# Supplementary material for: Single-cell analysis of skeletal muscle macrophages reveals age-associated functional subpopulations
Source: eLife. 2022 Oct 19;11:e77974. doi: 10.7554/eLife.77974 (PMC9629833; doi:10.7554/eLife.77974)
Supplement: Supplementary file 1. [file elife-77974-supp1.xlsx]

## Sheet: Cl0
Table S1. Featured genes for each subclusters
Gene	FC	pct.1	pct.2	p_val_adj	cluster
Pf4	4.42381	99.4	61.5	0	0
Folr2	4.09435	89.3	37	0	0
Ccl8	3.82475	42.7	20.8	4.19337e-130	0
Selenop	3.79597	99.6	84.5	0	0
Lyve1	3.74887	81.7	30.2	0	0
Hspa1a	3.48996	95.6	76.8	0	0
Fxyd2	3.45716	87.2	40.6	0	0
Gas6	3.29264	92.4	40	0	0
Maf	3.20191	95.5	56	0	0
Jun	3.16162	88.9	67.4	0	0
C1qc	3.16035	99.7	64.6	0	0
Hspa1b	3.16025	95.3	76.8	0	0
Cd209f	3.12658	50.4	23	2.19967e-215	0
Cbr2	3.12555	88.5	37.8	0	0
Cfh	3.11737	87.5	52.2	0	0
C1qa	3.08041	99.7	64.6	0	0
Ltc4s	3.06145	79.9	34.5	0	0
Cd163	3.0242	75.2	41.3	0	0
F13a1	2.99331	96.3	72	0	0
Dab2	2.9481	97.6	65.8	0	0
C4b	2.87124	66.8	29.7	0	0
Mrc1	2.78368	99.1	73	0	0
Igfbp4	2.75114	90.6	41.2	0	0
Stab1	2.70862	85.3	43.1	0	0
Ccl24	2.7028	83.9	45.1	0	0
Hspb1	2.67975	28.5	18.1	1.75991e-37	0
Fcgrt	2.6721	88.5	55.4	0	0
Fcna	2.65904	63.3	27	0	0
Wwp1	2.62926	86.2	44.3	0	0
Rnase4	2.60157	87.3	45.4	0	0
Timp2	2.55192	96.9	74.4	0	0
C1qb	2.54337	99.5	69.3	0	0
Ednrb	2.54265	67.8	38.5	1.24482e-256	0
Serinc3	2.508	99.8	96.4	0	0
Cd209d	2.4257	53.9	34.1	3.7284e-141	0
Clec10a	2.40894	72.7	51.8	1.30588e-217	0
Ccl7	2.3299	69.7	47.7	3.04491e-133	0
Serpinb6a	2.31928	83.6	49.7	0	0
Txnip	2.30838	82.5	62.1	3.35118e-288	0
Egr1	2.28909	71.5	44.2	3.48868e-223	0
Hsph1	2.25224	69	59.5	1.21331e-91	0
Itm2b	2.24046	99.8	99.4	0	0
Igf1	2.23898	78.5	37.7	0	0
Apoe	2.22813	95.7	84.2	0	0
Cd209g	2.21849	45.2	19.5	5.12512e-196	0
Mafb	2.21788	97	79.2	0	0
Glul	2.21746	90.9	64.7	0	0
Tns1	2.20617	77.2	40.4	0	0
Snx2	2.20362	86.2	64	0	0
Trf	2.19483	94.2	74.3	0	0
Rhob	2.17606	83.3	63	9.80293e-259	0
Hsp90aa1	2.16565	97.4	98.1	6.29381e-186	0
Mtss1	2.16468	87.1	56.2	0	0
Klf2	2.11685	81	68.4	8.89883e-147	0
Csf1r	2.09137	98.5	92.8	0	0
Zfp36l1	2.09085	94.2	68.6	0	0
Ehd4	2.0736	90.9	72.3	0	0
Tgfbr2	2.04037	83.4	54.9	0	0
Ctsc	2.03388	99	93.4	0	0
Ccl12	2.03188	34.4	20.1	3.29677e-61	0
Pmp22	2.03028	91.4	60.6	0	0
C3ar1	2.01143	93.6	63.3	0	0
Rgl1	2.00911	86.3	64.5	1.57915e-219	0
P2rx7	2.00732	63.2	34.7	2.11896e-253	0
Blvrb	2.00421	87.8	70.5	0	0
Gdf15	1.9887	56.8	45.8	4.95794e-48	0
Gpr34	1.98559	64.2	28.1	0	0
Frmd4b	1.9772	77.1	41.3	0	0
Cd63	1.94287	95.3	63.1	0	0
Mef2c	1.94019	89.6	67.8	0	0
Emp1	1.92811	84.6	64.6	1.92144e-211	0
Cd36	1.92424	95.2	77.5	0	0
Mmp9	1.91138	42.2	24.4	3.76517e-101	0
Tcf4	1.91045	87.5	66.8	0	0
Ccl2	1.90452	82.5	67.7	2.58573e-104	0
Sulf2	1.89977	73.2	48.1	2.58469e-292	0
Atf3	1.87929	91.2	87.3	5.03033e-161	0
Slco2b1	1.87837	67.2	28.1	0	0
Stard8	1.8757	67	35.6	0	0
Nrp1	1.87405	78.6	52.6	0	0
Hspd1	1.87322	76.4	71.4	1.5988e-79	0
Jund	1.85743	99.4	97.2	0	0
Itsn1	1.8385	68.7	36.3	0	0
Cebpd	1.83443	73.7	55.3	9.03399e-174	0
Grn	1.82994	98.1	90.9	0	0
Cd33	1.8281	76.3	43.7	0	0
Rgs10	1.82222	89.5	75.8	0	0
Gpr183	1.82215	57	33.2	6.73222e-166	0
Cd81	1.8206	96.4	70.4	0	0
Psd3	1.82035	73.4	42.3	0	0
Hpgd	1.81923	77.1	51.5	4.38949e-247	0
Lrp6	1.81913	67.4	37.6	2.19936e-297	0
Ifi207	1.79658	91.8	83.5	2.87745e-215	0
Ighm	1.79615	82.3	54.1	0	0
Klf4	1.78517	84.5	71.9	7.78183e-151	0
Zfp36	1.76681	95.7	95.7	1.63429e-155	0
Tgfbi	1.76384	98.3	90.9	0	0
Man1a	1.75551	84.5	68.4	2.53899e-263	0
C5ar1	1.75401	91.6	70.6	1.16065e-268	0
Rin2	1.75163	60.6	35.8	3.49791e-209	0
Rab11fip5	1.75023	66.6	35.1	0	0
Tsc22d3	1.74991	77.3	61.2	1.05182e-185	0
Pepd	1.74943	83.8	69.9	1.36819e-255	0
Hpgds	1.7491	63.2	35.5	4.84546e-216	0
Pla2g2d	1.73802	36.8	17.3	9.32631e-121	0
Mfsd11	1.73714	68.8	45.1	2.6367e-249	0
Mylip	1.73379	66.3	48.8	1.1868e-142	0
Lifr	1.71783	72.1	49	1.74713e-221	0
Cmah	1.71583	53.9	22.7	4.17761e-275	0
Eps15	1.7135	72.4	52.2	3.50719e-238	0
Selenbp1	1.71038	55.4	24.3	4.22733e-294	0
Timd4	1.70064	44.1	19.2	7.21472e-185	0
Kitl	1.69842	62.1	36.2	4.06623e-210	0
Zfand5	1.69322	94.4	92.7	9.39104e-222	0
Snx5	1.69318	91.4	79.2	1.48503e-302	0
P2ry6	1.68448	67.4	42.9	6.98969e-226	0
Ap1b1	1.67509	68.6	45.4	4.49728e-240	0
Ms4a7	1.67483	78.6	45.1	7.6782e-271	0
Tfrc	1.6748	58.9	33.3	8.74957e-200	0
Rcn3	1.67371	44.2	18.6	1.7341e-202	0
Pltp	1.6628	96.8	81.2	9.44968e-224	0
Dnajb1	1.66275	68.1	63.9	1.63393e-58	0
Junb	1.6608	97.3	96.8	5.80858e-158	0
Abca9	1.65804	68.4	46	3.58585e-218	0
Serpinb8	1.65746	71.7	50.7	7.53688e-198	0
Cd209b	1.65738	27.1	13.7	7.74761e-68	0
Ang	1.65587	55.1	26.2	4.27798e-247	0
Dse	1.65432	74.2	52	4.88661e-232	0
Siglech	1.65334	42.1	17.8	1.46816e-180	0
Ier5	1.6521	93.9	92.6	1.63424e-162	0
Rab3il1	1.64564	70.8	47.4	6.72107e-231	0
Fcgr2b	1.64412	90.8	78.7	1.01705e-260	0
Mat2a	1.63595	87.6	84.5	2.33606e-133	0
Gas7	1.63355	83.4	66.8	1.16245e-243	0
Bag3	1.63005	63.3	60.5	6.63443e-36	0
Cltc	1.61926	96.8	93.4	0	0
Ccdc152	1.61873	38.8	15.9	6.27537e-170	0
Ier3	1.61725	92.4	86.9	5.8021e-105	0
Dhrs3	1.61452	83.9	61.9	1.63951e-243	0
Camk1	1.61296	68	47.7	1.2263e-207	0
Bmp2	1.6093	38.9	17.5	3.08853e-132	0
Mgl2	1.60483	83.8	59.7	1.86119e-168	0
Tcn2	1.60328	68.8	50	3.70837e-196	0
Pnp	1.59982	82.7	75.7	9.20852e-162	0
Etv1	1.59655	49	21.5	5.71095e-220	0
Alox5	1.59188	57.9	33.3	5.87383e-203	0
Pfkfb3	1.59184	51.9	40	1.98389e-69	0
Colec12	1.5902	33.7	13.9	1.34148e-135	0
Slc9a9	1.5892	58.4	34.8	3.00731e-197	0
Idh2	1.58532	61.8	38.2	5.1869e-209	0
Aplp2	1.57434	89.5	81	2.76904e-221	0
Zfhx3	1.57222	79.2	61	3.43608e-188	0
AC160336.1	1.5695	77.1	80.8	3.96507e-13	0
Pea15a	1.56935	77.2	60.2	7.76299e-201	0
Bin1	1.56817	67.6	50.8	4.46053e-178	0
Ifi203	1.56679	73.3	56.5	1.2617e-135	0
Fchsd2	1.56384	50.3	29.5	3.65631e-141	0
Cited2	1.56287	65.9	54.2	6.74546e-79	0
Adgre1	1.55885	100	100	0	0
P2ry12	1.54913	48.2	20.7	2.38235e-225	0
Myo5a	1.547	72.9	58.2	6.87776e-165	0
Hspe1	1.54495	87	87.9	9.74665e-36	0
Ap2a2	1.5387	80.6	70.9	7.9116e-163	0
Tceal9	1.53844	66.4	52.6	6.69577e-122	0
Reps2	1.53321	48.9	21.1	3.87998e-214	0
Fgfr1	1.53168	65.5	48.9	5.13263e-114	0
Sbf2	1.53144	60.4	37.9	2.97667e-185	0
Ptpn18	1.53099	93.7	90.3	1.60486e-224	0
Spred1	1.52862	73.1	56.8	3.54426e-161	0
Ctsb	1.52712	99.9	99.2	0	0
Gatm	1.52692	65	43.1	8.75998e-152	0
Rnf150	1.52388	58.7	39.5	1.26189e-150	0
Tanc2	1.52208	52.4	26.4	6.36304e-196	0
Pros1	1.51964	65.3	51.9	5.49404e-120	0
Smagp	1.51749	52.4	27.4	8.10124e-193	0
Sash1	1.51653	60.3	38.8	3.80377e-151	0
Sema4a	1.51431	66.2	51.9	1.4475e-135	0
Nr3c1	1.5138	72.5	58.2	6.44836e-158	0
Tmem106a	1.51336	69.8	55.7	1.68315e-143	0
Rasgrp3	1.5107	44	19.3	1.49006e-183	0
Cd38	1.50792	38.6	19.2	5.49685e-121	0
B4galt6	1.50647	63.7	47.2	4.93138e-134	0
Cd164	1.50385	71.9	57.7	6.2984e-149	0
Qk	1.50254	90.8	86.1	7.10579e-196	0
Sgpp1	1.50215	57.8	41.5	8.33655e-119	0
Slfn2	0.666606	80	94.3	1.45419e-144	0
Rpl15	0.665776	96.2	98.2	7.43858e-252	0
Cd300c2	0.665354	49.8	72.6	2.15612e-98	0
Stx11	0.664962	17.7	55.7	1.35338e-233	0
Adgre4	0.663857	9.7	31.4	4.29157e-114	0
Rps15a	0.663742	98.9	99.1	0	0
Rpl41	0.663056	99.6	99.8	0	0
Ifit1	0.661792	19	28.6	1.31315e-21	0
Dusp16	0.661295	34.7	49.8	1.12067e-34	0
Ell2	0.660825	20.4	58.8	2.04172e-239	0
Rps16	0.660802	99.2	99.6	0	0
Gda	0.657764	63.4	81.1	3.8358e-128	0
Klra2	0.656754	3.3	36.4	5.84096e-249	0
Dennd4a	0.656111	50	79.7	1.51224e-171	0
Rpl19	0.65543	99.2	99.3	0	0
Cyp4f18	0.65466	36.4	69.3	3.99855e-171	0
Rps27l	0.654224	80.6	90.1	3.20669e-148	0
Pou2f2	0.653244	49.4	59.6	3.38576e-22	0
H3f3a	0.652668	99.4	99.8	0	0
Rpl32	0.652598	98.2	98.9	7.30141e-291	0
Vps37b	0.651385	52.7	82	4.3655e-178	0
Nfkb1	0.648647	79.1	91.9	1.39285e-152	0
Gk	0.647963	8.4	40.1	2.20336e-210	0
Tspan13	0.646834	16.3	52	5.07483e-224	0
Ifitm1	0.645777	9.5	28	3.86877e-85	0
H2afj	0.645541	64.4	88.3	5.60012e-224	0
Bcl2l11	0.645046	47.6	76.2	2.13911e-165	0
H2-Ab1	0.644088	85.5	88.4	7.58165e-89	0
Gclm	0.642982	28.8	56.1	9.96131e-133	0
Slc2a1	0.641643	11.6	53.3	1.44664e-303	0
Cdk2ap2	0.641606	50.4	76.4	1.15157e-136	0
Arpc1b	0.638748	92.8	98.7	0	0
Crem	0.638256	27.8	58.4	6.56915e-174	0
Gpr141	0.638169	2.6	30.9	1.29042e-205	0
Clec4b1	0.637974	36.8	60.6	4.62403e-130	0
Slc15a3	0.635647	46.1	79.3	1.05297e-210	0
Rps19	0.635141	98.9	99.2	0	0
Flna	0.635036	60.1	87.2	1.1671e-229	0
Rpl18	0.634723	97.8	99	0	0
Mefv	0.634558	4.2	42.9	7.14074e-304	0
Ccr2	0.634404	37.4	78.1	3.05438e-224	0
Isg15	0.633661	35	51.1	1.9752e-43	0
Fam107b	0.633622	21.7	56.8	1.08933e-209	0
Sema4d	0.631847	7.4	44	1.65735e-261	0
Cd300a	0.63178	53.3	81.4	5.45025e-186	0
Spag9	0.630511	76.3	95	1.62615e-248	0
Fgr	0.627756	5.3	47.1	0	0
Rpl13	0.627233	99.4	99.5	0	0
Pde4b	0.625875	33	70	1.00883e-237	0
Sod2	0.625043	53.1	80.4	2.30736e-163	0
Map4k4	0.623043	50.5	79.9	3.22097e-207	0
Tyrobp	0.622554	98.6	99.4	2.45398e-211	0
Tkt	0.620912	59.2	87.9	2.94442e-263	0
Sub1	0.620577	86.9	96.6	7.30279e-263	0
Raf1	0.620211	32.2	59.5	5.62775e-130	0
Xylt1	0.619415	10.3	52.9	0	0
Sorl1	0.618239	4.5	36.8	5.77355e-234	0
Gcnt2	0.617467	2.3	31.9	1.16552e-220	0
Slc38a1	0.616901	42.1	79.9	9.35609e-241	0
Hopx	0.616531	22.7	60.4	1.06767e-248	0
Ms4a4c	0.615857	8.2	34.6	1.74443e-159	0
Srxn1	0.615138	26.9	61.2	6.80099e-193	0
Ramp1	0.614522	12	60.5	0	0
Cd24a	0.613617	2.2	36.7	1.67602e-271	0
Ldha	0.61355	65.6	87.4	5.04066e-238	0
Ptpn1	0.613292	66.1	88.5	2.36771e-168	0
Rps7	0.61124	98	98.9	0	0
Pgd	0.6106	48	79.8	2.04317e-243	0
Psap	0.610416	99.8	99.6	5.19562e-242	0
Lmnb1	0.610026	8.5	43.5	9.8758e-242	0
Gpcpd1	0.608729	36.3	66.9	2.55154e-178	0
Myo1g	0.606801	27.4	66.5	6.88761e-272	0
Aldoa	0.60571	70.3	90.2	2.07329e-250	0
Sowahc	0.605446	24.3	68	2.65986e-297	0
Fyn	0.604127	12.6	55	0	0
Nfil3	0.60341	27.1	67.1	2.93619e-270	0
Got1	0.600974	48.4	75.6	1.75288e-197	0
Eno1	0.600214	52.3	83.7	1.30491e-260	0
H2-DMb1	0.598884	63.7	80.2	4.09437e-155	0
Itgb7	0.597555	6.6	48.6	0	0
Pfkp	0.596294	34.1	72.9	1.33106e-287	0
Runx3	0.595207	10.6	53.2	0	0
Ccrl2	0.59339	42.5	65.3	2.52226e-89	0
Smox	0.592616	20.8	58.5	1.5602e-256	0
Emilin2	0.590204	58.6	84.4	8.31764e-222	0
Tmsb4x	0.590168	100	100	0	0
Nr4a2	0.588801	17.8	55.5	8.92507e-245	0
Sirpb1c	0.588033	5.6	42	7.98877e-272	0
Tgm2	0.586881	5.3	36.2	1.04623e-216	0
Cyba	0.585377	96.2	98.9	0	0
Txn1	0.58189	79.6	93	3.17298e-217	0
Ahr	0.58185	37.8	71.8	4.11313e-243	0
Cks2	0.580809	30.2	63.1	5.28023e-186	0
Rps27a	0.578431	99.7	99.9	0	0
Il6	0.576271	8.1	26.3	4.86453e-90	0
Ccr5	0.57559	43.9	70	1.63607e-161	0
Emb	0.574816	38.9	80.8	2.44307e-299	0
Ppp2r5a	0.571812	51.1	78.8	6.97628e-171	0
Bcl2a1a	0.571432	6	38.7	6.20913e-233	0
Alcam	0.570866	30.2	74.8	0	0
Ptprc	0.569775	89.4	98.3	0	0
Gpr35	0.56614	4.7	50.6	0	0
Wnt11	0.562353	1.9	30.6	4.2416e-216	0
Basp1	0.559438	43.5	69.2	1.33323e-140	0
Flrt3	0.557831	5.3	32.5	2.06334e-179	0
Ltb4r1	0.554121	2.5	50.5	0	0
Gapdh	0.54416	88.8	97.3	0	0
Rel	0.542179	71.5	90.5	2.99913e-255	0
Rpsa	0.540465	99.2	99.4	0	0
Coro1a	0.540114	81.8	96.6	0	0
Rnh1	0.539874	59.3	84.4	2.36201e-242	0
Prdx6	0.538708	34.5	69	8.77073e-231	0
Gfpt1	0.537212	20.9	59.1	4.40662e-268	0
Arl5c	0.53317	15.9	56.5	1.15488e-284	0
Itgb2	0.532717	59.9	89.4	0	0
Il7r	0.531171	3.9	41.1	9.0597e-291	0
Smpdl3a	0.528796	49.9	77	1.0515e-181	0
Atox1	0.527481	83.4	96.7	0	0
Fxyd5	0.5244	84.1	98.2	0	0
Pgk1	0.52402	39.3	79.9	0	0
Prdx1	0.523305	94.7	97.4	3.51339e-129	0
Agpat4	0.523013	15.7	67.5	0	0
Lrrfip1	0.517753	37	79.4	0	0
Tnfrsf1b	0.51599	56.8	87.5	0	0
Ifitm6	0.514848	34.6	67.5	3.29878e-238	0
Ptgs2	0.513057	7.6	34.3	1.30097e-160	0
Mpeg1	0.510359	58.2	92.9	0	0
Hp	0.509787	1.6	27.4	7.66802e-190	0
Bhlhe40	0.509308	11.8	59.7	0	0
Ezr	0.509307	28.3	75.4	0	0
F10	0.508743	1.9	38.6	8.70053e-300	0
Esd	0.501407	54.8	82.1	7.63512e-260	0
Anxa2	0.498142	77.3	92.5	0	0
Cd14	0.49752	90.3	92.9	2.8201e-190	0
Actg1	0.490662	99.2	99.9	0	0
Traf1	0.48382	15.3	62.7	0	0
Mmp19	0.482795	20	45.3	1.78399e-130	0
Txnrd1	0.479887	54.1	88.6	0	0
Rplp0	0.478625	97.5	99.3	0	0
Prdx5	0.474859	68.4	87.5	7.52745e-211	0
Lpl	0.464787	49.6	63.1	3.03889e-74	0
Pkm	0.461972	72.6	94.7	0	0
Rab11fip1	0.459915	10.9	65	0	0
Taldo1	0.459519	63.6	91	0	0
Gpr132	0.455364	27.6	81.8	0	0
Clec4d	0.453904	20.4	59.5	9.4627e-276	0
Nr4a3	0.453436	27.8	63.4	3.85904e-245	0
Malt1	0.448344	20.6	67.2	0	0
Plbd1	0.444041	29.8	84.4	0	0
Rilpl2	0.443653	45.5	87.8	0	0
Rnf149	0.440505	56.2	88.2	0	0
Pgam1	0.438897	48.7	84.4	0	0
Lsp1	0.427086	61.5	94.5	0	0
Stap1	0.415053	31.2	73.5	0	0
Samsn1	0.41094	23.8	74.7	0	0
Csf2rb	0.408389	31.2	72.9	0	0
Cd9	0.405394	30.2	71	3.48531e-298	0	transmembrane
Cd44	0.398642	70.8	97.6	0	0	Lyve1 homologue
Adam8	0.39611	9.7	67.8	0	0
Bcl2a1b	0.393396	40.3	78.7	0	0
S100a11	0.390481	63.7	91.5	0	0
Dusp5	0.388909	16.9	69.4	0	0
Il1rn	0.385169	19.5	57.6	2.36163e-261	0
Gm2a	0.383073	64.7	93	0	0
Fabp4	0.379596	9.5	32.5	9.75534e-129	0
Srgn	0.367891	90.8	99.4	0	0
Itgal	0.365361	5.1	44.5	0	0
Gsr	0.36404	18.4	57.1	1.25894e-297	0
Msrb1	0.35297	34.2	69.4	9.83e-275	0
Napsa	0.34547	8.3	71.9	0	0
Plaur	0.336729	38.6	89.7	0	0
Tnip3	0.329493	20.3	72.9	0	0
Bcl2a1d	0.324984	17.7	73.3	0	0
Slc16a3	0.31556	11.7	69.2	0	0
Ear2	0.31219	3.9	55.5	0	0
Btg1	0.300539	85.2	98.6	0	0
Gngt2	0.289151	9.9	50.3	0	0
Lgals3	0.271612	80.4	98.2	0	0
Fabp5	0.241806	14	46.8	5.11328e-205	0
Clec4e	0.237772	11.7	66.6	0	0
Cd52	0.221776	58.3	98.1	0	0
Lyz1	0.20516	33.8	52.4	1.53859e-104	0
Tmsb10	0.200503	66.6	96.2	0	0
Cytip	0.197572	13.9	82.2	0	0
Slc7a11	0.195498	8.6	69.3	0	0
Plac8	0.189238	6.9	39.4	5.39746e-239	0
Il1b	0.145383	18.7	75.4	0	0
Fn1	0.123109	12.7	70.1	0	0
Thbs1	0.121454	9.3	45.1	1.45563e-274	0
FC>1.5; pct1 or pct2>0.25; padj<0.05
FC: Cl0 vs. rest of 10 clusters combined
pct.1: Percent of positive cells in Cl0
pct.2: Percent of positive cells in rest of 10 clusters combined

## Sheet: Cl1
Gene	FC	pct.1	pct.2	p_val_adj	cluster
Cd209a	1.89524	84.5	34.2	1.07766e-287	1
Nr4a3	1.77355	85.7	45.3	4.21611e-208	1
Gm42418	1.75551	100	99.9	1.48504e-100	1
Sdc4	1.66956	96.1	62.3	3.19866e-172	1
Etv3	1.66952	98.5	75.9	9.91486e-205	1
Jund	1.54595	100	97.5	1.49036e-152	1
Rsad2	1.5375	55.1	22.3	8.74961e-138	1
Junb	1.53193	99.9	96.4	6.49911e-143	1
Wnt11	1.50873	53.1	15.1	3.38505e-229	1
Marcksl1	1.50491	99.3	76.2	3.17747e-153	1
Il6	1.50153	46.1	15.4	1.97251e-152	1
Taldo1	0.66406	91	80.6	1.11946e-19	1
S100a11	0.66216	89.7	81.2	3.17616e-11	1
Gapdh	0.659802	94.5	94.6	1.44841e-84	1
Cd300c2	0.631485	71.4	64.1	1.70062e-19	1
Tmsb10	0.617811	95.5	85	0.000272269	1
Lst1	0.615776	80.5	68.8	6.19268e-12	1
Lyz2	0.614296	100	99.7	2.24723e-119	1
Tyrobp	0.612865	98.4	99.3	2.38199e-138	1
Thbs1	0.595894	45.2	31.4	3.48888e-07	1
Prdx5	0.595892	83.1	81.1	3.51594e-38	1
AY036118	0.571219	77.6	74.3	4.33145e-27	1
Msrb1	0.519503	66	56.6	0.000100702	1
Gngt2	0.415666	33.9	38.1	4.14677e-15	1
FC>1.5; pct1 or pct2>0.25; padj<0.05
FC: Cl1 vs. rest of 10 clusters combined
pct.1: Percent of positive cells in Cl1
pct.2: Percent of positive cells in rest of 10 clusters combined

## Sheet: Cl1 vs Cl2-10
Gene	FC	pct.1	pct.2	p_val_adj
Lyve1	3.86293	89.5	11	0
Selenop	3.81707	99.8	79.5	0
Ccl8	3.78988	59.8	8.2	0
Pf4	3.75162	99.6	49.1	0
Folr2	3.74908	92.3	19	0
Maf	3.54429	98.1	42.4	0
Gas6	3.39052	95.7	21.9	0
Jun	3.37108	97.1	57.7	0
Hspa1b	3.26072	99.7	69.4	0
Mrc1	3.07324	99.9	64.3	0
F13a1	3.03958	99.4	63.1	0
Igfbp4	3.03584	94.3	24	0
Cd209f	2.9841	69.7	7.7	0
Hspa1a	2.89105	99.7	69.4	0
Cfh	2.74817	94.4	38.5	0
Cd163	2.73691	89.6	25.6	0
Dab2	2.72961	99.4	54.9	0
Clec10a	2.72659	93.3	38.3	0
Cbr2	2.70165	93.4	19.8	0
Fcna	2.62422	75	11.3	0
C4b	2.61817	80.7	13.1	0
Ccl7	2.57216	86.5	35.1	1.20224e-299
Egr1	2.51163	88.6	29.8	0
Ednrb	2.50604	84.8	23.4	0
Ccl24	2.49687	93.1	29.5	0
Hsph1	2.49385	90.5	49.5	2.29975e-291
Fxyd2	2.48433	89.3	24.7	0
Jund	2.44165	100	96.3	0
Mtss1	2.43104	96.7	43	0
Cd209d	2.42317	80.2	19.1	0
Gm42418	2.38449	100	99.9	3.84866e-189
Wwp1	2.35137	91.6	29	0
Fcgrt	2.33831	94.8	42.6	0
Timp2	2.33644	99.1	66.4	0
Mafb	2.32269	99.2	72.7	8.80894e-303
Rnase4	2.27817	92.4	30.1	0
Ltc4s	2.23158	84.4	18.3	0
Glul	2.21148	96.3	54.5	0
Junb	2.20761	99.9	95.8	1.52613e-296
Stab1	2.12378	89.8	28	0
Zfp36l1	2.11946	97.6	59.2	0
Hsp90aa1	2.09603	100	97.4	7.98772e-298
Pmp22	2.0873	97.1	48.7	0
Klf2	2.0818	95.8	59.6	6.64029e-244
Rhob	2.05561	93.8	53	1.11753e-275
Serinc3	2.045	99.9	95.3	0
Tns1	2.0275	86.2	25.5	0
Txnip	1.99195	93.1	52	9.32013e-284
Serpinb6a	1.98992	91.7	36.1	0
Rgl1	1.97979	96.2	54.2	3.24189e-266
Zfp36	1.9683	99.8	94.4	1.22636e-245
Hspd1	1.95781	94.2	64	2.15578e-219
C1qc	1.94848	99.5	53.3	2.87887e-250
Cd209g	1.92292	60.8	6	0
Klf6	1.91925	100	97	8.4024e-296
C1qa	1.90122	99.7	53.3	1.72511e-236
Klf4	1.88333	96.2	64	7.87973e-222
Igf1	1.87217	86.7	21.7	0
Tcf4	1.86787	95.1	57.5	1.19692e-301
Ighm	1.86648	90.3	42.4	1.27039e-282
Cd209a	1.8566	84.5	28.6	1.06045e-298
Hspb1	1.8228	41.9	10.3	1.28686e-174
Mgl2	1.7928	96	47.8	7.57463e-267
Ehd4	1.79156	96.6	64.4	1.86262e-296
Marcksl1	1.78742	99.3	69	9.39469e-246
Snx2	1.78428	92.8	54.6	1.18365e-284
Ppp1r15a	1.78054	98.9	80.9	1.61794e-237
Sdc4	1.77531	96.1	52.8	1.0467e-215
Aplp2	1.77144	98.8	75.2	1.35353e-290
Ccl2	1.77094	95.6	58.7	6.75919e-212
Grn	1.7651	99.6	88.1	4.70964e-270
Tfrc	1.75762	75.5	19.6	0
Mylip	1.74696	84.5	37.2	2.74809e-260
Mat2a	1.74047	98	80.1	8.82431e-214
Fgfr1	1.73577	88.6	36.1	0
Irf2bp2	1.73528	99.1	78.3	2.11665e-206
Cd36	1.72643	98.7	70.7	3.03125e-205
Trf	1.72497	95.8	67.3	2.28817e-234
Ctsc	1.71998	99.7	91.3	5.81285e-262
Mef2c	1.69909	95.1	58.9	1.91472e-250
C3ar1	1.69138	96.5	52.5	2.15034e-220
Etv3	1.69043	98.5	78.1	1.84213e-186
Mt2	1.68846	78.9	30.4	2.09606e-228
P2rx7	1.68678	75.4	21.5	0
Lgmn	1.68516	99.9	90.9	1.98669e-168
Sulf2	1.67519	85.1	36.1	4.27901e-287
Ier5	1.67412	99.6	90.4	8.29698e-210
Tgfbi	1.67315	99.4	88.2	1.63769e-243
Lifr	1.66513	86.9	36.7	3.58415e-285
Bag3	1.66127	87.4	51.8	9.7397e-179
Frmd4b	1.65881	83.5	27.6	0
Zfhx3	1.65828	93.1	50.6	1.31538e-254
Stard8	1.65515	78.1	21.8	0
mt-Nd3	1.64101	99.9	95.6	1.51657e-193
Gatm	1.63821	82.8	30.3	1.10973e-278
Eps8	1.63441	98.2	73.7	1.01364e-188
Nrp2	1.63328	93.3	50.3	6.47638e-232
Itsn1	1.62813	78.8	22.5	0
Tgfbr2	1.60493	88.8	43.8	2.65139e-259
Cltc	1.60218	99.9	91.3	1.27783e-245
Kctd12	1.59984	99.4	83.6	1.80506e-199
Nfkbiz	1.59967	98.5	76.4	4.76876e-172
Man1a	1.59654	93.4	60.3	9.61865e-211
Psd3	1.59097	84	28.7	0
Emp1	1.59077	93	55.3	4.26357e-160
Pea15a	1.58852	91	50.2	7.06348e-242
Nrp1	1.58781	87.1	41.4	5.87165e-252
Kitl	1.58497	76.1	23.2	0
Atf3	1.58373	99	83.5	1.01565e-162
Lrp6	1.58292	77.4	24.7	0
Cd209b	1.5789	42.4	4.4	0
Abca9	1.57889	84.1	33.6	6.67339e-289
Ifi207	1.57724	98.3	78.7	5.76272e-165
Slc5a3	1.57556	77.7	32.8	2.77068e-215
Tsc22d3	1.57466	89.5	52	2.97355e-182
Dnajb1	1.5745	88.3	56	8.08047e-154
Abca1	1.57415	94.1	48.4	4.2285e-212
Fcgr2b	1.566	97.7	72.5	5.65669e-215
Serpinb8	1.56203	85	39.5	1.00462e-222
Cited2	1.55994	83.9	44.5	2.37462e-164
Fosb	1.55863	89.3	49.3	1.06276e-182
B4galt6	1.55839	85.1	34.9	2.79083e-267
mt-Nd1	1.55796	100	98.9	1.97562e-237
Dse	1.55751	85.5	41.1	8.53178e-221
Eps15	1.556	85.7	41.3	2.66047e-246
Pros1	1.55469	86.9	40.5	5.96137e-245
Pla2g2d	1.55221	51.9	6.1	0
Pepd	1.54844	94.7	61.9	1.42018e-207
Cd33	1.54781	83.6	30.7	4.63833e-275
Dusp1	1.54483	99.9	93.1	2.7521e-150
Bmp2	1.54285	50.5	6.8	0
Cd164	1.53997	88.4	47.8	2.59586e-210
Pdxk	1.53952	86.4	52.4	5.482e-143
Mmp9	1.53847	60.8	12.6	0
Cd83	1.53736	99.7	84.2	1.315e-151
Marcks	1.52932	100	95.1	6.23409e-167
Timd4	1.52824	56.9	6.9	0
Hbegf	1.52811	56	14.7	2.74226e-231
Rsad2	1.5272	55.1	21.4	1.51212e-126
Prcp	1.52566	99.1	81.3	1.23243e-185
Rin2	1.52462	73.4	23.6	2.19391e-266
Ap1b1	1.52194	81.4	33.7	6.55344e-252
Sgpp1	1.52038	77.9	29.7	1.88974e-248
Rbpj	1.51729	99.3	81	3.34654e-163
Csrnp1	1.51717	94.4	63.1	1.22014e-136
Wsb1	1.51514	97.9	80	2.74251e-143
Pltp	1.51327	98.8	75.4	1.19851e-148
Eid1	1.5079	91.6	54.1	1.80474e-201
Sdc3	1.50535	95.3	64.6	1.26233e-156
Cmah	1.50534	63.3	9.6	0
Sema4a	1.50414	85.1	41.1	2.09442e-218
Zbtb20	1.5021	89.5	50.6	6.73114e-184
BC005537	1.50179	99.8	94	2.18148e-142
Uba52	0.665737	78.1	85.9	4.14339e-102
Ftl1	0.665203	100	100	2.65989e-148
Sorl1	0.665096	30.1	39	1.56376e-23
Fau	0.66503	99.9	99.9	1.23651e-202
Ms4a4c	0.664087	33.1	35.1	1.03839e-05
Clic1	0.663217	94.8	95.4	1.31788e-124
Aprt	0.662001	77.9	71.1	9.8903e-29
Ifitm2	0.657596	98.5	98.6	2.35274e-53
Pgam1	0.656371	88.1	83.2	4.13827e-50
H3f3a	0.65307	99.8	99.8	1.14654e-230
Adgre5	0.65297	88.7	86.1	1.29988e-60
Rnh1	0.651849	87.3	83.4	1.04895e-46
Ubb	0.650581	98.9	99.4	5.51881e-139
Rpl11	0.648706	98.4	99.1	3.25542e-221
Rps18	0.647988	98.4	98.8	1.23953e-195
Coro1a	0.647804	97.6	96.2	4.89625e-90
Raf1	0.64283	62.9	58.4	4.70425e-14
Rps7	0.641595	98.5	99.1	2.08288e-203
Pkm	0.639746	95.6	94.5	9.27345e-121
Rpl18	0.632254	98.7	99.1	1.3655e-220
Cd14	0.631152	99	90.9	3.02088e-14
Rpl29	0.627882	95.8	97.6	4.28191e-194
Bcl2a1d	0.624573	75.6	72.5	6.03789e-18
Rpl32	0.624497	98.9	98.9	2.25683e-224
S100a4	0.622141	98.7	93.9	2.89324e-99
Prdx1	0.621468	99.7	96.6	1.31132e-06
Atox1	0.62078	94.9	97.2	4.09767e-173
Rpl15	0.619826	97.2	98.5	5.63129e-223
Rps19	0.616296	99.2	99.2	1.22213e-252
Rps3	0.612152	97.6	99	2.85037e-226
Rpl21	0.609466	98.9	99.1	3.5215e-247
Sirpb1c	0.608974	30	45.9	1.71081e-55
Itgb2	0.602557	88.4	89.7	1.43757e-113
AY036118	0.599395	77.6	74.6	3.07492e-16
Tgm2	0.597015	26.2	39.4	9.55428e-39
Plaur	0.592244	90.5	89.4	1.35458e-100
Ifitm3	0.591996	98.7	96.5	3.93249e-45
Stap1	0.586368	77.4	72.2	1.58623e-28
Prdx6	0.582786	68	69.3	7.90756e-50
Txn1	0.581182	91.4	93.5	3.65168e-120
Rplp0	0.579738	99.4	99.3	6.82376e-275
Eno1	0.579065	79	85.2	3.58041e-161
Slc7a11	0.575349	73.3	68	1.47358e-10
Esd	0.56215	81.6	82.3	6.36624e-81
Srgn	0.558566	99.5	99.3	1.00761e-172
Fxyd5	0.556486	97.3	98.6	5.9322e-253
Smpdl3a	0.555339	80	76.1	2.84185e-47
Cyba	0.553179	98.5	99.1	1.86551e-285
Lyz2	0.54926	100	99.5	8.74012e-158
Bcl2a1b	0.541473	81.9	77.7	1.09632e-27
Cd300c2	0.532187	71.4	73	5.7734e-72
Lst1	0.530991	80.5	69.6	4.3026e-19
Ace	0.529771	12.6	25.3	2.18781e-30
Gapdh	0.528858	94.5	98.2	7.92749e-276
Clec4e	0.526683	64.8	67.1	7.29032e-28
Hp	0.519309	15.7	31.2	1.32789e-41
Cd52	0.516414	96	98.8	3.13774e-243
Napsa	0.514351	66.3	73.7	8.30967e-90
Taldo1	0.512793	91	91.1	2.04681e-147
Clec4d	0.508089	56.9	60.4	5.29384e-38
Tyrobp	0.506699	98.4	99.7	6.10061e-289
S100a11	0.495508	89.7	92.1	2.87895e-142
Slc16a3	0.493974	66.2	70.2	1.33662e-56
Cd9	0.472606	74.5	69.9	1.80948e-35
Prdx5	0.46188	83.1	88.9	1.19492e-135
Gsr	0.456037	54.6	58	1.40577e-35
Itgal	0.451558	41.8	45.3	3.9062e-18
Lgals3	0.446225	99.2	97.9	3.74118e-168
Slpi	0.427632	16.2	25.7	1.51941e-14
Tmsb10	0.422123	95.5	96.4	3.42844e-217
Fabp4	0.408815	29.8	33.4	7.07297e-07
Thbs1	0.391473	45.2	45.1	0.000269183
Msrb1	0.380238	66	70.5	7.47511e-79
Plac8	0.322833	33.5	41.3	2.94384e-24
Gngt2	0.294666	33.9	55.6	2.17829e-103
Fabp5	0.291151	46.3	47	1.40919e-07
FC>1.5; pct1 or pct2>0.25; padj<0.05
FC: Cl1 vs. Cl2-10 combined (no Cl0)
pct.1: Percent of positive cells in Cl1
pct.2: Percent of positive cells in Cl2-10 combined

## Sheet: Cl2
Gene	FC	pct.1	pct.2	p_val_adj	cluster
Lyz1	8.45458	84.6	40.2	0	2
Fn1	5.16396	95.3	44.7	0	2
Retnla	4.00163	95.5	62	0	2
Lpl	3.24147	91.3	53.5	0	2
Isg15	3.15723	65.7	42.7	7.57718e-98	2
Mmp19	2.96836	62.9	33	6.10058e-150	2
Ifit1	2.90547	43.5	22.6	3.94401e-77	2
Il1rn	2.89473	76.1	40.4	1.06783e-197	2
Ear2	2.8269	83.6	31.8	0	2
Fcrls	2.77262	95.3	58.4	0	2
Ccl5	2.76868	33	13.6	2.17185e-78	2
Areg	2.72072	42.9	16.3	7.39544e-124	2
Il6	2.58061	43.7	16.7	3.99054e-126	2
Crip1	2.3574	100	97.5	0	2
H2-DMa	2.25291	99.2	79.9	0	2
Clec4b1	2.24851	90.7	46.9	0	2
Ccl6	2.24414	99.4	90.5	0	2
Cxcl10	2.21956	59.9	39.7	1.65956e-58	2
S100a10	2.21072	99.1	88.9	4.07291e-272	2
Qpct	2.19602	86.4	39.1	0	2
H2-DMb1	2.11761	98.5	71.1	0	2
Tnip3	2.11553	89.7	50.6	3.34365e-224	2
Rsad2	2.10634	35.6	26.5	4.4896e-14	2
Cd2	2.07711	72	17.2	0	2
H2-Ab1	2.06786	99.8	85.4	0	2
Oasl1	2.04931	52.7	32.2	4.21367e-66	2
Ecm1	2.04907	93.5	66.4	7.94903e-205	2
Rab11fip1	2.04062	85.1	41.7	5.85465e-279	2
Anxa2	2.0376	98.9	85.8	9.31454e-264	2
Ifih1	2.03742	53.8	37.1	5.83551e-54	2
Ccl9	2.01432	99.8	88.3	1.33932e-285	2
H2-Eb1	1.9765	99.9	82.3	7.08246e-267	2
Cd52	1.97226	99.1	83.2	1.03151e-242	2
Ccrl2	1.96507	72.6	55.6	4.47072e-59	2
Cd74	1.96502	99.9	94.1	4.62246e-288	2
Malt1	1.94317	76.8	48.4	1.24325e-139	2
Capg	1.94199	96.5	76.2	9.76291e-267	2
Cxcl2	1.92568	82.5	72.1	3.80686e-54	2
Hopx	1.92333	83.6	42.6	9.39299e-269	2
Cfp	1.8835	97.4	73.4	3.90023e-251	2
Dcstamp	1.87844	51.9	10.7	0	2
Furin	1.86364	92.4	73.1	4.18022e-166	2
Ltb4r1	1.85251	72.5	29.1	1.73828e-270	2
H2-Aa	1.82032	99.9	84.5	3.96076e-229	2
Slfn2	1.82021	95	88.9	5.72188e-154	2
S100a6	1.81267	99.9	95.2	6.96688e-274	2
Tspan3	1.80757	75.8	50	1.2636e-128	2
Il7r	1.7702	56.1	24.9	1.91211e-133	2
Adam8	1.76904	82	44	6.73193e-184	2
Flrt3	1.74459	45.5	20.3	8.56276e-97	2
Hilpda	1.73376	59.7	41.6	4.82137e-57	2
Gm2a	1.73149	95.7	82.1	1.16259e-178	2
Mt1	1.73067	96.9	83.8	3.00781e-85	2
2022-09-11	1.73016	89.5	60.3	8.06933e-205	2
Naaa	1.71063	93.2	65.1	7.10968e-177	2
Rilpl2	1.7039	87.1	72.2	1.51747e-111	2
Mcub	1.69957	90.5	65.6	2.26729e-205	2
Lsp1	1.69717	97.3	81.8	1.03292e-190	2
Sdc1	1.69037	48.3	11.4	2.62942e-262	2
Aldh1a2	1.67608	57.6	13.1	0	2
Bcl2a1a	1.67217	53.9	24.1	5.39164e-125	2
Slamf8	1.66617	74.3	38.5	1.23438e-176	2
Nr4a3	1.66508	68.6	49.3	2.01207e-58	2
Bcl2a1d	1.66316	84.7	50.8	3.70162e-147	2
Irf4	1.65188	56.6	37.4	3.70553e-52	2
Ezr	1.6402	83.2	56.6	5.09834e-121	2
Ccr2	1.63677	94.7	60.3	5.62934e-131	2
Clec4e	1.63672	62.3	46.9	6.54936e-32	2
S100a4	1.63253	99.8	91	1.50686e-178	2
Plxnd1	1.63238	86.8	52.5	5.67333e-195	2
Rras2	1.62311	56.1	15.1	9.15189e-285	2
Kcnn4	1.61428	57.2	23.9	1.32741e-152	2
Csf2ra	1.60735	93.1	73.9	3.27222e-176	2
Upb1	1.60095	49.5	10.9	1.0967e-294	2
Csf2rb	1.59426	75.7	57	1.76076e-62	2
Rps27l	1.5891	96.2	85.6	8.71567e-126	2
Phlda1	1.58005	74.1	50.1	7.37368e-66	2
Tuba1a	1.57517	71.5	44.4	3.77569e-110	2
H2-DMb2	1.56936	53.7	14.3	9.6833e-270	2
Psma4	1.56176	89.7	69.3	1.13572e-152	2
Bhlhe40	1.5608	69.8	40.3	5.39916e-99	2
Anxa1	1.5572	86.2	69.6	1.53183e-74	2
Dbi	1.55539	97.1	89	1.97942e-163	2
Bcl2a1b	1.55483	86.6	63.2	1.4035e-94	2
Cd226	1.5539	57.2	13.2	0	2
Lgals3	1.54684	99.5	91.4	3.16705e-178	2
Cd200r1	1.54636	59.3	24.2	5.56479e-182	2
F10	1.54396	42.5	24.3	2.98821e-46	2
Ahcyl2	1.54267	80	50.6	3.51157e-144	2
Cotl1	1.52807	98.3	91.3	5.15231e-165	2
S100a11	1.52063	95.6	80.5	3.22608e-139	2
Unc119	1.51282	63.8	34.6	4.05317e-119	2
Nfkb1	1.50919	93.3	86.9	5.38807e-81	2
Ramp1	1.50909	74.8	40.2	1.37916e-153	2
Ahr	1.50463	78.8	58.1	5.48971e-79	2
Ryr1	1.50118	58.1	19.9	9.54364e-219	2
Kmt2e	0.666634	63.3	77	5.51337e-84	2
Pla2g2d	0.665988	5.3	26.5	1.78863e-61	2
Cdkn1b	0.665109	24.3	45.8	4.22043e-55	2
Grina	0.664259	42.4	61.2	6.01003e-66	2
Nisch	0.658483	48.5	69.5	4.24649e-96	2
Ang	0.653991	6.2	40.2	1.7886e-124	2
Timd4	0.653474	4.7	30.8	5.44102e-85	2
Ifngr1	0.652449	61.4	77.1	2.39875e-89	2
Cmah	0.652237	5.9	37	2.33556e-110	2
B2m	0.651343	99.7	99.9	3.94491e-188	2
Klf4	0.650578	67.1	77.3	1.49316e-47	2
Ptger4	0.650097	17.4	43.3	9.01209e-77	2
P2ry6	0.649709	26.5	54.7	3.02345e-89	2
Sash1	0.649405	19	50	2.47969e-101	2
Rgs2	0.649076	39.7	61.5	6.33023e-64	2
Ptpn18	0.64733	86.5	92.2	3.56916e-122	2
Adrb2	0.645393	21.5	44.1	9.21707e-62	2
Dusp6	0.643295	10.1	37.6	4.3763e-87	2
Eps15	0.643199	41.6	61.4	1.89953e-80	2
Lrp6	0.643158	26.3	50.5	9.8479e-81	2
Mfsd11	0.64193	34.2	55.7	3.87578e-80	2
Nr3c1	0.640801	44.7	65.7	2.89014e-93	2
Ppp1cc	0.640295	37.7	60.1	1.28688e-85	2
C1qb	0.639489	75.5	79.5	7.65106e-44	2
Klf2	0.639216	69.6	72.9	2.87351e-20	2
Tsc22d3	0.638166	52.3	68.6	1.96204e-62	2
Sat1	0.637802	97.4	97.5	3.93959e-67	2
Tfrc	0.637077	18.2	45.3	8.12123e-87	2
Dusp16	0.636061	34.2	46.8	9.64564e-26	2
Cd9	0.635364	49.9	59.4	2.00464e-17	2
Irf8	0.63378	26.5	59.4	4.55847e-116	2
Fcgr1	0.631155	11.9	48.1	1.26048e-132	2
Pfkfb3	0.629772	23.4	47.1	3.57176e-68	2
Itsn1	0.627189	23	50.5	1.31433e-95	2
Rin2	0.625772	17.9	47.9	7.32482e-100	2
Wsb1	0.625757	76.2	86	2.69318e-95	2
Gatm	0.625038	29	53.6	2.3385e-79	2
Tcn2	0.624872	29.9	60.3	3.49845e-119	2
Jund	0.624341	98.2	97.8	1.85253e-47	2
Tgfbi	0.623131	95	93	2.34814e-107	2
Mat2a	0.62289	81.7	86.1	4.58446e-70	2
Bmp2	0.622652	3.9	27.7	8.84441e-75	2
Tpd52	0.62238	81.5	88.1	2.00993e-84	2
Fyb	0.621983	62.9	75.9	2.49936e-78	2
Hmgb2	0.621624	57.9	73.2	5.5251e-80	2
Ier5	0.621306	90.4	93.5	7.85289e-80	2
Stard8	0.619104	21.2	49.6	4.3002e-98	2
Tceal9	0.617211	36.6	60.3	9.83402e-91	2
Zfand5	0.615333	90.9	93.6	4.00031e-98	2
Msr1	0.61421	14.2	51.3	1.96466e-139	2
Hexb	0.612747	55.9	68.8	2.08712e-58	2
Ssh2	0.611198	41	64.2	4.90537e-96	2
Mef2a	0.606504	72	85.1	4.27338e-133	2
Junb	0.606503	95.8	97.2	2.24529e-71	2
Cxcl16	0.604185	52.1	70.1	2.46706e-61	2
Aif1	0.603791	51.8	76.5	1.77112e-111	2
Lgals1	0.601107	81	88.1	2.79856e-59	2
Ddx3x	0.598513	85.1	91.2	1.21071e-136	2
Cst3	0.596344	99.8	99.7	1.74115e-218	2
Nrp1	0.595553	40.2	64.3	1.32257e-104	2
Emp1	0.593601	61.1	72.6	2.27019e-55	2
Gpr34	0.593442	9.4	44.5	1.57614e-126	2
Man1a	0.592535	60.1	75.7	1.68584e-104	2
Rgs10	0.589114	73.5	81.3	3.48214e-106	2
Slco2b1	0.589069	7.7	45.9	1.11464e-147	2
Blvrb	0.587699	63.1	78.1	1.00127e-104	2
Ccl7	0.586505	42.6	56.7	3.46782e-28	2
Zfp36	0.579912	93	96.1	4.60916e-76	2
Dse	0.57687	30.8	63.7	1.13909e-142	2
P2rx7	0.576265	20	47.7	1.38566e-90	2
Ifi207	0.575536	69.8	88.8	1.37891e-112	2
Grn	0.575039	96.2	92.7	1.10425e-93	2
Hsp90aa1	0.574126	98.7	97.7	2.56714e-44	2
Serpinb6a	0.574103	47.3	62.7	1.19643e-61	2
Ctsc	0.573527	96	95	4.73187e-125	2
Ms4a6d	0.570419	30.3	66.6	8.85662e-151	2
Fabp5	0.56869	51.5	33.9	1.28974e-23	2
Snx2	0.557637	60.4	72.8	3.60878e-95	2
Cd300c2	0.55558	44.5	68.7	4.57646e-92	2
Cebpd	0.555264	41	64.5	2.43643e-94	2
Mmp9	0.551016	10.7	33.2	2.4391e-62	2
Lair1	0.548309	17.9	57.9	4.25717e-170	2
Sulf2	0.547393	27.2	60.8	8.64513e-144	2
Mgst1	0.543246	12.5	47.4	2.78994e-128	2
Frmd4b	0.542075	20.4	58	3.62711e-152	2
Fos	0.541582	60.7	82.4	7.59416e-124	2
Ehd4	0.538492	67.5	80	1.22758e-130	2
Rhob	0.536587	61.1	70.8	1.10424e-55	2
Tns1	0.529544	29.5	55.9	1.16952e-106	2
Trem2	0.529255	27.5	59.5	5.02706e-108	2
Mtss1	0.528545	54.2	68	1.66123e-86	2
Hsph1	0.527302	56.8	63.5	5.29011e-26	2
Gpr183	0.525316	9.4	46	2.92261e-135	2
Ednrb	0.524456	29.8	50.7	9.57966e-54	2
C3ar1	0.524272	55.3	75.9	4.6871e-116	2
Cd209g	0.521572	3.9	31.6	1.14759e-93	2
Cd33	0.519338	18.7	59.9	5.24634e-181	2
Cd36	0.518038	76.3	84.3	4.12909e-108	2
Gsr	0.515818	35.6	46.3	1.86783e-25	2
Ctsb	0.514486	99.3	99.4	2.31175e-185	2
Mylip	0.513896	26	59	5.6123e-136	2
Hpgds	0.507825	9.8	50	4.33143e-162	2
Ccl12	0.505433	6.8	27.6	8.16403e-58	2
C5ar1	0.502735	48.5	82	7.46141e-164	2
Tgfbr2	0.502659	36.5	68.4	6.54992e-172	2
Timp2	0.502014	84.6	81.1	8.56696e-87	2
Egr1	0.4985	36.9	55.5	1.1621e-57	2
Mrc1	0.494839	92.3	79.5	7.87469e-62	2
Itgal	0.492392	16.7	34.4	1.49319e-41	2
Tcf4	0.48828	52.3	76.8	1.87931e-171	2
F13a1	0.488008	87.4	78.5	3.55281e-49	2
Mef2c	0.482134	52.5	78.4	2.25301e-183	2
Cd209d	0.476895	26	42.8	7.5009e-46	2
Csf1r	0.473415	90.2	95.3	4.0554e-246	2
Ier3	0.472487	78.3	90.4	5.90665e-139	2
Cd93	0.469203	17.3	62.4	3.12336e-202	2
Msrb1	0.468809	49.6	59.6	2.92981e-37	2
Thbs1	0.468253	27.8	34.7	9.34395e-06	2
Ms4a6b	0.467543	19.3	68.2	4.19759e-243	2
Glul	0.466212	54.5	76.1	3.48938e-148	2
Ms4a6c	0.454605	42.2	82.9	7.99346e-245	2
Igf1	0.453496	14.9	56.5	5.12274e-173	2
Txnip	0.443561	49.7	71.7	4.44554e-112	2
Ctsl	0.443472	55.8	79.5	1.04891e-167	2
Itm2b	0.44287	99.6	99.5	2.07902e-302	2
Pou2f2	0.438873	25.2	61.4	1.50489e-142	2
Dab2	0.438594	75.5	76	1.48104e-95	2
Stk17b	0.428219	50.4	81.5	2.52439e-221	2
Lst1	0.426328	42	75.5	8.77787e-176	2
Mafb	0.426093	72.5	86.9	2.28193e-142	2
Trf	0.423687	58.4	84.2	2.99009e-219	2
Clec10a	0.420807	49	60	7.50856e-63	2
Fcna	0.407835	11.3	43	1.56945e-114	2
C1qa	0.407294	61.6	78.1	6.19595e-131	2
Ltc4s	0.404127	17.2	54.2	2.38446e-151	2
Hpgd	0.39924	19.4	66.3	2.15113e-230	2
Wwp1	0.399135	23.6	63.3	2.72712e-196	2
Fxyd2	0.398956	28.4	59.9	6.35432e-124	2
Cd163	0.391095	35.8	54.8	1.01521e-82	2
Gngt2	0.387647	15	41.1	5.04992e-78	2
Fcgrt	0.38275	36.4	70.8	1.90446e-198	2
C4b	0.382398	11.9	46.4	5.56099e-127	2
Lgmn	0.378752	84.8	96.8	0	2
Cd63	0.371907	47.7	77.5	5.86882e-200	2
Hspa1b	0.371306	77	83.6	7.34478e-78	2
C1qc	0.364685	60.7	78.3	3.61571e-156	2
Ms4a7	0.362279	14.9	62.5	9.98598e-217	2
Hspa1a	0.355003	78.2	83.6	1.02862e-81	2
Zfp36l1	0.345126	45.8	81.8	4.85884e-244	2
Cd209f	0.341448	6	35.9	1.75372e-102	2
Igfbp4	0.339051	18.9	63.2	1.53858e-211	2
Rnase4	0.338065	14.3	66	4.05577e-264	2
Serinc3	0.329749	93.5	98.1	0	2
Cbr2	0.317405	13.4	60.6	6.01561e-224	2
Stab1	0.315298	13.5	63.6	7.43805e-253	2
Jun	0.304081	53.7	77.6	7.01793e-137	2
Plac8	0.29598	11	32	5.55872e-56	2
Cfh	0.272395	23	70.1	1.90024e-257	2
Gdf15	0.272227	25.3	53.3	6.01444e-93	2
Maf	0.269201	42.2	72.9	2.18209e-204	2
Gas6	0.266418	15.4	63.5	9.83045e-246	2
Folr2	0.235122	15.8	59.8	2.31715e-205	2
Lyve1	0.23469	7.2	53.1	1.82482e-203	2
Ly6e	0.232706	30.5	83.3	0	2
Ccl8	0.229523	5.3	31.5	3.3116e-84	2
Pf4	0.189447	51.2	77.2	2.53641e-211	2
Selenop	0.166316	77	91.3	6.73504e-290	2
Apoe	0.155786	58.9	92.6	0	2
FC>1.5; pct1 or pct2>0.25; padj<0.05	FC>1.5; pct1 or pct2>0.25; padj<0.05
FC: Cl2 vs. rest of 10 clusters combined
pct.1: Percent of positive cells in Cl2
pct.2: Percent of positive cells in rest of 10 clusters combined

## Sheet: Cl3
Gene	FC	pct.1	pct.2	p_val_adj	cluster
Thbs1	8.59618	81.9	26	0	3
Plac8	7.73176	85.4	20.1	0	3
Chil3	4.67159	57.3	9.1	0	3
Ly6c2	3.68565	63.4	7.3	0	3
Tmsb10	3.25912	99.5	84.7	0	3
Hp	2.9766	67.3	11.5	0	3
Ms4a4c	2.97074	77.2	18.1	0	3
Gsr	2.9605	87.7	37.9	0	3
Slpi	2.95705	48.9	11.4	8.84967e-258	3
Slc16a3	2.89167	87.3	45.1	0	3
Prdx5	2.78144	95.3	79.2	0	3
Vcan	2.61744	42.7	4.6	0	3
Cytip	2.57838	94.6	55	0	3
Clec4e	2.52231	89.5	42.6	6.17611e-281	3
Gm9733	2.50783	68.3	9.1	0	3
Msrb1	2.50297	90.2	53	0	3
Ifitm3	2.48759	99.2	96.7	0	3
Gngt2	2.44386	82.4	30.3	0	3
Prdx6	2.41448	83.7	53.9	2.20643e-250	3
Taldo1	2.41107	97.1	79.9	0	3
Prdx1	2.36949	99.2	96.1	9.71335e-153	3
Sirpb1c	2.31635	80.6	22.4	0	3
Slc7a11	2.24376	82.5	44.7	1.21553e-192	3
Napsa	2.1807	87.7	45.8	1.59278e-294	3
Emilin2	2.17729	96.5	73	0	3
Ms4a6c	2.1648	95.5	74.2	2.9995e-280	3
Ifitm6	2.14689	83.1	52.9	7.91225e-218	3
Esd	2.13879	92.3	70.4	1.30442e-206	3
Mgst1	2.09969	73.9	37.4	4.98569e-211	3
Emb	2.08774	93.1	63.4	1.99367e-265	3
Gpr35	2.07307	74.6	29.8	0	3
Gclm	2.04321	69	43.9	8.59225e-136	3
Ptpn1	2.0392	94.6	79.3	2.83682e-219	3
C3	2.03053	64.8	15.6	0	3
Plaur	2.02007	96.7	69.7	2.29239e-246	3
Gpr141	2.01889	64.4	15.1	0	3
Tpd52	1.98662	97.4	85.5	3.41003e-275	3
Pkm	1.98319	98.5	85.9	2.95689e-286	3
Lst1	1.98263	93.4	67.2	3.25016e-245	3
Lpar6	1.9671	71.7	33	2.75487e-227	3
Klra2	1.96411	68.9	18.9	0	3
Raf1	1.952	79.4	46.3	9.68169e-213	3
Lyz2	1.94402	100	99.7	2.81527e-280	3
Mefv	1.9361	72.2	23.9	0	3
F10	1.93445	61.6	21.4	1.33715e-224	3
Rplp0	1.88075	99.8	98.6	0	3
Plbd1	1.87633	94.7	62.5	2.81393e-251	3
Cd52	1.86117	99.5	83.2	2.46128e-234	3
Il1b	1.85803	84.6	53	1.02942e-116	3
Coro1a	1.85793	98.2	90.9	7.56967e-249	3
Clec4n	1.85032	60.5	25.8	2.28605e-175	3
Clec4d	1.85031	82.4	41.4	2.21543e-238	3
Smox	1.84955	76.8	41.6	1.21085e-203	3
Smpdl3a	1.84327	89.3	65.1	1.40952e-198	3
Tyrobp	1.83813	99.8	99	0	3
Lgals3	1.82735	99.9	91.4	3.92317e-262	3
Stap1	1.82236	85.4	55.9	2.96131e-174	3
Ifitm2	1.81307	99.8	98.1	3.86082e-259	3
Btg1	1.80482	99.8	93.5	2.2796e-209	3
Cd300a	1.79139	93.5	69.1	1.55383e-215	3
Itgal	1.78861	70.5	25.8	4.27593e-244	3
Hmox1	1.78728	96.7	94.5	7.28546e-72	3
Card19	1.78536	95.6	81.8	1.06913e-200	3
Cd14	1.77281	95.9	91.4	3.84379e-108	3
Pgam1	1.75794	90.8	70.2	1.79082e-163	3
Cebpb	1.75652	100	97.3	8.71697e-247	3
Srgn	1.72662	99.9	96.1	2.67876e-235	3
Cdk2ap2	1.71661	85.2	65.4	1.21838e-129	3
Mpeg1	1.71553	98.5	79.1	3.61452e-219	3
Rpl18	1.71024	99.9	98.4	0	3
Sell	1.70104	40.3	7.6	7.34851e-255	3
Pgd	1.69493	89.4	66.5	3.81444e-180	3
Runx3	1.69324	66.3	35.3	7.96782e-139	3
S100a4	1.69079	99.3	91.1	1.29955e-175	3
Sub1	1.68852	98.8	92.6	3.73159e-203	3
Cd44	1.68627	99.3	87.4	1.92844e-184	3
H3f3a	1.68397	99.9	99.6	0	3
Samsn1	1.66958	84	54.4	4.79797e-148	3
Pgk1	1.66495	85.8	64	2.11505e-137	3
Sema4d	1.65813	66.3	26.9	3.42918e-209	3
Ccr2	1.65689	88.9	61.4	4.64228e-124	3
Itgb7	1.65611	67.9	30	2.43604e-192	3
Samhd1	1.6541	91	79.4	1.94714e-127	3
Cycs	1.65374	92.4	72.2	7.70816e-166	3
Xylt1	1.6518	68.1	34.7	7.4363e-166	3
Lyn	1.64906	94.7	82.9	6.71396e-185	3
Ppp2r5a	1.64721	86.7	67.3	4.7153e-153	3
Aprt	1.6435	86.3	61.2	1.37389e-154	3
H2afj	1.63912	94.8	78.4	1.87074e-180	3
Ptgs2	1.63691	46.3	22.5	6.0195e-75	3
Smchd1	1.62531	73.3	55.7	2.14118e-82	3
Atox1	1.62331	98.9	91.4	1.1279e-178	3
Mcemp1	1.61636	56.8	15	8.67303e-280	3
Eno1	1.61522	91.9	70.8	1.47997e-159	3
Rnh1	1.61471	90.4	74.1	4.40741e-100	3
Rps27a	1.59359	100	99.8	0	3
Fyb	1.58862	89	71.7	3.61807e-119	3
Fxyd5	1.58805	99.5	92.8	2.06035e-190	3
Rps9	1.5653	100	99.9	0	3
Ms4a6b	1.56393	81.1	58.2	3.51917e-101	3
Ncf2	1.56384	94.8	85.2	1.4231e-156	3
Mrpl33	1.56243	94.7	82.8	2.37996e-156	3
Prdm1	1.55731	66.9	37.8	2.18583e-113	3
Nfil3	1.55153	78.9	50.4	1.3365e-123	3
Rps7	1.55114	99.8	98.4	6.38905e-235	3
Cd177	1.54257	37	4.4	0	3
Uck2	1.54236	42.3	10.6	1.03984e-215	3
Rps3	1.53307	99.6	98	1.62235e-209	3
Sec61b	1.53143	96.3	88.5	2.5906e-156	3
Sorl1	1.53117	63.7	20.6	6.49678e-244	3
Rnf149	1.526	95.6	75.2	4.38734e-133	3
Rap1a	1.52297	97	91.9	2.67683e-133	3
Sat1	1.52151	98.4	97.4	1.1633e-87	3
Aldoa	1.52042	93.7	82.2	7.76727e-119	3
Arhgef10l	1.52009	71	42.2	4.03933e-135	3
Rpl24	1.51901	99.9	98.7	1.7717e-248	3
Fau	1.51866	100	99.9	2.92062e-279	3
Arl1	1.51737	73.1	55	4.90634e-76	3
Por	1.5168	88.2	69.9	3.27382e-87	3
Gda	1.51638	90.1	73.1	2.45864e-89	3
Rpl18a	1.51518	99.8	99	1.08112e-235	3
Slc2a1	1.51224	65.3	35.9	5.67202e-126	3
Lrrfip1	1.50855	85	62.8	1.45202e-122	3
Gcsh	1.50677	48.9	28.3	2.97413e-69	3
Eif3f	1.50623	97.2	89.3	1.60333e-155	3
Rpl19	1.50532	99.9	99.2	2.59474e-248	3
Itgb2	1.50247	93.8	77.8	6.10522e-134	3
Gpd2	1.50125	59.1	31	3.29203e-117	3
Tnfsf9	0.666152	36.7	52.3	3.95594e-28	3
Gadd45b	0.665675	66.7	82	1.87453e-61	3
Phlda1	0.665224	41.2	55.5	1.11663e-28	3
Gpr183	0.662832	24.1	43.5	1.04398e-41	3
Cd9	0.661094	54	58.7	9.59686e-07	3
Ckb	0.660642	54.9	73.8	2.30176e-64	3
Hbegf	0.660572	8.7	31.8	1.48538e-64	3
Plau	0.660251	13.1	39.4	1.07013e-72	3
Man1a	0.657237	60.7	75.6	9.80152e-65	3
Ptms	0.656657	63.9	81.3	1.06701e-91	3
Rgs10	0.656381	70.9	81.7	2.07878e-67	3
Lgals1	0.655744	85.4	87.4	2.71802e-36	3
B4galt6	0.655588	27.3	56.5	6.28277e-94	3
Sdc3	0.654097	52.1	75.9	8.52153e-95	3
Rab11fip5	0.653926	17.5	49.5	4.74639e-107	3
Csf1r	0.653476	95.3	94.5	2.71973e-72	3
Rab3il1	0.652902	26.2	59.4	3.66678e-108	3
Cd164	0.652872	40.5	65.7	8.41905e-93	3
Nr4a3	0.650896	49.7	52.4	1.86277e-05	3
Nfkbia	0.648254	78	91.4	2.31515e-77	3
Tfrc	0.647332	18.5	45.1	3.31041e-79	3
Snx5	0.646412	72.9	84.7	1.94549e-90	3
Dok2	0.644732	29.8	61.4	2.46228e-102	3
Abca9	0.644645	27.2	57.3	8.31326e-101	3
Csrnp1	0.642024	55.4	68	4.54846e-48	3
Bcl2a1b	0.640587	53.4	68.6	2.32014e-31	3
mt-Nd1	0.638075	99.8	99.3	5.87453e-186	3
Tubb5	0.637611	68.5	85.1	1.66816e-82	3
Ap1b1	0.637245	24.8	57.3	3.29999e-112	3
Ccrl2	0.634135	45.5	60	3.75331e-26	3
Itm2b	0.633511	99.7	99.5	5.07597e-74	3
Mafb	0.633271	83.1	85.1	5.03561e-33	3
Dnajb1	0.633186	55.5	66.8	4.58289e-33	3
Bmp2	0.632692	6.4	27.2	1.69105e-57	3
Hspe1	0.632315	84.8	88.1	6.27321e-40	3
Ier5	0.630831	91.2	93.3	9.06409e-66	3
Etv3	0.629863	74.8	80.5	1.51994e-48	3
Peli1	0.628809	69.9	79.2	7.19616e-57	3
C5ar1	0.628071	67.3	78.9	1.12875e-59	3
Nrp1	0.627641	41.3	64	1.37015e-81	3
Lifr	0.624709	31.5	60.3	1.20958e-93	3
Lrp6	0.623722	19.8	51.5	1.36263e-106	3
Irf4	0.622869	16.7	43.9	3.31611e-75	3
Rhoc	0.622514	12.2	46.1	1.35375e-113	3
Stard8	0.61751	18.6	49.9	4.1076e-105	3
Spred1	0.617312	37	66	1.05354e-106	3
Slc5a3	0.616809	25.2	49.1	1.35834e-66	3
Tsc22d3	0.616661	48.3	69.2	2.38881e-75	3
Ifih1	0.616616	28.4	41.3	9.2942e-22	3
Kctd12	0.616348	81.1	90.2	3.49246e-91	3
Itsn1	0.616011	18	51.2	1.92197e-114	3
Slamf9	0.612086	27.5	60.3	1.57526e-114	3
Tnfaip3	0.612052	46.3	68	5.89866e-65	3
Slco2b1	0.610487	11.3	45.2	9.10754e-119	3
Mylip	0.608627	36.8	57.2	1.01698e-61	3
Cited2	0.608104	40.8	60.7	2.02704e-56	3
Aplp2	0.606213	71.5	85.7	1.52223e-118	3
Isg15	0.60403	41.4	46.7	0.000667556	3
Gpr34	0.597836	11.1	44.1	6.74571e-113	3
Cd33	0.597788	27.5	58.3	5.76508e-104	3
Pepd	0.596267	55.9	77.3	6.50235e-113	3
Abca1	0.594489	40.8	69.8	3.83439e-109	3
Cxcl16	0.592433	46.9	70.9	2.63986e-80	3
Zbtb20	0.592261	38.4	66.8	1.18491e-106	3
Cd209a	0.590042	19.9	46.2	1.89343e-64	3
Zfhx3	0.587599	41.9	70.8	8.10392e-117	3
Rbpj	0.587076	73.5	89.6	1.22313e-139	3
Ighm	0.58314	47.4	65.6	4.0569e-68	3
Psd3	0.582228	19.1	57.5	1.67814e-142	3
Apoe	0.581775	94.7	86.7	3.90722e-13	3
Clic4	0.581328	73.2	84.5	4.29825e-89	3
P2rx7	0.580083	18.3	47.9	7.5938e-93	3
Snx2	0.579435	56.7	73.3	2.24006e-84	3
Bag3	0.578339	43.7	64.3	1.7383e-63	3
Ctsb	0.576936	99.8	99.4	3.43263e-127	3
Pea15a	0.575399	34.6	70.6	4.08446e-161	3
Rgs1	0.572151	23.7	45.3	5.84727e-48	3
Trf	0.570967	71.4	82.1	2.16682e-81	3
Ppp1r15a	0.569725	79.2	87.1	1.36136e-85	3
Marcksl1	0.565854	67.1	82.1	1.62797e-88	3
Tgfbr2	0.564901	39.6	67.8	1.85277e-118	3
Blnk	0.564865	21.5	64.1	1.54241e-177	3
Klf4	0.563912	62.8	78	1.69294e-64	3
Frmd4b	0.563866	21.5	57.7	3.77663e-132	3
Id2	0.563205	61.3	74.2	4.97784e-45	3
Kitl	0.561201	11.6	49.7	1.60574e-145	3
Nrp2	0.560912	34.6	68.8	2.12556e-135	3
Eps8	0.55979	67	84.9	8.20902e-117	3
Tcf4	0.557801	55.1	76.3	3.57547e-112	3
Gatm	0.554475	17.9	55.3	2.87735e-140	3
Oasl1	0.554467	18.6	37.7	2.29435e-41	3
Ehd4	0.552546	61	81	9.24409e-122	3
Cd209g	0.549302	5.9	31.1	1.16518e-76	3
Dhrs3	0.54751	34.4	74.4	1.05428e-182	3
Tuba1b	0.542463	58.1	82.9	4.12469e-165	3
Hpgds	0.5422	13.1	49.3	2.77611e-130	3
Mef2c	0.539416	55	77.9	1.18622e-124	3
Mmp9	0.534508	7.8	33.6	2.12167e-76	3
Cfp	0.534147	60	79.4	1.53886e-121	3
Ctsd	0.533326	88.3	92.3	3.44146e-64	3
Lmna	0.532606	49.2	81.7	2.14061e-134	3
Cxcl1	0.53001	10	26.4	1.09505e-32	3
Fgfr1	0.527279	18.1	60	8.35956e-173	3
Zfp36	0.527268	95.5	95.7	9.87564e-75	3
Atf3	0.525557	81.2	89.7	2.95586e-94	3
Fosb	0.523995	34.7	66.5	4.85765e-121	3
Glul	0.517721	55.5	75.9	1.38927e-111	3
Lpl	0.515478	41.3	61.6	3.97012e-50	3
Junb	0.508957	95.7	97.2	3.28672e-99	3
Grn	0.507728	90.8	93.6	1.36072e-153	3
Klf6	0.500351	97.2	97.9	1.19912e-167	3
Ednrb	0.497534	29.6	50.7	1.65324e-57	3
Nfkbiz	0.497515	62.3	85.2	2.32998e-149	3
Tns1	0.494543	17.4	57.7	9.49857e-162	3
Serinc3	0.491162	97.2	97.5	1.03901e-142	3
Ccl12	0.490773	6.8	27.5	3.78271e-55	3
Hspd1	0.48975	56.5	75.6	1.55499e-81	3
Emp1	0.485782	45.3	75	3.74275e-122	3
Gm42418	0.485731	100	99.9	7.84567e-90	3
Cxcl2	0.480385	60.4	75.7	2.66845e-47	3
Lyz1	0.477003	32.1	48.8	4.14933e-30	3
Ms4a7	0.46681	26.1	60.6	1.52438e-125	3
Rgl1	0.463415	41.4	76.2	8.5481e-145	3
Rsad2	0.460278	14.3	30	2.09685e-30	3
Igf1	0.459628	15.3	56.3	6.21293e-164	3
Clec10a	0.459447	37.2	61.8	1.5868e-83	3
C3ar1	0.458064	42.1	77.9	2.07463e-176	3
Rhob	0.456652	46.2	73.2	7.04567e-119	3
Mt2	0.45197	13.5	47.9	1.37361e-114	3
Cd36	0.449501	61.7	86.6	6.42859e-161	3
Hsp90aa1	0.448768	98.5	97.7	1.20842e-103	3
Cd83	0.442803	72	90.2	1.82964e-166	3
Txnip	0.438079	51.8	71.3	1.3287e-97	3
F13a1	0.436197	78.2	80	6.72897e-85	3
Fcna	0.433198	9.5	43.2	2.34453e-114	3
Ecm1	0.431928	40.8	74.9	2.2922e-163	3
Cfh	0.427585	47.1	66.1	3.69288e-91	3
Rnase4	0.426467	28.5	63.6	4.04486e-153	3
Mgl2	0.426069	31.3	73.1	7.77912e-179	3
Zfp36l1	0.425348	52.6	80.6	1.12742e-158	3
Wwp1	0.423158	25.8	62.8	1.06232e-165	3
Sdc4	0.42133	34.3	73.3	1.98132e-150	3
Fcgrt	0.419969	38.7	70.3	4.13246e-161	3
Hsph1	0.415841	46.5	65.1	1.96948e-64	3
Klf2	0.415316	51.8	75.7	8.19988e-110	3
Mtss1	0.413268	28.3	72.1	7.75553e-220	3
Ifit1	0.411952	9.9	28.1	1.46623e-42	3
Cd209d	0.410645	12.2	44.9	7.64595e-111	3
C4b	0.410189	14.4	45.9	4.03709e-107	3
Ltc4s	0.408975	14.6	54.5	5.7915e-156	3
Jund	0.40717	93.2	98.7	1.24419e-224	3
Gdf15	0.404699	30.3	52.4	2.16588e-53	3
Fcrls	0.401833	24.1	69.9	2.92916e-201	3
Stab1	0.399248	22.4	62	1.64441e-166	3
Serpinb6a	0.397927	21.2	66.8	3.79952e-217	3
Cd63	0.391719	41.3	78.5	7.11585e-194	3
Tnf	0.376287	33.1	67.4	4.11755e-131	3
Ccl3	0.374882	47.7	64.3	2.52754e-51	3
Pltp	0.374595	58.4	90.6	4.1474e-263	3
Egr1	0.372739	21.4	58	1.91357e-136	3
Cbr2	0.370795	18.6	59.6	8.43372e-173	3
Igfbp4	0.364028	21.9	62.5	2.39234e-179	3
Cd209f	0.357671	7.3	35.6	1.55637e-89	3
Fxyd2	0.344738	20.1	61.1	1.1436e-169	3
Ccl24	0.339283	22.9	63	5.85286e-171	3
Mt1	0.332501	60.3	89.7	2.26317e-195	3
Cd163	0.332213	17.9	57.6	1.16728e-165	3
Cd81	0.328359	36.4	85.4	0	3
Maf	0.328212	44.6	72.4	4.1043e-154	3
Timp2	0.324428	52.2	86.3	6.88014e-285	3
Cxcl10	0.315521	21.4	45.9	4.07737e-65	3
Pmp22	0.315415	27.7	77.2	5.60452e-271	3
Ccl2	0.306284	47.9	76.4	2.51209e-131	3
Ccl7	0.302372	25.3	59.4	5.12795e-118	3
Jun	0.30138	57.4	76.9	4.14205e-120	3
Mrc1	0.298503	45.7	87	3.49306e-272	3
Gas6	0.297748	18.2	62.9	1.0752e-211	3
Lyve1	0.296786	12.4	52.1	1.27582e-153	3
C1qb	0.284544	41.9	84.8	3.44025e-258	3
Dab2	0.282554	33.9	82.6	1.41066e-290	3
Ccl4	0.262188	45.2	65.9	2.24883e-73	3
Folr2	0.25386	16.9	59.5	4.34605e-187	3
Hspa1a	0.250312	62	86.1	1.00416e-174	3
Hspa1b	0.248003	63.8	85.7	3.40466e-162	3
Ccl8	0.240724	7.8	31	3.67087e-66	3
Selenop	0.239853	84	90.1	2.97906e-178	3
C1qc	0.238809	37.7	81.9	3.48279e-283	3
C1qa	0.228611	37.7	81.9	3.65209e-282	3
Retnla	0.228335	38.2	71.3	1.84118e-152	3
Pf4	0.178058	36.5	79.5	5.54022e-261	3
FC>1.5; pct1 or pct2>0.25; padj<0.05
FC: Cl3 vs. rest of 10 clusters combined
pct.1: Percent of positive cells in Cl3
pct.2: Percent of positive cells in rest of 10 clusters combined

## Sheet: Cl4
Gene	FC	pct.1	pct.2	p_val_adj	cluster
Gngt2	7.12204	99.6	34	0	4
Itgal	6.87873	98	28.3	0	4
Pglyrp1	6.33109	92.8	9.6	0	4
Ace	6.18755	94.6	11.2	0	4
Dusp16	5.50989	95.6	42.2	4.74237e-297	4
Fabp4	4.93735	81.3	22.1	5.77713e-267	4
Pou2f2	4.74435	92.8	54.3	4.19719e-222	4
Treml4	4.24088	85.5	10.3	0	4
Adgre4	4.06414	84.5	21.1	0	4
Smpdl3a	3.88725	98.4	66.7	2.43124e-247	4
Cd300e	3.82543	76.5	3.8	0	4
Tgm2	3.74115	85.9	23.1	0	4
Msrb1	3.73663	97	56	1.48916e-223	4
Stap1	3.70097	96.6	58	3.41854e-220	4
Nr4a1	3.68508	91.3	56.5	3.02021e-162	4
Dusp5	3.64216	92.6	50.5	2.39274e-201	4
Ppp2r5a	3.61865	95.4	68.6	9.38321e-217	4
Lst1	3.56479	98	69.3	1.69388e-222	4
Spn	3.5128	77.1	15.6	0	4
Fcgr4	3.45675	77.7	19.7	4.93585e-278	4
Napsa	3.45332	95	49.2	5.44314e-223	4
Gsr	3.41131	95.6	42	1.08245e-229	4
Cdkn1b	3.3586	85.5	40.4	3.89359e-196	4
Itga4	3.32254	92.2	62.7	1.21578e-193	4
G0s2	3.10316	48.7	5.2	6.56419e-286	4
Cd9	3.03091	93.4	56.1	1.30211e-150	4
Gfpt1	2.90402	79.7	45.2	5.7062e-133	4
Itgb2	2.88754	95.4	79.2	2.87745e-191	4
Cd300c2	2.83698	91.1	63.9	4.70695e-158	4
Grk3	2.82591	79.3	28	3.15665e-208	4
Stk10	2.82324	79.3	36.1	3.61e-175	4
Gcnt2	2.8221	74.8	19.6	5.20927e-236	4
Cd274	2.75884	71	27.4	3.32081e-150	4
Eno3	2.73948	60.8	8.9	0	4
Sat1	2.73721	100	97.4	2.65141e-174	4
Cytip	2.73414	97.8	58.3	7.20597e-170	4
Gk	2.7136	72.6	27.6	5.20362e-162	4
Cbfa2t3	2.68731	74.8	41.7	6.80625e-115	4
Plac8	2.68611	89.1	25.7	7.76872e-202	4
Cks2	2.66829	78.3	51.2	8.92811e-96	4
Tcf7l2	2.64353	72.8	24	8.26787e-192	4
Ear2	2.62993	85.1	36.5	5.55348e-146	4
Tmcc1	2.6287	91.1	73.2	4.20233e-125	4
Rbpms	2.59501	70.2	27.5	2.21395e-154	4
Pag1	2.58678	68.4	22.4	1.89424e-174	4
Cd300ld	2.58195	88.1	61.2	2.95977e-140	4
Ssh2	2.57635	88.9	59.4	2.17288e-151	4
Kpna4	2.57019	92.6	77.6	2.0932e-150	4
Fyb	2.56369	91.3	73.1	1.70701e-143	4
Agpat4	2.5635	83.3	49.3	7.57791e-144	4
Gpcpd1	2.56324	84.1	55.7	7.29412e-126	4
Filip1l	2.56166	70.8	31.9	2.08601e-131	4
Ly6e	2.54308	99.6	74.5	4.56818e-170	4
Raf1	2.53872	82.7	49.1	2.70433e-130	4
Rassf5	2.52271	75.3	34.1	3.61285e-151	4
Cyfip2	2.518	62.2	11	4.00897e-267	4
Msn	2.5165	97.2	90.7	3.78256e-184	4
Smpdl3b	2.50719	67.4	25.1	6.03579e-151	4
Slc16a3	2.48622	82.7	49.2	1.72166e-110	4
Ceacam1	2.48324	69	23.2	4.30017e-170	4
Stk24	2.47774	78.3	47.6	6.78058e-126	4
Ptprc	2.44543	99.8	95.2	1.1516e-198	4
Nupr1	2.44186	82.5	51.1	1.20672e-122	4
Dusp2	2.43872	67.6	28.5	2.18569e-114	4
Cyth3	2.43229	74.6	39.3	4.97765e-121	4
Samsn1	2.42654	86.3	56.9	2.3406e-116	4
Rgs2	2.42451	87.1	56.8	1.89774e-113	4
Stk17b	2.42211	95	76.1	5.90491e-145	4
Cyp4f18	2.41759	81.9	57.5	7.44713e-109	4
Cybb	2.411	99.8	96.7	3.48151e-193	4
Adgre5	2.40092	96	78	5.15679e-152	4
Prkcd	2.36939	93.6	81.7	2.43465e-143	4
Traf1	2.35646	75.7	46	2.1634e-87	4
Il17ra	2.35031	83.3	52.1	1.49694e-124	4
Gpr141	2.34415	62	19.7	9.78146e-140	4
Apbb1ip	2.33714	85.9	64.3	5.17628e-123	4
Smchd1	2.31624	79.7	57	3.68107e-95	4
Lrrfip1	2.31368	88.3	64.6	1.61354e-120	4
Myo1g	2.27919	80.9	52.6	8.22724e-117	4
Bcl6	2.27835	77.3	50	1.1682e-103	4
Myl12b	2.27547	92.4	81	4.3179e-138	4
Ifitm3	2.2543	100	96.9	4.80326e-164	4
Mbp	2.24251	70.4	41.2	1.21373e-94	4
Fmnl1	2.24082	82.7	57.6	6.10637e-117	4
Ccdc88c	2.23644	55.5	17.5	1.44662e-131	4
Pparg	2.22803	65.2	29	1.17072e-108	4
Rasgrp2	2.22489	68	27.9	2.26613e-132	4
Stk38	2.22441	71.4	44.1	4.53823e-93	4
Havcr2	2.224	62	18.4	4.38423e-157	4
Ikbkb	2.22137	85.1	66.2	2.14344e-111	4
Krt80	2.22129	64.2	36.9	1.08503e-77	4
Prr13	2.21356	90.1	78.7	4.55599e-113	4
Ly6i	2.20922	50.3	5.2	0	4
Srgn	2.19608	100	96.5	8.38343e-174	4
Fgr	2.19599	67.4	31.9	5.23607e-110	4
Rsrp1	2.19451	97.4	86.5	1.19649e-135	4
Zfyve9	2.19203	59.2	12.1	2.21613e-217	4
Rap1a	2.19203	95.6	92.5	1.11809e-144	4
Herc4	2.18975	69.6	39.2	8.12202e-98	4
Nedd9	2.18921	65.8	27.8	6.17561e-121	4
Cd244	2.1747	60	19.6	7.61744e-134	4
B2m	2.17304	100	99.9	3.07351e-238	4
Ppp1r2	2.17225	86.9	73.1	1.78884e-107	4
Il10ra	2.17218	79.9	57.4	2.28848e-93	4
Coro1a	2.13844	98.8	91.5	2.7747e-142	4
Tmed5	2.13829	85.5	70.3	1.03253e-100	4
Samhd1	2.13673	90.7	80.5	5.85475e-102	4
Ifngr1	2.13452	88.3	74.1	7.32625e-107	4
Cblb	2.13054	57.9	20.5	6.92857e-122	4
Nuak2	2.12815	70.8	37.8	3.65688e-100	4
Bcl2a1d	2.12015	87.5	53.8	4.02517e-92	4
Fam49a	2.11681	76.3	53.6	4.36072e-87	4
Sorl1	2.1124	69.6	24.1	1.46088e-148	4
Ankrd44	2.11059	80.3	61.3	4.21052e-88	4
Neat1	2.10021	98.8	96.1	6.14433e-95	4
Rps27	2.09938	100	99.6	6.11192e-231	4
Fcer1g	2.09603	100	99.6	2.33261e-216	4
Taldo1	2.08713	95	81.6	6.45411e-120	4
Rps19	2.08467	100	99	1.36141e-204	4
Lair1	2.08214	75.1	51	2.39534e-75	4
Trem3	2.08085	54.3	8.1	1.35187e-249	4
Cdk2ap2	2.07254	84.7	67.2	3.8966e-91	4
Sipa1l1	2.06622	61	30.7	5.20294e-82	4
Anp32a	2.0628	83.7	75.3	2.07499e-80	4
Klf3	2.06186	82.3	62.8	9.82619e-89	4
Pilra	2.06137	70.6	41.4	1.10881e-86	4
Map3k14	2.06006	65.4	31.7	7.2908e-95	4
S1pr5	2.05757	46.7	2.4	0	4
Fyn	2.04989	69.8	39.9	3.28294e-84	4
Slc12a2	2.04591	45.7	12.6	2.09168e-112	4
Flna	2.04428	90.9	77.9	1.83195e-106	4
Tmem38b	2.04422	60.8	23.4	1.8262e-111	4
Dock5	2.03919	51.3	8.9	2.8642e-213	4
Smc6	2.03273	64.2	44.4	1.2231e-55	4
Sema4d	2.02977	68	30.3	1.13643e-105	4
Cdc42ep3	2.02389	55.1	19.7	5.25481e-105	4
Sirpb1c	2.02342	68.2	28.3	3.72392e-109	4
Tyrobp	2.02163	99.8	99.1	1.8555e-178	4
H2-K1	2.00487	100	99.4	2.17309e-168	4
Birc6	2.00185	76.7	59.2	2.22156e-81	4
Cxcr4	1.99968	96.6	85.6	1.14207e-84	4
Prdx5	1.99793	88.5	81	1.16563e-73	4
Nxpe4	1.99495	51.7	10.3	4.5293e-185	4
Ifitm6	1.98468	83.7	55.6	6.33835e-83	4
H2-D1	1.97869	100	99.7	6.95784e-207	4
Heg1	1.97857	51.9	12.3	7.41426e-160	4
Ldlrad3	1.97668	51.3	11.9	3.50631e-158	4
Btg1	1.97622	100	94	1.97176e-113	4
Calm1	1.97379	99.6	99.1	8.8931e-151	4
Hes1	1.96775	43.5	24.4	1.15396e-26	4
Atp1a1	1.96454	95	88.6	4.14711e-118	4
Cd82	1.95763	62	30.6	2.30568e-86	4
Susd3	1.95382	59.2	34.4	1.33656e-60	4
Slc44a2	1.93098	54.5	17.1	7.24463e-122	4
Fau	1.92865	100	99.9	1.11991e-213	4
Osgin2	1.92547	62.6	41.2	5.08109e-50	4
Clec2i	1.92382	48.5	19.6	8.67657e-72	4
Zc3hav1	1.91421	83.5	69.4	6.8934e-77	4
Gpd2	1.9117	55.9	33.7	2.04424e-48	4
Abi3	1.90919	47.3	8.4	3.85095e-184	4
Runx2	1.90776	46.9	10.2	4.39994e-150	4
Rras	1.90321	64.6	39	8.39582e-69	4
Hip1	1.89505	72.6	51.5	3.39424e-69	4
H2-Q7	1.89168	70.6	49.7	1.83112e-54	4
Pbxip1	1.88952	59.6	33.7	1.06228e-62	4
Pilrb2	1.88651	59.8	32.2	1.4086e-70	4
Cebpz	1.88634	68.6	47.8	1.662e-62	4
Ptpn1	1.88547	87.9	81	2.04401e-70	4
Sik1	1.88289	60.4	38.6	1.13415e-52	4
Ripk2	1.87786	50.1	28.6	1.75071e-45	4
Gm2a	1.87747	96	83.3	1.02808e-90	4
Slc11a1	1.87571	77.9	68	3.70567e-58	4
Tsc22d4	1.87415	72.2	57.6	3.84381e-58	4
Bin2	1.87133	57.9	29.3	5.06695e-71	4
Nadk	1.87101	72	59.5	2.23364e-55	4
Dusp6	1.8565	55.7	32.5	2.36229e-45	4
Klf13	1.856	77.3	58.6	1.85702e-70	4
Clec4a3	1.849	84.3	74	1.10556e-65	4
Adipor1	1.84662	78.3	61.6	1.2936e-70	4
Rel	1.84493	95.2	83.8	6.51747e-78	4
Gpx1	1.84105	99.8	98.1	7.33358e-109	4
Vasp	1.8401	72	59.8	3.13715e-52	4
Mkl1	1.83271	55.1	26.7	6.70908e-70	4
Creg1	1.83082	90.5	82.9	1.10906e-72	4
Ets1	1.83047	37.4	8.1	1.33834e-112	4
Nrarp	1.82651	37.8	3.6	5.54264e-243	4
Il1b	1.82647	93.8	55.3	2.78169e-79	4
Thbd	1.81708	53.5	23.7	1.11618e-67	4
Klra2	1.81398	54.5	24.2	1.98062e-70	4
Ogt	1.81333	70.6	56.6	4.27843e-48	4
Ptk2b	1.8101	57.3	31.7	1.78925e-61	4
Hectd1	1.80887	78.7	66.4	2.26012e-59	4
Tmem131	1.80836	58.1	41.2	7.06709e-39	4
Cd47	1.80343	94	90.2	1.01235e-89	4
Arhgap30	1.8023	72.4	61.4	2.72033e-46	4
Hck	1.80046	64.8	42.5	1.91596e-55	4
Klhl2	1.7973	54.1	23.4	1.05011e-79	4
Zfp710	1.79383	58.6	37.8	1.1e-45	4
Nsd3	1.7927	81.3	69.5	1.24754e-63	4
Hfe	1.78955	61.8	46.1	1.91982e-39	4
Lmo4	1.77388	70.2	55.7	8.05541e-42	4
Tmsb10	1.76717	99	86.1	2.01122e-79	4
Mdm1	1.76653	37.6	7.7	3.2052e-122	4
Limd2	1.76638	54.3	29.3	3.33743e-54	4
Gm21188	1.76447	64.2	45.6	2.67503e-45	4
Pot1b	1.76352	45.5	11	4.11366e-129	4
Abcg1	1.76233	56.7	38.4	5.21488e-37	4
Cited4	1.75873	14.1	1.3	2.99741e-88	4
Trem1	1.75653	44.3	9.4	4.15325e-133	4
Sgk1	1.74996	62	38.6	8.62639e-47	4
Hsd11b1	1.74814	37.8	2.9	9.50833e-282	4
Crlf3	1.74624	70.8	58.2	1.20208e-43	4
Tkt	1.74617	86.1	78.3	2.49006e-66	4
Sf3b1	1.74513	94.4	91.2	2.78572e-87	4
Ifitm2	1.7433	99	98.3	1.82712e-89	4
Ptpn6	1.7417	69.8	58.6	4.90124e-44	4
Lyn	1.73862	90.1	84.2	1.3692e-76	4
Prkch	1.73784	51.5	25.5	3.36377e-59	4
Tmem51	1.73765	53.9	27.8	2.88116e-56	4
Arhgef10l	1.73676	63.2	45.3	6.80088e-43	4
Rps11	1.73562	100	99.3	1.93116e-147	4
Cebpb	1.73196	99.8	97.6	5.97467e-99	4
Rap1gap2	1.73007	45.5	12.2	1.74542e-114	4
Trps1	1.72684	88.1	82.1	5.18954e-56	4
Sephs2	1.72535	46.9	23.8	1.26901e-45	4
Ggta1	1.71539	52.7	28.1	8.57328e-51	4
Pgap1	1.71457	40.2	15.9	1.8815e-55	4
Fam46a	1.71046	76.1	63.7	2.94201e-31	4
Clec4e	1.70954	81.3	47.3	2.89347e-58	4
Slc38a2	1.7095	92.8	87	1.07606e-54	4
Rnf19b	1.70719	71.2	62.6	4.13273e-35	4
Rnase6	1.70675	51.5	28.1	3.78911e-48	4
Ncf2	1.70531	90.7	86.3	2.54286e-67	4
Rnf149	1.70504	88.5	77.4	4.52657e-58	4
Rps27a	1.70428	100	99.8	5.22808e-155	4
Nfatc3	1.70417	53.3	32.2	6.6668e-43	4
Mef2d	1.70315	76.9	68	6.05905e-48	4
Sh2d1b1	1.70261	39.6	10.3	7.30563e-100	4
Atp1a3	1.70019	51.9	28.6	1.72642e-48	4
Ptpre	1.69818	76.9	65.5	1.34741e-44	4
Arhgef1	1.6956	65.4	51.2	6.26275e-42	4
Ier2	1.69551	77.5	56.7	5.95637e-49	4
Ak2	1.6944	54.5	37.6	9.72292e-34	4
Spata13	1.69073	39	9.5	9.92813e-104	4
Rbm39	1.68885	97.2	94	3.02812e-91	4
Cd300a	1.68641	83.9	71.8	1.80578e-57	4
Rap1b	1.68591	99	98.1	1.55819e-108	4
Spi1	1.68376	93.2	91.2	7.37703e-66	4
Lnpep	1.68291	76.3	71.3	3.44158e-43	4
Pcnx	1.67917	42.1	23.6	1.26825e-31	4
Prdx6	1.67901	74.2	57.1	6.37071e-47	4
Mier1	1.67812	74.2	60.4	1.8255e-48	4
Gsap	1.67723	51.5	29.8	6.54912e-44	4
Bcl2	1.67526	40.2	17.7	3.9354e-46	4
Ccnd3	1.67494	59.2	37.4	2.01723e-49	4
Tln1	1.67391	86.9	83.2	1.55533e-59	4
Itgax	1.66999	47.1	23.1	8.98515e-47	4
Sec14l1	1.66993	64.4	54.2	2.50418e-30	4
Gadd45g	1.66358	58.8	44.1	2.08271e-24	4
Rps16	1.66329	99.8	99.4	4.66606e-154	4
Mkln1	1.65734	69.6	60.5	1.06765e-38	4
Nabp1	1.65702	62.4	51.2	4.20332e-26	4
Rbm5	1.65514	71.6	62.2	9.22646e-41	4
Ppp1r12a	1.65285	70.6	62	9.42059e-39	4
Lilra5	1.65185	43.3	16.8	7.79815e-59	4
Myo1f	1.65036	62.6	49.1	4.36003e-35	4
Tpd52	1.64954	90.5	87	2.38554e-54	4
Dgkh	1.64224	45.1	19.9	1.9349e-53	4
Hp	1.64204	50.5	17.5	6.22072e-72	4
Lpar6	1.6408	53.7	37.5	3.62515e-26	4
AY036118	1.63876	74.4	74.9	2.74295e-06	4
Mapkapk3	1.6332	51.5	33.9	7.65205e-34	4
Unc119	1.63164	56.7	37.7	6.5815e-35	4
Ppp1cb	1.62979	72.8	71.8	5.64012e-33	4
Rara	1.62921	61	47.8	8.98996e-32	4
Gpr132	1.6216	79.5	63.7	1.18432e-42	4
Bcl2a1a	1.62047	47.9	27.2	3.20624e-28	4
Pitpnm1	1.6203	45.9	21.9	1.8776e-50	4
Rpl3l	1.61986	31.6	2.7	1.95535e-216	4
Slc15a4	1.6175	59.6	49.4	1.98251e-23	4
Tpm4	1.60646	78.7	76.4	5.63679e-33	4
B4galnt1	1.60545	48.3	28.1	3.27867e-37	4
Pecam1	1.6054	22.5	5.1	3.4869e-58	4
Cdc40	1.60364	50.5	36.9	7.16856e-24	4
Fam107b	1.60207	63.8	44.6	3.00713e-39	4
Dedd2	1.60141	41.6	22.3	1.62622e-33	4
Nfil3	1.6009	68.6	53.6	5.41701e-32	4
Itch	1.59978	62.2	51.9	9.3714e-31	4
Cep85l	1.59904	39.8	15.6	1.45432e-54	4
Plaur	1.5972	89.5	72.5	1.65893e-47	4
Ppp1r15b	1.59708	73	64.2	1.5688e-37	4
Gapdh	1.59676	97.6	94.4	9.16479e-71	4
Pla2g7	1.59532	76.7	68	1.03989e-32	4
Retreg1	1.59325	56.1	38	3.32614e-35	4
Camk2d	1.59151	62.4	50.6	9.97072e-26	4
F630028O10Rik	1.58959	39.2	24.1	8.18004e-20	4
Cdc42ep2	1.58753	35.8	15.2	6.53058e-40	4
Mxi1	1.58655	55.5	40.2	1.53056e-28	4
Bcl2a1b	1.58556	89.7	65.2	5.2579e-54	4
Themis2	1.58168	48.9	28.3	1.16845e-37	4
Nod1	1.57986	38.8	13.5	4.06068e-63	4
Fus	1.57978	88.1	87.4	3.16302e-37	4
Coq10b	1.57895	75.9	70.7	4.38914e-31	4
Ddhd1	1.57813	44.5	30	1.80401e-21	4
Mpc2	1.57388	69.8	66	1.83901e-31	4
N4bp1	1.57374	54.9	42.3	1.10857e-20	4
Tiam2	1.57369	33.2	3.8	3.92005e-182	4
Tmem156	1.57282	33	5.2	1.03773e-133	4
D1Ertd622e	1.57256	59	48.7	8.6648e-22	4
Rpl8	1.57111	100	99.3	5.07064e-119	4
Myh9	1.56989	82.3	78.7	7.89437e-42	4
Spen	1.56875	57.7	45.8	5.99459e-25	4
Slc12a6	1.56824	58.8	43.1	2.4763e-32	4
Pmaip1	1.56814	53.5	42.3	1.0816e-16	4
Fpr2	1.56734	26.6	7.8	1.2804e-48	4
Fis1	1.56514	75.5	68.4	3.83122e-41	4
Ptp4a1	1.56508	86.3	82.7	1.97356e-41	4
Pdha1	1.56486	48.5	34.3	5.76508e-25	4
Gm15987	1.56462	34.4	14.5	1.23327e-39	4
Ncor1	1.56443	71	64.7	2.49097e-35	4
Rpl18a	1.56426	99.4	99.1	1.24391e-102	4
Grk5	1.56387	43.1	25.3	1.26e-28	4
Ehbp1l1	1.56111	60.6	49.8	1.05271e-26	4
Tmc6	1.55972	45.5	19.4	7.31225e-59	4
Tgfbr1	1.55949	58.1	42.7	2.64156e-27	4
Foxn3	1.55845	76.9	72.9	2.85492e-30	4
Clec2d	1.55776	77.3	66.6	2.93703e-33	4
Tbpl1	1.55644	46.9	32	4.00767e-23	4
Pnisr	1.5546	56.9	47.6	8.86261e-22	4
Nab1	1.55154	70.4	62	1.07382e-30	4
H2-Q6	1.55031	46.7	30.5	2.22757e-24	4
Hpgd	1.54944	63.2	59.5	2.4642e-06	4
Ap1s2	1.54874	65.8	60.7	2.15273e-22	4
Tnfrsf1a	1.54826	77.7	74.9	8.16866e-36	4
Rpl34	1.54809	100	99.1	3.76719e-113	4
Rassf3	1.54708	61	50.6	1.28043e-22	4
Nufip2	1.54142	82.1	78.3	1.17421e-35	4
Clk1	1.54049	84.1	79.7	5.51952e-41	4
Sppl2a	1.53958	72.4	70.4	1.32205e-25	4
Xiap	1.53889	65.4	58.9	1.55151e-23	4
Eif4a2	1.53725	71	67.9	3.4913e-25	4
Gch1	1.53542	69.8	65	4.13694e-22	4
Cst3	1.53387	100	99.7	6.01249e-74	4
L1cam	1.53331	34.4	12.2	3.54908e-53	4
Svil	1.5314	54.9	42.7	5.77309e-22	4
Pygl	1.53067	39.6	16.9	2.25473e-46	4
Ankrd11	1.52813	75.7	73.9	1.23646e-28	4
Bnip3l	1.52801	71	64.5	1.21699e-29	4
AB124611	1.52378	63	50.2	7.80335e-30	4
Ppp2r5c	1.52232	68.8	63.5	1.6219e-26	4
Rpl18	1.5217	99.6	98.6	1.07626e-87	4
Xylt1	1.52072	54.1	38.5	1.47597e-24	4
Fcho2	1.52042	65	62.7	1.77138e-17	4
Rps3	1.51991	99.8	98.1	8.20098e-93	4
Atox1	1.51911	95	92.3	2.16922e-50	4
Laptm5	1.51837	99.2	99.1	2.22945e-93	4
Usp32	1.51729	46.1	32	2.59769e-21	4
Ddx3y	1.51722	65.8	63.1	3.8162e-15	4
Kras	1.51505	80.3	76.7	1.68106e-32	4
Acer3	1.51407	69.2	64.4	1.26718e-26	4
Rps13	1.51389	99.8	99.2	8.70522e-104	4
Baz2a	1.51352	51.3	40.3	2.56292e-19	4
C3	1.51348	43.3	21.2	3.4572e-34	4
Kctd20	1.51282	48.9	37	4.0429e-20	4
Tnip1	1.51269	42.3	26.5	8.39975e-23	4
Ddx3x	1.51248	92	90.3	5.59036e-43	4
Rps24	1.51078	99.8	99.7	8.41154e-132	4
Mgst1	1.51025	56.5	41.7	1.2303e-19	4
Rps23	1.50956	100	99.5	1.0367e-130	4
Tgfb1	1.50952	87.5	88.7	5.29842e-31	4
Rpl9	1.50393	99.8	99.4	8.32388e-99	4
Tgoln1	0.66657	43.5	78	1.73211e-42	4
Mpc1	0.665745	28.2	67.2	7.10693e-46	4
Npc1	0.665363	28.6	68.7	1.75959e-48	4
Denr	0.665292	14.5	54.2	9.84523e-51	4
Atp6v1h	0.665269	33.8	68.7	3.68023e-39	4
Gna12	0.66443	8.9	49.3	7.99591e-56	4
Colgalt1	0.662584	23.7	63.7	7.67111e-49	4
Tanc2	0.662443	1.6	36.5	1.79458e-50	4
Tpp1	0.662383	28.4	66.4	1.32793e-46	4
Slc9a9	0.661971	6.2	44.3	1.6428e-52	4
Tuba1b	0.661698	51.3	81	5.77437e-35	4
Timd4	0.661386	1	28.5	1.24893e-35	4
Mapk6	0.661081	31.6	69.4	1.38552e-43	4
Zfp703	0.660823	47.3	75.4	3.6662e-29	4
Dot1l	0.660152	20.9	57.1	1.26876e-42	4
Tgfbr2	0.658898	36.6	65.5	5.47557e-30	4
Tomm20	0.658688	62.2	88.3	1.8537e-43	4
Specc1l	0.658242	16.3	59.4	9.58251e-58	4
Tmbim1	0.657083	18.9	62	3.22867e-57	4
Cd164	0.657042	25.2	64.3	7.96398e-48	4
Txnip	0.656961	62.8	68.9	0.00233057	4
Ppp1r14b	0.656735	27.6	68.8	1.7053e-53	4
Rtn4	0.656641	68.6	94.3	2.05519e-45	4
Fam129b	0.655196	28.6	66	1.89915e-44	4
Clta	0.654754	81.5	96.1	7.3544e-52	4
Bin1	0.654655	16.9	58.3	2.83556e-54	4
Hmgn1	0.652209	4.8	44.4	2.54478e-58	4
Atp6v1c1	0.651541	21.5	60.3	8.64536e-50	4
Dbi	0.651223	69.2	91.3	3.64081e-47	4
Ctsh	0.650985	74	94.6	6.14173e-53	4
Eps15	0.650719	22.5	60.6	8.09312e-48	4
Serinc3	0.650661	95.6	97.6	1.82492e-15	4
Cysltr1	0.65034	4.2	47.6	1.03243e-65	4
Olfm1	0.649911	5.4	45.8	9.32324e-59	4
Prcp	0.649626	59.2	87.5	6.95559e-45	4
Sbf2	0.649588	6	47.2	9.48406e-60	4
Ehd1	0.648565	53.7	83.1	8.8448e-39	4
Aph1c	0.648491	11.3	51.9	8.43343e-55	4
Oxct1	0.648062	17.3	60.3	1.98714e-60	4
Tmem251	0.647648	18.3	61	1.31807e-58	4
Blvrb	0.646904	51.3	77.4	5.26932e-31	4
Iqgap2	0.646721	11.3	55.2	4.75197e-66	4
Dstn	0.646003	44.3	81.1	3.39875e-51	4
Rassf2	0.643301	19.3	62.7	9.28855e-59	4
Slamf8	0.641092	8.5	45.5	9.43311e-50	4
P2rx4	0.640102	21.5	65.7	1.94343e-58	4
Fam46c	0.640063	6.2	37.4	3.09907e-38	4
Fgl2	0.639771	4.2	40.8	1.61019e-50	4
Mdm2	0.638628	37.4	65.7	1.80087e-28	4
Slc7a8	0.637821	5.2	49.7	3.87639e-69	4
Hexb	0.637384	37.2	68.7	2.78043e-29	4
Hbegf	0.636795	1.8	30.1	2.35522e-36	4
Snx9	0.635908	10.7	56.4	2.48651e-68	4
Gadd45b	0.63524	51.1	81.5	4.64445e-35	4
Gltp	0.634944	47.7	83.8	3.18086e-55	4
S100a1	0.634572	9.3	55.7	3.48844e-71	4
Il10rb	0.632851	34	75.9	1.613e-57	4
Mxd1	0.63247	26	51.1	2.57487e-21	4
Tmem256	0.631752	31.8	74.8	1.04877e-64	4
Gla	0.631094	22.5	62.7	1.01162e-50	4
Cebpa	0.630954	11.7	52.4	2.58809e-56	4
2310022A10Rik	0.630182	10.1	50.3	8.04647e-58	4
Comt	0.630132	12.9	59.5	1.6014e-69	4
Mfsd1	0.62855	34.6	75.4	9.74538e-55	4
Ccnd1	0.62852	1.4	36.6	1.14569e-50	4
Pcbp1	0.627752	69	93.7	7.78953e-54	4
Idh2	0.624493	4.4	48	5.11289e-68	4
Cmtm3	0.624212	11.5	61.6	5.03417e-77	4
Lrp6	0.623842	12.5	49	1.22822e-48	4
Pid1	0.623393	55.9	87.2	3.75594e-50	4
Klf7	0.622924	17.3	57.6	3.32495e-53	4
Fkbp1a	0.622001	43.9	83.2	9.61935e-61	4
2022-09-11	0.6208	26.2	66.5	5.00987e-55	4
Hspe1	0.620735	60.4	89.1	5.82278e-36	4
Pdlim1	0.620593	12.5	56	1.3054e-62	4
Bmp2	0.619572	1.4	25.6	9.70197e-30	4
Baiap2	0.618953	7.4	49.6	2.06527e-63	4
Bst2	0.618379	39	76.2	1.53094e-45	4
Gnl3	0.618048	15.3	59.5	8.39459e-63	4
Axl	0.617231	2.2	38.9	5.81616e-53	4
Zfp36	0.616892	93.4	95.8	2.37683e-12	4
Rnh1	0.616494	52.1	77.7	5.83012e-29	4
Hacd4	0.616373	21.3	65.9	2.69175e-62	4
Evi2a	0.615827	25.4	70.1	2.56693e-65	4
Tnfsf12	0.614234	10.5	57.7	5.61999e-74	4
Jdp2	0.613433	41	63.5	4.23217e-18	4
Sema4a	0.611005	15.1	58.7	7.56657e-63	4
Arhgap18	0.610196	12.9	60.2	3.35893e-71	4
Sash1	0.609846	5.8	47.8	1.92177e-62	4
Tubb6	0.609683	22.7	65.4	4.84884e-61	4
Cd84	0.608368	22.7	65.1	4.61183e-62	4
Rnf150	0.608061	3.8	47.9	7.53817e-70	4
Cttnbp2nl	0.607898	2	47.5	9.52802e-76	4
Cyfip1	0.607862	35.6	78.1	1.17986e-62	4
Scpep1	0.607195	32.2	77.6	5.99647e-69	4
P2ry6	0.606762	12.7	52.9	2.50448e-56	4
Dpysl2	0.606397	19.3	67.7	2.86361e-75	4
Rgs1	0.606249	20.9	43.5	4.39389e-17	4
Nme1	0.605978	45.7	81.8	3.32231e-58	4
Odc1	0.605592	15.9	43.8	1.5265e-26	4
Fnip2	0.604167	12.7	56.4	1.75495e-62	4
Pcyt1a	0.603949	30.2	69.1	1.73024e-50	4
Akr1a1	0.602978	69	93.5	6.29167e-55	4
Tlr2	0.602228	57.5	78.4	2.23762e-23	4
Fcgr3	0.601876	59.8	89.3	3.15075e-58	4
Myadm	0.601337	37.2	78.1	1.30388e-60	4
Kdm6b	0.601312	85.1	91.8	2.23984e-37	4
Myof	0.601026	5.8	56.8	1.98389e-86	4
Mcub	0.600855	27.8	71.4	1.31279e-64	4
Rab11fip5	0.598884	3.2	47.4	3.93696e-70	4
Antxr2	0.597931	6.6	53.9	1.62211e-76	4
Plau	0.597171	1.8	37.7	2.53147e-51	4
Mndal	0.596137	19.1	61.2	5.98418e-62	4
Itsn1	0.596	7.4	48.8	3.13278e-60	4
Slc11a2	0.59436	10.9	56.3	1.76181e-68	4
Pros1	0.594307	13.9	58.5	4.8512e-66	4
Ap1b1	0.590665	8.7	55.3	1.33051e-72	4
Hspa9	0.590182	23.5	70.5	1.70508e-74	4
Nop58	0.589759	13.1	57.5	7.84382e-67	4
Flrt3	0.589403	0.8	25.1	4.08018e-30	4
Gsn	0.58936	17.1	64	1.95168e-72	4
Tcf4	0.58873	39.2	75.3	1.27218e-47	4
Sde2	0.586183	29.4	72.3	7.98059e-64	4
Vwa5a	0.585755	6.8	56.7	1.72397e-81	4
Camk1	0.584868	8.2	56.8	1.76405e-77	4
Mtmr10	0.584668	5.8	45	1.4139e-56	4
Tspo	0.584422	63.4	91.1	5.41645e-68	4
Ifrd1	0.583792	76.3	91.2	3.67628e-40	4
Anxa4	0.583451	8.2	58.8	1.85143e-85	4
Ppp1r15a	0.582626	63.4	87.3	6.85381e-36	4
Tmem189	0.581191	45.1	79.2	1.35522e-55	4
Slco2b1	0.580587	2.4	42.7	4.26483e-62	4
Tceal9	0.57972	14.9	59.3	1.2259e-63	4
Il7r	0.579711	0.8	30.8	5.39957e-41	4
Maff	0.579046	10.7	53.5	1.0672e-63	4
Swap70	0.57863	21.9	65.1	6.49754e-63	4
Stard8	0.575205	6.2	47.8	1.50911e-63	4
Ehd4	0.574667	47.1	80	8.05308e-48	4
Srxn1	0.574039	19.5	52	3.29751e-37	4
Mfsd11	0.572446	10.7	55	3.05471e-69	4
Aplp2	0.5724	52.3	85.5	2.50922e-61	4
Pld3	0.571694	5.8	52.6	1.44237e-76	4
Furin	0.571625	47.1	77.4	4.09013e-39	4
Rhoc	0.570965	1.2	43.6	2.82769e-67	4
Ighm	0.569848	30.4	64.9	4.04354e-39	4
Myo5a	0.568217	19.1	65.3	9.68839e-74	4
Ifi27l2a	0.568053	71.4	91.1	1.79497e-33	4
Snx8	0.564328	5.4	57.2	1.26009e-89	4
Batf	0.563524	12.7	55.6	2.58155e-64	4
Got1	0.563002	29.4	69	3.26117e-56	4
Lifr	0.562949	15.1	58.6	3.7119e-64	4
Gpr34	0.559971	1	41.7	5.67141e-64	4
Tmem106a	0.559858	12.3	62.9	7.51794e-84	4
Abca9	0.559185	6.6	55.8	7.44436e-82	4
Qpct	0.559134	4.2	48	2.53475e-69	4
Fosb	0.558028	26.4	64.1	1.33691e-47	4
Anxa3	0.555899	6.4	59	4.13243e-90	4
Sh3pxd2b	0.555776	3	55.7	2.53916e-95	4
Slamf9	0.554687	12.5	58.2	1.09846e-70	4
Sqstm1	0.554582	65.2	90.2	2.19151e-52	4
Slfn5	0.55314	5.2	46.1	2.81495e-62	4
P2rx7	0.551142	8.9	45.7	4.79227e-50	4
S100a4	0.550472	86.3	92.5	1.11298e-43	4
Ly86	0.550114	55.1	91.5	7.2429e-82	4
Plekhm2	0.54967	11.5	63.8	1.81858e-88	4
Vat1	0.549423	20.3	65.6	1.61117e-73	4
Rragc	0.548327	27.8	76.2	4.2562e-85	4
Ms4a6d	0.547922	18.5	63.8	5.83017e-70	4
Gnaq	0.545823	16.3	70	3.75238e-95	4
Sgpl1	0.545768	37.2	81.3	5.33396e-78	4
Pnp	0.54549	38.8	80.1	1.04306e-67	4
Kitl	0.545021	3.4	46.7	5.58543e-69	4
Itm2b	0.542837	99	99.6	3.65068e-61	4
Csf2rb	0.542583	32.6	61.1	1.22741e-33	4
Sulf2	0.541114	12.5	58.5	3.19073e-71	4
Plxnd1	0.538143	8	60	2.57999e-92	4
Slfn2	0.538094	76.9	90.4	1.30409e-40	4
Ralgds	0.537479	5	53.3	1.521e-80	4
Nr4a3	0.535902	30.8	53.2	1.45046e-20	4
Phlda1	0.535889	18.9	55.4	3.57673e-47	4
B4galt6	0.535496	3.2	55.2	2.6633e-92	4
Rnasel	0.534259	11.7	60.4	1.46128e-79	4
Nrp1	0.533837	16.1	63.4	1.92859e-74	4
Cd209g	0.533345	1.6	29.1	2.34329e-35	4
Arl4c	0.532139	40.8	76.8	2.3078e-57	4
Naaa	0.530097	28.2	71.3	1.83857e-69	4
Pdxk	0.529695	21.3	63.5	1.06448e-60	4
Irf4	0.527827	2.4	42.2	8.82083e-61	4
Slc3a2	0.527752	56.3	90.8	1.16377e-83	4
C5ar1	0.525778	55.1	78.5	5.66736e-42	4
Ptms	0.525228	36.4	81.3	3.94152e-82	4
Adam15	0.523804	16.3	69.8	1.28886e-95	4
Gna13	0.522431	51.5	85.2	8.7947e-71	4
Unc93b1	0.521715	67.2	95.9	1.39283e-103	4
Reep3	0.520547	23.1	76.2	1.61909e-101	4
Kctd12	0.520283	62.4	90.4	3.02886e-66	4
Klf6	0.520044	91.1	98.2	7.1537e-56	4
Lgmn	0.519089	83.5	95.8	1.2537e-57	4
Hpgds	0.518694	4.6	46.5	7.92107e-65	4
Jmjd1c	0.517467	34.6	79	5.48963e-76	4
Tbxas1	0.517449	3	61.4	1.003e-113	4
Gpr183	0.517127	4.8	42.8	8.48651e-56	4
Eid1	0.516449	18.3	69.9	3.94892e-95	4
Zfhx3	0.515247	18.9	69.5	2.25539e-85	4
Ifih1	0.514399	12.1	41	5.74122e-33	4
Tspan3	0.513282	5	56.3	6.45374e-89	4
Rps27l	0.513133	58.4	88.7	5.28374e-76	4
Tnfaip3	0.511881	30.8	66.9	2.99128e-50	4
Nceh1	0.510168	11.7	61.3	1.57188e-84	4
Impact	0.509566	38	77.3	7.54119e-70	4
Npc2	0.507795	85.9	98.4	4.97616e-142	4
Gng2	0.506717	11.3	70.4	3.48105e-117	4
Serpinb8	0.506233	9.7	60	1.95496e-85	4
Cndp2	0.503338	17.7	71.9	5.57168e-104	4
Rab3il1	0.502748	2.4	57.8	1.93691e-104	4
Mmp9	0.50201	2	31.6	4.28795e-39	4
App	0.501987	48.1	90.8	3.50895e-112	4
Psd3	0.500943	2.8	54.9	1.58216e-93	4
Pea15a	0.500482	14.3	68.5	2.69989e-102	4
Ninj1	0.498308	60.2	90	3.22767e-77	4
Aif1	0.498049	26.6	75.6	2.68014e-84	4
Anxa1	0.497958	33	74.1	3.48515e-64	4
Ptgs2	0.497268	3.4	27	6.00859e-27	4
Hspd1	0.497009	38.4	74.9	4.57423e-45	4
Serpinb6a	0.495396	23.7	62.6	1.29512e-56	4
Mdfic	0.495024	13.3	69.7	8.51801e-108	4
Csrnp1	0.494993	27.6	68.4	2.20691e-64	4
Cltc	0.492925	70	95.8	7.32856e-98	4
Hilpda	0.492246	4.4	46.3	6.52501e-66	4
Dok2	0.489221	3.8	60	3.89813e-107	4
Snx2	0.488122	30	73.3	7.52721e-74	4
Hsph1	0.487957	40.6	63.8	1.26762e-21	4
Cd93	0.48715	12.1	58.5	1.89327e-75	4
Blnk	0.486985	2.8	61.3	9.97409e-113	4
Clec4b1	0.485058	11.5	55.3	5.46712e-69	4
Ifi207	0.483413	61.8	87.5	6.20361e-59	4
Gatm	0.479704	2	52.8	2.71551e-89	4
Hexa	0.47886	55.7	93	7.57462e-111	4
Trem2	0.478299	17.3	57.1	2.77365e-55	4
Lgals3	0.47572	95.6	92.4	1.34074e-17	4
Fcgrt	0.475189	35.2	67.6	1.00249e-48	4
Eif1a	0.474767	33.4	81.5	2.5775e-103	4
Tnfsf9	0.471998	11.1	52.4	1.01454e-58	4
Ckb	0.469443	26	73.7	9.14357e-90	4
Sdc3	0.466041	23.1	75.3	1.47515e-104	4
Frmd4b	0.465438	3	55.5	3.64179e-95	4
Adam8	0.462853	7.6	51.6	5.28592e-71	4
Nlrp3	0.462125	21.1	53.3	8.12418e-40	4
Fgfr1	0.460839	3	57.1	4.81578e-100	4
Cd33	0.460346	3.8	56.9	5.21059e-97	4
Ctsl	0.454973	37	78.3	1.20227e-71	4
Raph1	0.453403	17.1	69.8	1.39298e-97	4
Atp6v1a	0.45322	45.3	84.4	5.05192e-89	4
Abca1	0.452884	19.9	68.3	9.9509e-87	4
Slamf7	0.451672	10.1	63	2.06956e-94	4
Lilr4b	0.449564	54.9	91.1	3.41207e-105	4
Atpif1	0.448842	39.8	88	7.32566e-128	4
Tagln2	0.447331	59.2	94.9	2.44481e-116	4
Sdcbp	0.44682	79.7	98.1	1.83193e-127	4
Jund	0.44436	91.8	98.2	9.43909e-68	4
Ccl12	0.442624	1.4	26	3.28401e-30	4
Clec4a2	0.441338	15.9	76.8	1.22825e-130	4
Junb	0.440704	92.8	97.2	8.00301e-62	4
Pepd	0.437211	20.5	77.3	3.8296e-121	4
Tns1	0.433327	2.4	54.9	5.08892e-95	4
Glul	0.430832	30.4	75.4	9.00595e-83	4
Anxa2	0.421474	63.8	89	4.42111e-82	4
Snx5	0.419023	31.6	86	1.13536e-128	4
Ccrl2	0.417208	32.4	59.5	1.45106e-30	4
Eif4e	0.414029	35.4	80.7	1.7965e-93	4
Jun	0.407021	67.2	74.6	1.09553e-12	4
Hspa1b	0.406999	61.8	83.9	3.31237e-42	4
Anxa5	0.406251	70.4	97.2	2.317e-156	4
Igf1	0.405185	2.8	53.3	2.58741e-88	4
Oasl1	0.405134	2	36.9	4.43072e-50	4
Gas2l3	0.404873	13.1	70.1	1.81121e-116	4
Irf2bp2	0.404539	44.5	87.4	1.85967e-107	4
Trf	0.401768	38.6	82.9	3.60162e-96	4
Hspb1	0.400809	4.8	22.3	2.73767e-16	4
Ifi203	0.396754	8.2	64.8	4.71969e-108	4
Fcgr2b	0.395976	29.8	85.5	3.52433e-131	4
Nrp2	0.394174	5.6	67.3	9.75355e-126	4
Dhrs3	0.393819	5.2	72.4	4.18129e-147	4
Wwp1	0.39183	12.3	60.2	2.10538e-84	4
Rgs10	0.390946	26.4	83.2	1.02482e-134	4
Fcna	0.389852	2.8	40.5	3.88411e-56	4
Atf3	0.385989	59.4	90.1	1.74558e-86	4
Rsad2	0.384712	5	29.1	8.11051e-27	4
Ccr1	0.378546	3.8	58.4	5.83711e-101	4
Mtss1	0.377024	15.3	68.9	3.73321e-105	4
Mmp19	0.374911	2.8	39.1	5.33452e-53	4
Basp1	0.372382	17.3	63.4	9.3476e-75	4
Ctsc	0.372024	67.6	96.7	6.52174e-130	4
Egr1	0.3716	11.7	55.2	1.00809e-66	4
Rnase4	0.369432	11.9	61.3	5.46439e-89	4
Gas7	0.369333	3.8	75.9	1.66177e-167	4
Etv3	0.367485	42.7	81.7	2.7098e-93	4
Cd209d	0.366878	3	42.5	1.76125e-59	4
Mt2	0.366677	2.6	45.4	1.14644e-67	4
Rhob	0.363373	25.2	71.9	2.80157e-84	4
Marcksl1	0.361089	41	82.2	2.37554e-93	4
Cfh	0.360276	29	65.4	3.13986e-62	4
Ltc4s	0.358288	4	51.5	9.44699e-81	4
C4b	0.357414	4.2	43.6	4.62295e-60	4
Ccl6	0.356928	78.5	92.5	3.17513e-92	4
Hspa1a	0.354861	56.3	84.3	5.37493e-58	4
Ctsd	0.343695	68.4	93	9.79857e-93	4
Ccr5	0.337681	8.2	64.7	1.6141e-110	4
S100a6	0.331571	88.1	96.3	1.37876e-134	4
Clic4	0.331529	39.2	85.4	4.12456e-123	4
Ifit1	0.330982	1	26.9	5.49369e-33	4
Grn	0.329142	60	95	3.66731e-146	4
Cd209f	0.328298	3.2	33.3	9.3357e-40	4
Ccr2	0.321857	15.5	67.9	5.52241e-103	4
Thbs1	0.320495	18.3	34.6	1.84781e-11	4
Fabp5	0.317739	17.5	37.4	8.32957e-14	4
Cd209a	0.316202	2.6	44.8	8.31216e-67	4
Cd81	0.315131	29.6	81.4	9.94188e-130	4
Tgfbi	0.31429	47.7	95.8	3.52481e-174	4
Eps8	0.313406	33	85.2	1.11474e-139	4
Isg15	0.311562	7	48.1	1.74594e-63	4
Ms4a7	0.310815	4.4	58.7	4.72213e-102	4
Ednrb	0.306707	3.6	50.2	3.26576e-78	4
Stab1	0.306079	4.4	59.5	4.34353e-105	4
H2-DMb1	0.303276	17.7	78.1	2.1397e-141	4
Cxcl16	0.299523	7.4	70.9	6.87486e-136	4
Cbr2	0.293198	3.8	56.7	1.47704e-97	4
Pltp	0.292735	48.9	88.2	2.23755e-133	4
Il1rn	0.291615	9.1	47.5	3.89098e-57	4
Igfbp4	0.288122	4	59.9	3.36773e-106	4
Cd163	0.287976	3.8	54.8	3.47444e-89	4
Cfp	0.287136	17.1	80.1	8.23947e-152	4
Cstb	0.286162	45.9	93.9	2.55465e-167	4
Rab7b	0.285213	7	77.1	2.24555e-164	4
Ccl3	0.284713	35.8	63.5	5.6389e-34	4
H2-DMa	0.284193	28.6	85.6	2.85042e-157	4
Tnf	0.280459	20.3	65	6.11542e-78	4
Ptafr	0.278492	28.6	92.2	8.92955e-186	4
Cxcl1	0.277032	1.8	25.4	2.44685e-28	4
Fxyd2	0.276749	4	58.3	4.56197e-99	4
Rbpj	0.27569	31.4	90.4	6.21738e-191	4
Gdf15	0.272251	22.5	50.8	1.9153e-33	4
Clec10a	0.271528	4.8	61.4	1.41123e-107	4
Fcrls	0.269828	3.8	66.9	2.41268e-131	4
Vim	0.26093	72.2	97.4	1.56593e-164	4
Cd14	0.25686	51.7	94.3	6.59399e-129	4
Ier3	0.256249	46.7	91	3.19778e-138	4
Tmem176a	0.253923	13.7	87.3	2.9465e-196	4
Gas6	0.253585	4.2	59.6	2.5726e-105	4
Ccl24	0.249321	5.4	60.3	2.6726e-101	4
Capg	0.243855	9.5	82.9	2.28263e-189	4
Ecm1	0.242993	4.4	73.8	1.30924e-156	4
Mgl2	0.24065	4	70.9	1.8198e-144	4
Mafb	0.240365	43.5	87.1	5.30414e-127	4
Lpl	0.234083	8.7	61.6	3.02086e-98	4
Lyve1	0.233339	2.4	49.1	8.30159e-79	4
C3ar1	0.23168	6	76.7	1.3237e-166	4
Ccl9	0.231615	42.5	92.6	8.97966e-185	4
Rgl1	0.227838	6.2	75	8.71215e-157	4
Emp1	0.227266	4.4	74.6	4.63193e-159	4
Ccl8	0.225569	4.2	29.1	3.07676e-29	4
Tmem176b	0.220269	18.9	91.1	3.77495e-213	4
Ahnak	0.21481	55.5	97	7.81136e-220	4
Lgals1	0.213122	34.8	90	2.24968e-180	4
Maf	0.209781	15.7	71.5	9.9736e-122	4
Pmp22	0.206268	4.6	74.1	1.56206e-159	4
Folr2	0.205139	3.6	56.4	6.89255e-96	4
Cd74	0.19662	87.7	95.4	4.23752e-132	4
Cd63	0.194557	7	77	4.09093e-165	4
Timp2	0.193277	14.5	85.3	3.79764e-192	4
Lmna	0.192012	7.6	81.1	1.32812e-184	4
Sdc4	0.191871	4.8	71.4	1.25467e-144	4
Crip1	0.188076	81.9	98.8	3.85148e-208	4
Wfdc17	0.16897	32	92.3	2.39192e-202	4
Dab2	0.156144	4.6	79.9	4.35887e-184	4
Cxcl10	0.155836	6.8	44.5	1.94944e-56	4
S100a10	0.151583	32.2	93.5	1.88703e-218	4
Fn1	0.143222	13.7	53.9	1.21913e-68	4
Ccl7	0.128272	8.2	57.3	4.79891e-87	4
F13a1	0.125544	8.7	83.7	2.15137e-193	4
Mrc1	0.119127	6.4	85.5	2.61169e-207	4
Selenop	0.114976	52.5	91.3	8.95139e-146	4
Lyz1	0.114736	8.7	48.6	6.60508e-61	4
H2-Ab1	0.108074	41	90	3.13349e-175	4
H2-Aa	0.102719	41.2	89.2	4.92981e-176	4
Ccl2	0.100587	15.5	75.6	2.08874e-136	4
Cxcl2	0.0996886	27.6	76.1	1.38135e-115	4
H2-Eb1	0.0945102	34.8	87.6	2.08072e-172	4
Mt1	0.0855679	19.1	89.3	1.22908e-207	4
C1qc	0.0853925	9.7	79.5	4.6083e-175	4
Ccl4	0.0721631	22.5	65.3	5.66258e-80	4
C1qb	0.0696142	10.9	82.7	3.34545e-189	4
C1qa	0.0671338	9.3	79.5	1.90381e-176	4
Pf4	0.063313	12.3	77	2.05522e-157	4
Retnla	0.0411839	22.5	69.2	1.77646e-102	4
FC>1.5; pct1 or pct2>0.25; padj<0.05
FC: Cl4 vs. rest of 10 clusters combined
pct.1: Percent of positive cells in Cl4
pct.2: Percent of positive cells in rest of 10 clusters combined

## Sheet: Cl5
Gene	FC	pct.1	pct.2	p_val_adj	cluster
Ccl3	6.11241	88.8	60.7	2.12929e-99	5
Ccl4	5.62288	90.4	61.7	1.16356e-93	5
Bcl2a1b	4.52414	97.4	64.9	4.58749e-173	5
Cxcl1	4.43865	40.7	23.3	7.07212e-23	5
Cxcl2	4.3639	96.1	72.5	3.80164e-123	5
Tnf	3.61404	89.9	61.3	6.03658e-92	5
Basp1	3.50321	93	59.4	1.94054e-150	5
Cxcl16	3.49428	98	66	2.27069e-202	5
Nlrp3	3.10462	82.3	50.1	1.01829e-96	5
Tnfsf9	3.07945	74.8	48.9	9.08156e-70	5
Bcl2a1d	2.96297	84	54.1	1.27088e-86	5
Cd72	2.95983	61.3	17.2	5.67882e-157	5
Ms4a7	2.88455	84.7	54.3	6.19157e-95	5
Skil	2.87034	95.4	67	4.97546e-156	5
Cd14	2.78854	99.1	91.7	5.29735e-112	5
Tlr2	2.76434	96.5	76.3	3.23338e-127	5
Hexb	2.728	92.3	65.7	4.08778e-132	5
Ccrl2	2.68692	84.9	56.7	1.50508e-75	5
Rgs1	2.68218	62.6	41.3	5.22932e-37	5
Cxcl10	2.66874	62.6	41.5	3.77063e-26	5
Gdf15	2.6122	60.6	48.7	1.70825e-11	5
Col14a1	2.53117	59.7	7.4	0	5
Axl	2.52712	82.3	34.6	2.96194e-161	5
Tgfbr1	2.43276	76.8	41.8	8.28287e-109	5
Tnip3	2.3771	83.2	54.8	2.41794e-58	5
Pmepa1	2.36607	62.1	20.1	8.51413e-128	5
Cd9	2.33947	87.3	56.5	4.42605e-94	5
AA467197	2.32997	27.6	8	4.64152e-49	5
Id2	2.29527	82.9	71.9	4.57648e-42	5
Cd83	2.29468	99.3	87.1	1.83174e-103	5
Ch25h	2.26776	36.8	8.3	9.24234e-99	5
Rhoc	2.26493	72.9	39.8	1.67079e-87	5
Slamf7	2.24615	83.6	59	7.86241e-80	5
2010111I01Rik	2.14432	57.3	30	1.73625e-59	5
Creb5	2.08785	63.7	29.4	1.80993e-83	5
Trem2	2.07741	88	53.3	9.27697e-103	5
Clec12a	2.06831	87.7	69.4	1.59925e-85	5
Jdp2	2.05335	71.8	61.9	1.75961e-23	5
Lmna	1.98179	88.6	76.7	1.01281e-40	5
C1qb	1.97897	99.1	77.9	3.17726e-98	5
Sdc4	1.96792	93.2	66.6	1.22076e-63	5
Tnfrsf12a	1.9648	64.1	43.3	1.01935e-45	5
Icam1	1.94088	81.6	64.3	5.54938e-46	5
Cdk6	1.91281	59.7	33.7	9.01022e-55	5
Nfkbia	1.90907	96.5	89.2	3.46404e-56	5
Slfn2	1.8839	96.3	89.4	1.84625e-70	5
Cflar	1.88282	92.8	82.6	8.94019e-70	5
Gadd45b	1.88127	92.1	79.3	7.78493e-57	5
Rab20	1.87002	79	60.8	4.90242e-56	5
Nes	1.8599	38.9	5.3	2.73785e-178	5
Cx3cr1	1.84287	63.7	35.1	3.42516e-52	5
F11r	1.8049	47.9	11.3	4.54763e-129	5
Slamf9	1.7808	78.6	54.6	4.12844e-56	5
Rasgef1b	1.77992	60.4	39.2	4.86904e-36	5
Ccl12	1.77871	35.4	24.1	2.38791e-06	5
Maff	1.77809	70.2	50.3	3.92372e-44	5
Dennd4a	1.74733	83.8	69.5	3.10267e-47	5
Glipr1	1.74318	57.1	38.7	1.33591e-31	5
C5ar1	1.73961	91.7	76.5	2.45326e-50	5
Itgb5	1.72342	60.8	30.9	1.67841e-63	5
Cd86	1.71481	85.6	77.5	6.12237e-42	5
Ckb	1.7032	83.6	70.6	2.60226e-40	5
2510009E07Rik	1.69973	46.2	18.3	1.66257e-63	5
Socs3	1.69611	70.5	56	1.13756e-26	5
Bcl2l1	1.68983	56.7	31.4	2.17149e-47	5
Bcl2a1a	1.68928	42.2	27.6	1.88542e-15	5
Rraga	1.68833	64.8	49.4	2.24145e-35	5
Pdgfa	1.68769	44.9	25.3	4.38086e-26	5
Swap70	1.68686	76.4	62.2	2.95894e-38	5
Tnfaip3	1.68233	80.5	64.2	7.64916e-29	5
Cdkn1a	1.67514	92.6	87.3	1.07567e-30	5
Slc15a3	1.66902	81.2	68.1	5.08775e-36	5
Dusp2	1.66841	44	29.8	5.62493e-15	5
Hpgds	1.66601	62.6	43.4	9.02314e-26	5
Ccl2	1.64779	86	71.8	7.42584e-18	5
Gna13	1.64632	93.9	82.9	6.70061e-46	5
C1qa	1.63776	99.3	74.6	7.28101e-56	5
Ccnd2	1.63207	52.5	31.5	3.39228e-29	5
Rab7b	1.63038	88.2	72.6	7.5692e-41	5
Tgif1	1.62597	90.8	75.5	1.71271e-49	5
Icosl	1.61825	45.5	20	1.70208e-53	5
Dyrk2	1.59312	58.2	43.4	7.56927e-24	5
Dock10	1.59207	71.3	60.9	1.38331e-27	5
Anxa3	1.59158	68.1	55.6	1.24399e-29	5
Lilr4b	1.57392	95.4	88.9	6.21343e-44	5
Rel	1.56314	96.1	83.8	2.59436e-42	5
Pdgfb	1.5585	46.4	28.4	1.45839e-22	5
Cttnbp2nl	1.55436	62.1	44.2	1.8683e-31	5
Nfkb1	1.55244	95.8	87.4	5.12529e-36	5
Pik3r1	1.55154	65.4	58	1.08891e-15	5
C3ar1	1.54782	93.7	71.9	2.57782e-43	5
Cd300c2	1.54619	85.8	64.3	5.09536e-45	5
Itgav	1.54474	57.5	43	5.0963e-22	5
Fth1	1.54064	100	100	2.04587e-57	5
Hivep3	1.53713	40.9	23.5	1.71972e-24	5
Plau	1.53629	44.4	35.3	1.0138e-07	5
Myo1e	1.53531	39.4	21.1	1.32429e-28	5
Sqstm1	1.53477	91	88.8	1.27805e-26	5
Itga5	1.53358	60.4	43.7	5.51669e-30	5
Ms4a14	1.53264	29.5	9.7	2.46124e-44	5
Kdm6b	1.53109	97.8	91.1	2.58507e-36	5
Cpd	1.52904	52.1	34.7	5.54494e-26	5
Epb41l2	1.52847	77.7	66.3	1.66879e-29	5
Fam46c	1.52587	49	35.1	1.79055e-14	5
Spred1	1.5226	73.1	61.4	4.1665e-21	5
Scimp	1.52109	35.4	11.3	1.95724e-61	5
Hivep2	1.51382	72.2	63.3	1.97907e-20	5
Rapgef2	1.51299	59.1	47.2	8.28736e-19	5
Nfe2l2	1.51045	97.8	90.9	1.3389e-32	5
Nfkbiz	1.5073	91.7	81.5	2.91852e-21	5
Anxa5	1.50686	96.9	95.7	1.0389e-28	5
Rpl12	1.50452	100	97.5	1.45389e-69	5
Tank	1.50423	82.3	73.5	1.76954e-26	5
Rbms1	0.666315	74.6	91.9	2.19332e-41	5
Raf1	0.665238	25.8	52.1	1.56414e-19	5
Rgs2	0.665041	29.1	59.9	2.72949e-25	5
Zfp36l1	0.66481	68.5	77.2	7.46606e-10	5
Cebpd	0.663947	35.4	62.5	1.3953e-20	5
Nrp1	0.663921	29.1	62.5	1.6886e-32	5
Timd4	0.661316	1.1	28.4	3.13588e-32	5
Hsp90aa1	0.659934	95.8	97.9	2.87445e-12	5
Creg1	0.651869	62.6	84.3	1.54542e-29	5
Irf4	0.650853	13.8	41.5	1.26113e-25	5
Actg1	0.649815	99.1	99.7	2.17343e-33	5
Hsp90b1	0.645585	81.8	94.5	2.06854e-48	5
Timp2	0.645337	83.6	81.5	3.63613e-08	5
Mbnl1	0.642582	78.3	93.8	6.849e-47	5
Lst1	0.639413	54	71.6	5.81073e-12	5
Ctsb	0.639116	100	99.4	4.73009e-28	5
Add3	0.636234	17.3	60.5	1.12895e-55	5
Mafb	0.634099	79.4	85.1	1.34317e-12	5
Adgre5	0.63322	48.8	80.5	3.80047e-35	5
Atp1b3	0.632954	50.3	81.5	5.00974e-47	5
Dazap2	0.631971	76.6	94.2	7.06398e-52	5
Rhob	0.628607	50.3	70.4	6.1229e-17	5
Naaa	0.626913	36.8	70.7	9.78903e-41	5
Aldh2	0.626045	49.7	81.3	4.66412e-45	5
Nupr1	0.624283	19.5	54.5	2.03588e-35	5
Rgl1	0.616921	56.2	72.2	4.42725e-16	5
Ppp2r5a	0.61664	42	71.4	1.90135e-25	5
Fam46a	0.613853	32.4	65.9	3.67827e-32	5
Sulf2	0.612798	23.6	57.8	1.21282e-37	5
Clec4d	0.60822	19.9	48.4	5.90667e-24	5
F10	0.607152	2	28.2	5.64304e-30	5
Napsa	0.603283	32.2	52.6	1.62739e-15	5
Ap2a2	0.600162	38.7	75.8	2.81439e-51	5
Emb	0.599032	31.9	69.3	2.82428e-42	5
Adam8	0.598048	21.2	50.7	4.69317e-31	5
Trim25	0.595601	38.3	74	3.8528e-44	5
Aplp2	0.593597	56	85.1	2.10893e-52	5
Hspa1b	0.592623	75.5	83.1	4.17255e-12	5
Gm42418	0.58993	100	99.9	6.21114e-19	5
Grn	0.589071	86.2	93.5	5.5475e-32	5
Glul	0.588325	53.4	74.1	1.11825e-23	5
Serpinb6a	0.587633	36.8	61.7	2.7919e-25	5
Gpcpd1	0.584295	20.4	59	1.13338e-44	5
Rnf149	0.583589	56.7	79.1	1.21216e-30	5
Rsrp1	0.583469	65.6	88.2	3.22895e-43	5
Mgl2	0.583155	46.4	68.4	1.18943e-23	5
Lyz2	0.580664	98.2	99.8	1.37037e-50	5
Ms4a6c	0.578177	52.5	78.4	5.90629e-39	5
Rnasel	0.577025	18.2	59.9	1.2512e-54	5
Dusp5	0.575307	21.2	54.3	1.2721e-33	5
Tns1	0.573948	19.7	53.8	2.31789e-38	5
Prdx5	0.571139	67.6	82.1	6.51072e-21	5
Snx2	0.566935	42.9	72.5	1.16402e-37	5
Ifi27l2a	0.566931	76.4	90.8	6.58357e-34	5
Zfp36l2	0.56194	70	90.8	6.18254e-46	5
Mgst1	0.552968	5.3	44.3	1.37145e-51	5
Ccr1	0.55189	17.1	57.5	4.39611e-49	5
Tsc22d3	0.550314	28.2	68.2	3.08748e-50	5
Fcgrt	0.548897	49.2	66.8	6.96828e-22	5
Pla2g7	0.546458	23.9	70.7	2.91888e-65	5
Sat1	0.544838	93.7	97.7	3.01555e-39	5
Slc16a3	0.536753	32.2	51.9	2.46147e-15	5
Cd209g	0.536299	1.8	29	5.58331e-32	5
Stk17b	0.529694	47.9	78.6	3.13536e-45	5
Clec4e	0.528701	23	50.4	1.4279e-23	5
Fabp4	0.526751	9.6	26	1.49882e-10	5
Btg1	0.524156	91.2	94.5	1.83674e-34	5
Cdk2ap2	0.523478	29.3	70.1	1.1063e-57	5
Emilin2	0.523013	37.6	78.2	6.21421e-64	5
Slc7a11	0.518482	31.9	50.8	4.6703e-14	5
Samhd1	0.515315	44.9	82.9	3.58016e-69	5
Fgfr1	0.509559	9.4	56.5	9.39821e-72	5
Ctsd	0.508254	82.1	92.2	9.8822e-34	5
Wwp1	0.506512	26.5	59.3	1.44006e-40	5
Tmcc1	0.503926	39.8	75.9	1.49557e-51	5
Mmp9	0.503789	2	31.5	9.14104e-36	5
Cfh	0.496603	49.2	64.2	3.84816e-21	5
Lpl	0.488263	40.9	59.7	7.60029e-15	5
Mrc1	0.484417	76.8	81.5	2.77021e-29	5
Gm2a	0.481904	61.5	85.1	2.88675e-58	5
Ccl9	0.47908	68.1	91	6.84822e-69	5
Cd36	0.479013	57.8	84.5	1.48285e-53	5
Tmsb10	0.4758	85.3	86.8	5.34202e-18	5
Mmp19	0.473348	9.2	38.6	9.00017e-32	5
Psap	0.470913	99.6	99.7	2.21302e-115	5
Igfbp4	0.465963	34.4	58.1	3.70071e-31	5
Csf2rb	0.465892	22.3	61.5	1.35949e-53	5
Smpdl3a	0.465074	28.7	70.4	1.55881e-61	5
Pltp	0.451437	67.6	87.1	3.30405e-63	5
Ecm1	0.449434	40	71.7	1.37097e-51	5
Itgal	0.443857	3.1	33.4	3.70857e-36	5
Ltc4s	0.439002	15.3	50.7	2.79564e-45	5
Msrb1	0.433708	31.9	59.5	4.16797e-28	5
Klf4	0.429173	43.3	77.6	5.17839e-58	5
Fxyd2	0.428305	32.2	56.6	1.79764e-28	5
Cbr2	0.4252	18.2	55.8	9.95181e-51	5
Gsr	0.419086	14	46.3	7.07954e-38	5
Cytip	0.417919	41.1	61.4	2.66113e-29	5
Hmox1	0.411567	82.3	95.4	2.06421e-59	5
Ear2	0.405435	3.5	40.9	2.95027e-49	5
Fcna	0.404336	4.4	40.3	8.02202e-47	5
Gas6	0.398797	31.7	58	4.86983e-39	5
Ly6e	0.389685	54.7	76.9	7.05959e-51	5
Txnip	0.389394	30.2	70.5	1.77222e-62	5
Ifitm6	0.388859	4.4	59.7	1.20735e-94	5
Cd163	0.378923	16.4	53.9	4.55627e-50	5
Maf	0.366811	46.6	69.7	5.80477e-41	5
Cd209d	0.362137	3.5	42.3	5.4398e-54	5
Fabp5	0.361236	13.1	37.5	7.10686e-20	5
C4b	0.360386	5.5	43.4	5.11122e-52	5
Cd209a	0.354901	4.2	44.6	2.56213e-55	5
Cfp	0.351904	30.6	79.1	3.0865e-105	5
Selenop	0.344644	89.7	89.3	3.96242e-23	5
Gda	0.32548	18.6	78.3	6.61574e-128	5
Cd209f	0.316202	2.6	33.2	6.68629e-38	5
Ifitm3	0.311492	84	97.7	1.73637e-128	5
Wfdc17	0.3111	62.4	90.5	2.95267e-107	5
Ednrb	0.300466	3.5	50	2.01634e-72	5
Clec10a	0.300359	11.6	60.8	4.59218e-81	5
Klf2	0.294899	30.2	74.6	4.41914e-81	5
Ccl24	0.269364	8.5	59.9	1.29505e-86	5
Jun	0.266393	38.7	76	3.08933e-65	5
Lyve1	0.241943	4.8	48.8	8.4204e-67	5
Fn1	0.234576	21.9	53.3	1.50955e-41	5
Folr2	0.225772	13.1	55.7	3.20906e-69	5
Lyz1	0.218362	23.9	47.6	5.73969e-22	5
Ccl8	0.217544	3.9	29	2.24507e-27	5
Plac8	0.199646	1.5	30.5	2.76127e-35	5
F13a1	0.182856	25.6	82.5	9.78235e-137	5
Ccl6	0.178404	49	93.9	1.75354e-179	5
Thbs1	0.158296	7.7	35	1.62363e-30	5
Retnla	0.0827007	33.7	68.4	5.77925e-67	5
FC>1.5; pct1 or pct2>0.25; padj<0.05
FC: Cl5 vs. rest of 10 clusters combined
pct.1: Percent of positive cells in Cl5
pct.2: Percent of positive cells in rest of 10 clusters combined

## Sheet: Cl6
Gene	FC	pct.1	pct.2	p_val_adj	cluster
Spp1	30.3101	88.3	14.8	0	6
Fabp5	23.4207	96	33.6	2.06413e-297	6
Gpnmb	15.998	92.5	4.4	0	6
Ctsd	7.8556	100	91.3	4.82737e-224	6
Lgals3	4.90093	100	92.2	7.23416e-180	6
Trem2	4.8659	99.1	52.9	3.93427e-241	6
Fabp4	4.7913	65.3	23.3	3.17392e-108	6
Syngr1	4.35045	79.2	5.7	0	6
Lgals1	4.0856	99.3	86.5	3.20669e-160	6
Lhfpl2	3.83844	86.7	10.6	0	6
Ctss	3.82267	100	98.9	5.564e-224	6
Ctsl	3.74967	97.9	75.1	1.57232e-118	6
Psap	3.61654	100	99.6	3.94522e-206	6
Sgk1	3.54734	81.7	37.8	5.77723e-126	6
Ctsb	3.28349	100	99.4	4.48364e-209	6
Pld3	3.23271	96.5	47.9	3.50904e-211	6
Cd63	3.17094	98.4	72.2	1.04097e-155	6
Akr1a1	3.1543	100	91.8	1.57105e-195	6
Apoe	3.07834	98.4	87.3	4.24541e-89	6
Mpeg1	2.89882	99.5	81	7.02344e-173	6
Hexb	2.87211	97.9	65.5	1.95054e-157	6
Psmb6	2.83899	97.4	71.3	1.16113e-154	6
Plin2	2.8254	99.8	87.4	3.5631e-137	6
Aprt	2.78585	95.8	63.2	7.22694e-152	6
Cstb	2.77714	99.5	91	1.10453e-144	6
Prdx1	2.58839	100	96.4	9.91671e-113	6
Pgam1	2.58431	94.8	72	5.90348e-111	6
Cd68	2.54608	99.1	91.2	2.7175e-147	6
Gde1	2.4741	88.5	32.6	2.84027e-193	6
Ftl1	2.35688	100	100	1.81146e-160	6
Lpl	2.3461	76.8	58	9.11399e-24	6
Cd9	2.30973	89.7	56.5	1.8972e-79	6
Mif	2.30057	95.6	71.6	3.47248e-112	6
Esd	2.28297	94.8	72.4	2.63669e-101	6
Ms4a7	2.20866	86.2	54.4	1.22841e-60	6
Basp1	2.17518	96	59.3	1.21965e-97	6
Cyba	2.1524	99.8	98	5.53602e-131	6
Txn1	2.11615	97.9	88.3	1.5727e-93	6
Lgmn	2.11449	100	94.9	3.96598e-130	6
Atp6v1g1	2.09466	99.8	89.8	2.28315e-138	6
Ctsz	2.04142	100	97.1	6.18349e-148	6
Pdpn	2.01731	41.2	11.2	1.62895e-78	6
Soat1	2.01395	97.2	65.8	2.57293e-115	6
Rnh1	2.00798	93	75.6	9.66283e-62	6
Il7r	2.00022	70	27.3	8.09384e-90	6
Atp6v0d2	1.99997	39.8	5.1	1.9055e-181	6
Cd300c2	1.98823	97.2	63.8	1.5477e-100	6
Creg1	1.95348	99.3	82.5	6.35646e-95	6
Vat1	1.93616	91.3	61.9	5.0403e-82	6
Mpc1	1.92225	92.7	63.8	2.16176e-99	6
Uap1l1	1.90438	82.9	38.3	7.81088e-122	6
Fnip2	1.8924	90.4	52.4	8.56697e-95	6
Grn	1.88755	99.3	92.9	3.62531e-96	6
Vegfa	1.86997	45.9	15.8	1.42988e-62	6
Thbs1	1.86887	67.9	32.1	1.40934e-48	6
Nceh1	1.86259	94.8	57	2.37092e-104	6
Fth1	1.85913	100	100	8.23019e-110	6
Tcirg1	1.8524	92.7	53.3	1.07748e-116	6
Gapdh	1.8478	99.3	94.4	2.14418e-76	6
Lamp1	1.84148	100	97.9	3.52741e-132	6
Capg	1.83185	93	78.4	2.35574e-46	6
Samd8	1.82201	84.3	44	5.06801e-98	6
Atp6v1c1	1.80091	91.6	56.7	5.78067e-91	6
Lat2	1.80005	88.1	54.4	8.04264e-82	6
Psmd8	1.79477	92.7	74.8	3.37324e-67	6
Bhlhe41	1.79452	62.1	20.1	1.7876e-100	6
Cd93	1.78959	90.9	54.4	6.76913e-83	6
Acp5	1.78925	47.1	11.2	2.35881e-106	6
Cotl1	1.78842	98.4	92	1.50488e-75	6
Ap3s1	1.78018	89.5	59.8	1.69565e-89	6
Fam20c	1.78004	66.3	15.5	1.28909e-176	6
Itgb5	1.77854	78.7	30.2	6.04104e-116	6
Npc1	1.77769	93.9	65.3	7.28421e-93	6
Pdia6	1.77406	87.4	75.1	3.41193e-48	6
Hebp1	1.77363	63.9	8.7	2.15783e-288	6
Abca1	1.76056	90.6	64.6	1.46398e-53	6
Anxa4	1.75989	85.5	54.8	5.15582e-80	6
Adam8	1.7501	86.4	47.6	9.15883e-70	6
Cox5b	1.74843	98.4	86.6	7.44156e-98	6
Lipa	1.74003	95.6	76	4.7377e-66	6
Hexa	1.73829	99.1	90.6	7.58291e-94	6
Ndufb8	1.73725	93	73.2	2.14715e-80	6
Tmem65	1.73338	83.8	36.2	4.13602e-114	6
Nme1	1.73051	94.4	79.3	7.86416e-64	6
Mcfd2	1.72675	77.8	45	2.68399e-57	6
Vdac2	1.72286	96	76	3.99582e-90	6
Anpep	1.7216	53.6	13.2	5.08855e-133	6
Atp5g1	1.72016	91.3	74.6	1.01439e-61	6
Ndufc1	1.71319	91.3	63.5	7.19365e-77	6
Ldha	1.70856	93	79.9	3.80152e-52	6
Ctsa	1.6961	97.9	89.4	5.87959e-82	6
Calr	1.69298	97	92.9	2.01608e-41	6
Ssr4	1.68944	96	79.7	2.87569e-75	6
Wfdc17	1.68823	97.9	88.7	2.85054e-27	6
Vim	1.67865	100	95.9	3.02221e-55	6
Anxa5	1.67802	99.8	95.6	2.72001e-76	6
Tmem256	1.66865	93	71.6	1.91981e-81	6
Lrp12	1.66735	67.4	19.1	9.87542e-141	6
Ndufa4	1.66684	98.1	89.1	5.93466e-75	6
Lrp1	1.66374	95.6	81.4	2.83507e-73	6
Sdf2l1	1.65788	72.6	49.8	1.51145e-41	6
Vps29	1.65652	89.2	67.1	3.59807e-66	6
Anxa1	1.65446	89.5	71.1	8.35601e-25	6
Gdf15	1.65444	74.7	48.1	9.26728e-24	6
Mmp19	1.65368	61.6	36.1	6.16167e-25	6
Ctsh	1.63554	99.8	93.2	4.92132e-81	6
Sec61g	1.63034	99.1	90.2	6.59728e-75	6
Ndufc2	1.62264	96	74.5	2.25027e-85	6
Hilpda	1.62183	61.6	43.3	1.64364e-16	6
Sptssa	1.61553	89	61.7	1.77182e-64	6
Aldoa	1.61433	96.3	83.2	1.30366e-56	6
Dnmt3a	1.60645	77	44.4	2.79747e-53	6
Rgs1	1.60496	70.7	41	2.51102e-34	6
Cd84	1.60457	93.2	61.4	6.70935e-72	6
Gabarap	1.60146	100	98.3	1.629e-120	6
Amdhd2	1.59654	72.4	30.3	2.18753e-91	6
Rgcc	1.59546	40.7	25.3	3.80736e-12	6
Trappc2l	1.58961	86.7	53.6	4.90876e-78	6
Gusb	1.58838	88.1	63.6	1.32444e-60	6
Abcg1	1.58654	75.6	37.7	2.72289e-67	6
Sec61b	1.5853	98.8	89.1	2.19872e-68	6
Aph1c	1.58528	83.8	48.2	3.05933e-63	6
Itga6	1.58428	55.3	11.2	1.86422e-157	6
Anxa3	1.58401	88.1	54.7	2.42903e-60	6
Slc37a2	1.58142	72.4	25.7	1.1739e-109	6
Uqcrb	1.57973	97.9	86.9	9.38943e-80	6
Slc6a8	1.57667	46.1	6	6.66066e-206	6
Atp6v0e	1.5712	98.8	92.1	1.29379e-73	6
Osbpl8	1.56842	89.9	63.2	1.87606e-50	6
Plgrkt	1.56544	80.6	40.8	1.14355e-82	6
Cebpa	1.56391	81.5	48.7	2.31016e-50	6
Aif1	1.5637	91.6	72.1	1.65786e-35	6
Ndufs5	1.5635	85.5	60.5	6.59892e-62	6
Cd300a	1.56281	94.8	71.4	2.37263e-51	6
Elob	1.56178	97.2	86.5	4.00282e-61	6
Rpn1	1.56013	83.4	61.1	5.78513e-40	6
Atp5g2	1.55875	98.4	90	2.4458e-73	6
Cipc	1.55809	64.2	17.8	1.29806e-132	6
Timm13	1.55805	91.3	66.6	5.66467e-64	6
Gpr137b	1.55556	89.5	54.5	2.23398e-66	6
Spcs2	1.5553	93.4	74.9	1.36275e-50	6
Cox5a	1.55498	97.2	87.4	2.31689e-68	6
Bri3	1.55127	99.3	93.4	8.63227e-72	6
2010107E04Rik	1.55088	98.1	84.6	7.51024e-65	6
Gpx4	1.55029	98.1	87.3	1.22701e-61	6
Spcs1	1.54951	92.7	67.2	1.30128e-65	6
Eaf1	1.54783	72.8	32.8	1.9522e-76	6
Lamtor4	1.54763	93.7	68.7	2.47609e-59	6
Pdia3	1.54743	95.3	81.9	1.0863e-45	6
Odc1	1.54544	65.6	41.3	1.27532e-27	6
Ndufa12	1.54281	79.6	54.4	1.05446e-48	6
Atp6v1a	1.53966	98.8	81.6	2.27275e-54	6
Ftl1-ps1	1.53862	92.3	72.1	4.3902e-57	6
Csf2rb2	1.53722	55	23.8	3.8091e-54	6
Ctsk	1.53145	38.9	2.3	0	6
Ndufab1	1.53123	85	56.3	1.49588e-59	6
Ndufb6	1.52906	84.1	56.4	5.86062e-58	6
Tbcb	1.52662	84.1	58	1.2851e-54	6
Jag1	1.52561	45.4	14.4	1.64255e-67	6
Plpp3	1.52433	26.9	2.3	1.1363e-162	6
Csf2rb	1.52113	86.7	58.3	7.15055e-33	6
Npc2	1.51902	100	97.6	3.88535e-85	6
Cndp2	1.51697	90.6	68	1.85612e-50	6
Rps2	1.51511	99.5	98.6	1.14278e-79	6
Fam129b	1.51316	90.4	62.8	6.09908e-51	6
Ptpre	1.51299	84.8	65.3	8.23307e-31	6
F7	1.51211	34.4	3	2.9928e-213	6
Rcbtb2	1.50875	73.5	32.2	2.04859e-73	6
Lasp1	1.50867	87.8	63.8	2.91813e-43	6
Fam129a	0.666426	34.2	62.4	5.64223e-36	6
Chka	0.665808	38.4	49.6	4.10094e-09	6
Kdm7a	0.665741	68.6	76.4	9.12341e-26	6
Cxcl1	0.665443	13.3	24.6	0.000647714	6
Hexim1	0.664908	38.4	58.9	1.63178e-25	6
Jup	0.664516	23.9	54	3.53492e-37	6
Nr3c1	0.664316	49.9	63.4	1.83042e-21	6
Nav1	0.663763	43.1	65.1	1.80519e-33	6
Hspa8	0.663371	99.8	99.6	1.97669e-47	6
Akap13	0.663266	87.1	87	6.30015e-27	6
Cbfa2t3	0.661926	19.9	44.5	1.55467e-22	6
Csf1r	0.661172	96	94.6	4.96451e-27	6
Atf4	0.660716	90.9	90.9	6.0547e-31	6
Slc20a1	0.66067	38.4	56.5	1.87531e-17	6
Mylip	0.659527	41.7	55	3.05838e-12	6
Cd74	0.658449	97.9	94.8	2.87143e-10	6
Pros1	0.657909	37.2	57.1	8.07083e-25	6
Ets2	0.657892	60.4	71.2	2.21465e-19	6
Tfrc	0.657811	18.7	42.5	1.8825e-22	6
Dusp5	0.657557	48.9	52.9	0.00435087	6
Rps27	0.656769	100	99.6	3.76219e-65	6
Gas7	0.656496	63.2	72.5	5.85739e-24	6
Parp14	0.655889	34.9	53.7	1.779e-19	6
Frmd4b	0.65583	41.2	53.3	1.24127e-13	6
Vps37b	0.655318	70.5	72.7	2.49979e-12	6
Ubc	0.655173	99.3	99.2	8.31841e-30	6
Ltb4r1	0.653905	7.5	36.5	6.82648e-32	6
H2-Eb1	0.653728	91.1	84.5	1.35675e-07	6
Add3	0.652325	31.6	59.7	6.82123e-39	6
Klf3	0.652201	49.9	64.5	8.53518e-23	6
Cdkn1b	0.649929	20.8	43.8	9.72692e-21	6
Clec4a1	0.649398	49.9	74.6	2.51692e-35	6
Pdlim1	0.64873	26.5	55	1.69239e-34	6
Pmaip1	0.64827	13.1	44.3	9.6715e-34	6
Cdk2ap2	0.648197	60	68.5	7.36095e-16	6
Itga4	0.647711	48.2	65	6.95682e-22	6
Celf2	0.646396	77.8	83.6	3.02313e-37	6
Cks2	0.644871	41.7	53.2	9.7961e-09	6
Ints6	0.642949	39.8	57.8	6.91161e-21	6
Marcks	0.641971	95.8	95.8	7.71046e-35	6
Rnasel	0.640891	37	58.8	1.46134e-25	6
Ptprc	0.640343	94.4	95.5	1.50553e-39	6
Srsf5	0.638991	77.8	84.9	6.03237e-41	6
Stk40	0.638132	48.5	66.8	1.91869e-31	6
Adrb2	0.637563	13.3	42.2	4.20825e-29	6
Kpna4	0.636156	74.7	78.5	1.36786e-25	6
Icam1	0.635278	51.1	65.8	3.20618e-17	6
Bmp2	0.634954	3.5	25.3	1.01657e-20	6
Tcf4	0.630072	68.4	73.6	7.13058e-19	6
Il6ra	0.62992	45.9	68.7	2.48642e-37	6
Spred1	0.628082	41.7	63	1.02659e-27	6
Ccnd2	0.623902	4.9	33.8	1.85399e-31	6
Rassf4	0.620701	54.3	76.2	3.48672e-45	6
Snx2	0.620343	66.7	71.3	1.88898e-17	6
Plbd1	0.619118	51.5	67.7	3.20783e-27	6
Nr4a2	0.618768	22.5	44.5	4.73497e-19	6
Mndal	0.617335	29.5	60.4	2.7373e-39	6
Foxp1	0.615747	79.2	86.5	2.90425e-45	6
Foxn3	0.61569	54.3	74	2.64719e-40	6
Sbno2	0.615115	65.8	75.9	6.41997e-30	6
Birc3	0.614982	49.2	72	1.02222e-38	6
Naaa	0.613942	53.6	69.8	2.67302e-32	6
Nfkb1	0.61383	84.5	88	8.23958e-28	6
Gmfg	0.61311	82	89.9	6.98779e-54	6
Irf1	0.612351	20.8	49	5.01818e-30	6
Ppp1r10	0.612084	45.7	65.4	2.91022e-33	6
Man1a	0.612039	61.6	74.1	3.08306e-27	6
Dennd4a	0.612013	58.3	70.8	1.08146e-23	6
Herpud1	0.61128	30.9	61.8	1.38708e-42	6
Nfe2l2	0.610973	88.5	91.4	6.69541e-39	6
Pnrc1	0.610432	83.6	88	3.74074e-39	6
Coro1a	0.609906	93.9	91.8	8.50296e-32	6
Hmgb2	0.609501	58.5	71.6	1.02029e-23	6
Gpr132	0.608325	51.5	65.1	1.55308e-23	6
Ahr	0.608086	45.2	61.7	3.41975e-23	6
Tob2	0.607937	79.9	84.8	4.27928e-42	6
Mbnl1	0.606328	92.5	93.1	3.8881e-58	6
Traf1	0.606246	27.9	48.5	1.5242e-20	6
Zcchc6	0.606131	66.3	77.5	6.27653e-40	6
Abca9	0.605865	19.4	54.8	2.26504e-46	6
Cst3	0.60433	99.8	99.8	1.75736e-64	6
Sema4a	0.603738	24.4	58	7.55418e-46	6
Cd300ld	0.60345	41.9	63.6	6.9565e-28	6
Hnrnph1	0.602668	72.8	81.7	8.06334e-43	6
Slamf9	0.602012	27.9	57.1	5.0481e-36	6
Fus	0.601314	81.5	87.7	3.08713e-49	6
Ddx3x	0.599412	89.9	90.4	1.65753e-42	6
Tle3	0.598916	41.9	66.6	2.59284e-41	6
Jarid2	0.59832	43.1	67.6	1.7056e-39	6
Zfp36l2	0.597575	85	90.1	2.42426e-31	6
Myadm	0.597468	59	76.7	1.5336e-47	6
Rgs2	0.597272	39.6	59.3	6.78433e-20	6
Zbtb20	0.596991	41.5	63.9	2.33075e-31	6
Zfhx3	0.596803	52.7	67.5	2.96407e-29	6
Tiparp	0.596796	73.8	82.7	1.93915e-37	6
Cited2	0.595867	38.2	58.9	7.51837e-22	6
Kitl	0.594967	14.8	45.8	2.11196e-36	6
Nfkbid	0.594176	24.4	54.5	1.48895e-37	6
Irf4	0.593764	11.7	41.5	6.24877e-32	6
Mtss1	0.592564	62.8	66.2	6.91683e-14	6
Wsb1	0.59194	79.2	84.9	2.13454e-35	6
Hivep2	0.591103	37.2	65	6.10309e-46	6
Fosl2	0.589781	70.5	81.9	5.67516e-38	6
Crip1	0.589582	99.5	97.8	9.67675e-29	6
Psd3	0.589314	21.8	53.6	7.32158e-41	6
Clec4b1	0.587132	32.6	54	8.24176e-24	6
Ssh2	0.585959	33	62.2	2.29037e-39	6
Slc38a2	0.58466	77.3	87.8	2.28111e-48	6
Slc5a3	0.584417	19.4	47	9.28539e-29	6
Insig1	0.582922	40	62.5	1.27277e-30	6
Csrnp1	0.580438	52	67	8.67439e-24	6
Ctsc	0.578961	97.2	95.1	8.76868e-39	6
Nupr1	0.578556	27.6	54	5.7655e-31	6
Tmem176a	0.576116	60	84.5	1.83533e-47	6
Fos	0.574574	68.9	79.9	3.83296e-27	6
Ifi207	0.574447	83.6	86.2	4.10721e-27	6
Hsp90ab1	0.573305	99.5	99.2	5.58279e-67	6
Cd86	0.57243	62.1	78.7	5.4253e-47	6
Cd209g	0.571422	5.9	28.7	4.16869e-21	6
Runx1	0.57092	77	84.9	1.19587e-46	6
Ehd4	0.570814	70.7	78.6	5.22566e-34	6
Srgn	0.570311	97	96.6	7.58938e-29	6
Ear2	0.568416	15.5	40.2	1.36798e-20	6
Kctd12	0.566325	82.9	89.2	2.12333e-42	6
Ccr2	0.566262	44	66.1	1.89383e-24	6
Ccl12	0.564552	13.3	25.2	3.07057e-05	6
Pid1	0.56346	67.9	86.4	3.10695e-62	6
Samsn1	0.562015	40	59.3	7.74933e-24	6
Bach1	0.560529	83.6	90	3.11304e-47	6
Hpgd	0.560236	32.1	61	6.45227e-32	6
Cbr2	0.559776	43.6	54.5	1.75262e-12	6
Ccl6	0.559754	85.5	92	1.51034e-38	6
Ccl9	0.556084	73.8	90.7	2.03822e-55	6
Malat1	0.554611	99.8	99.8	1.08344e-59	6
Cxcl2	0.550997	68.4	73.8	6.30542e-08	6
Mmp9	0.550795	6.6	31.2	1.15659e-23	6
Trps1	0.550423	67.9	83.1	1.25552e-54	6
Tppp3	0.547614	31.6	61.1	1.51442e-35	6
Bag3	0.546161	50.6	61.9	3.39609e-17	6
Ifi203	0.545322	34.9	63.1	1.79876e-37	6
Tmem176b	0.544195	60.7	88.5	2.68124e-60	6
Ifih1	0.539549	20.1	40.4	3.47989e-17	6
Dusp16	0.537297	15	46.4	6.1726e-36	6
Ccnl1	0.536785	85.7	91.8	4.95007e-72	6
Samhd1	0.530817	71.7	81.5	1.59581e-48	6
Nfkbia	0.527307	78.2	90	5.86152e-47	6
Stat3	0.525586	86.2	91.4	5.20255e-78	6
Ighm	0.523906	37.9	64.3	7.6906e-36	6
Ier5	0.52261	87.8	93.3	2.95424e-52	6
Zfp36l1	0.521725	67.4	77.2	3.23049e-29	6
Atf3	0.517994	84.1	88.7	1.09968e-28	6
Cfp	0.517507	74.5	76.9	1.39308e-34	6
Hspd1	0.515954	72.1	73	1.51431e-10	6
Mef2c	0.514631	56.4	75.6	4.8328e-47	6
Lifr	0.513351	15.5	58.3	4.62895e-65	6
Ltc4s	0.51068	30.9	49.9	4.28169e-20	6
Tmcc1	0.509224	58.1	74.9	4.2917e-39	6
Fgfr1	0.507001	14.5	56.1	1.36013e-61	6
Dnajb1	0.505413	48	66.1	8.35848e-30	6
Rbpj	0.501159	83.6	87.5	4.81443e-66	6
Pf4	0.497597	83.8	73.1	2.7935e-06	6
Tnfsf9	0.49745	23.4	51.4	1.25403e-31	6
Oasl1	0.497252	13.1	36.1	2.18431e-19	6
Peli1	0.496312	58.5	78.9	2.90163e-49	6
Phlda1	0.496204	29.3	54.7	1.14459e-29	6
Nr4a3	0.495689	34	52.9	1.08288e-18	6
Ier2	0.492206	23.9	59.4	1.38266e-49	6
Eps8	0.48766	66	83.2	9.40332e-53	6
Mat2a	0.486944	71.7	86.1	4.15604e-62	6
Fcrls	0.484464	46.6	64.4	1.98385e-29	6
Lsp1	0.478159	77	84.3	3.71508e-57	6
Fcgrt	0.47787	46.6	66.8	2.26901e-35	6
Ecm1	0.476073	65.1	70.4	2.03653e-28	6
Fam46a	0.471639	35.8	65.7	1.34507e-46	6
Cytip	0.46497	47.1	61	5.97909e-20	6
Etv3	0.461458	72.6	80	7.19847e-44	6
Igfbp4	0.460199	37.2	57.9	3.66047e-28	6
Ifi27l2a	0.460152	81.7	90.5	4.25256e-53	6
Serinc3	0.457962	94.8	97.6	3.43902e-65	6
Klf6	0.455929	98.1	97.8	1.4618e-70	6
Cebpd	0.45488	25.8	62.8	2.84324e-57	6
Sdc4	0.454014	57.4	68.4	4.06937e-23	6
Pou2f2	0.449097	28.3	57.6	2.90906e-39	6
Isg15	0.449047	26.9	46.9	1.93877e-16	6
Klf4	0.445409	58.8	76.7	4.03722e-39	6
Gas6	0.444153	46.1	57.2	2.66726e-20	6
Ppp1r15a	0.443157	73.8	86.6	1.65275e-65	6
Cd83	0.441527	83.8	87.9	2.76245e-49	6
Jund	0.436576	97.4	97.9	2.6917e-58	6
Tnip3	0.432537	38.9	57	3.59281e-24	6
Kdm6b	0.432387	85	91.8	1.27618e-81	6
Stk17b	0.431771	54.8	78.2	1.03374e-65	6
Fcna	0.430865	11.5	39.8	8.43676e-31	6
Dusp1	0.424618	86.2	94	5.27435e-75	6
Mt2	0.424169	14.8	44.5	3.1366e-33	6
Nr4a1	0.422408	24.8	59.9	1.22826e-47	6
Dnaja1	0.415221	93	93.7	8.46747e-71	6
Maf	0.410578	65.1	68.8	1.15199e-20	6
Rsad2	0.406267	13.1	28.5	9.85878e-10	6
Mt1	0.404962	93.7	85.2	1.13326e-19	6
Junb	0.404776	92.3	97.2	1.25683e-68	6
Ly6e	0.401227	65.8	76.3	6.29034e-39	6
Ifitm2	0.400796	95.6	98.5	2.74671e-126	6
Stap1	0.399327	26.2	61.6	1.75327e-55	6
Dab2	0.397052	67	76.4	7.85622e-42	6
Ccl7	0.397036	46.8	55.1	7.55375e-06	6
Cd209d	0.396503	7.5	42	5.06369e-41	6
Egr1	0.395069	23.9	54.3	1.22441e-35	6
Ednrb	0.392195	23	49	3.48965e-30	6
Rel	0.390668	63.9	85.4	6.44799e-83	6
C4b	0.388217	11.2	43	1.75819e-37	6
Ifitm6	0.388026	7.5	59.4	4.75264e-85	6
Btg2	0.387309	32.8	75.8	1.16342e-84	6
Fxyd2	0.385473	26.9	56.8	3.31794e-38	6
Ifit1	0.384598	4.7	26.6	6.05799e-20	6
Gda	0.367997	41.5	77.1	1.62301e-91	6
Ccl2	0.364195	66.7	72.7	5.95834e-15	6
Tnf	0.363903	37	63.9	9.65735e-41	6
Cd209f	0.360377	7	32.9	4.43709e-26	6
Clec10a	0.355232	33	59.6	5.46364e-41	6
Cd209a	0.3487	8	44.2	5.06876e-45	6
Marcksl1	0.347365	47.1	81.6	4.25298e-83	6
Txnip	0.34559	36.3	70.1	2.72501e-61	6
Jun	0.34457	66.7	74.6	1.02459e-22	6
Il1b	0.344493	43.3	58	6.49106e-17	6
Klf2	0.343506	41.2	73.9	9.33116e-56	6
Cd163	0.337967	12.4	54	1.38391e-56	6
Nfkbiz	0.3372	47.3	83.7	1.92676e-99	6
Folr2	0.334606	40	54.3	1.54656e-23	6
Ccl24	0.332734	22.2	59.1	4.38277e-54	6
Zfp36	0.32887	89	96	4.77128e-94	6
Ccl8	0.325987	11.7	28.5	3.81383e-11	6
Mgl2	0.319574	25.5	69.3	7.82179e-80	6
Mrc1	0.31888	70.5	81.8	2.55277e-65	6
Cfh	0.316257	34.2	64.9	2.09375e-56	6
Hsp90aa1	0.310492	98.4	97.8	1.46012e-81	6
Cd81	0.306525	32.3	80.9	3.04951e-112	6
F13a1	0.305479	65.1	80.4	3.03993e-61	6
Hsph1	0.302634	38.4	63.7	1.54032e-41	6
Lyz1	0.279204	41.5	46.7	0.00304356	6
Lyve1	0.268529	10.5	48.3	7.71477e-51	6
Ifitm3	0.262746	87.4	97.5	1.54569e-141	6
Plac8	0.239507	6.1	30.2	9.12508e-24	6
Cxcl10	0.214507	15	43.9	4.79643e-30	6
S100a8	0.207828	34.2	9.1	7.9235e-53	6
Hspa1a	0.167172	60.2	83.9	5.12123e-76	6
Hspa1b	0.128844	51.1	84.2	6.7463e-94	6
Ccl4	0.12882	48.2	63.8	2.26734e-25	6
Retnla	0.0808772	36.8	68.2	3.80111e-62	6
FC>1.5; pct1 or pct2>0.25; padj<0.05
FC: Cl6 vs. rest of 10 clusters combined
pct.1: Percent of positive cells in Cl6
pct.2: Percent of positive cells in rest of 10 clusters combined

## Sheet: Cl7
Gene	FC	pct.1	pct.2	p_val_adj	cluster
Cd209a	5.29524	97	40.9	6.86684e-156	7
Wnt11	4.57111	90.9	19.2	1.10723e-248	7
Il1b	3.59769	90.2	56.3	1.29072e-71	7
Nr4a3	3.02233	89.5	50.8	1.16742e-73	7
Tnip3	2.99473	97.3	54.8	2.63375e-106	7
Cd74	2.9021	100	94.8	2.29499e-141	7
H2-Ab1	2.86753	100	87	1.60057e-140	7
H2-Eb1	2.86141	100	84.3	4.40803e-132	7
Klrd1	2.59855	68.2	8.5	2.13372e-263	7
Ccl5	2.51044	29.7	15.9	2.98424e-07	7
H2-Aa	2.48237	100	86.2	6.40795e-122	7
Avpi1	2.44625	80.7	34.5	4.17089e-89	7
Rel	2.38287	100	83.9	1.63238e-100	7
Bcl2a1d	2.31903	91.9	54.4	2.58715e-64	7
Csf2rb	2.31659	94.6	58.5	1.55142e-76	7
Gm2a	2.29768	99.7	83.5	1.04773e-98	7
Ccr7	2.29372	32.8	3.3	4.98602e-135	7
Ramp3	2.28469	57.1	11.3	1.48639e-128	7
Cytip	2.27894	98.6	59.2	5.55101e-82	7
Itgb7	2.26523	93.6	33.3	8.36342e-139	7
Got1	2.24557	95.6	66	2.28175e-84	7
Flrt3	2.18267	53.7	22.8	5.17759e-38	7
P2ry10	2.12682	55.7	7.3	3.31792e-193	7
Traf1	2.10371	89.2	46.2	4.4502e-73	7
Klrb1b	2.09707	62.8	6.9	3.88602e-259	7
H2-DMb1	2.06833	99	74.2	4.27138e-80	7
Rps27l	2.06716	95.6	86.8	7.357e-43	7
Dennd4a	2.05704	97	69.3	7.23186e-61	7
Jak2	2.04429	84.5	39.4	2.55473e-86	7
S100a11	2.03451	99.7	82.1	1.88401e-71	7
Clec4b1	2.03195	93.2	51.7	2.54426e-74	7
Cd52	2.02888	99.7	85	4.56586e-74	7
Ckb	2.016	95.3	70.4	1.16545e-65	7
Lsp1	2.0156	100	83.5	1.00382e-86	7
Napsa	2.00464	97.6	50.1	6.09864e-87	7
Sub1	1.98935	99.7	93.3	5.69082e-75	7
Crem	1.97026	83.4	47.5	9.85601e-54	7
Il7r	1.96498	68.2	28	3.49505e-57	7
Etv3	1.95922	99	79.1	9.48001e-62	7
Plbd1	1.95133	98.3	66	6.96922e-81	7
Gpr132	1.94545	97.3	63.4	3.02399e-73	7
Mgl2	1.93858	84.1	66.8	4.90014e-28	7
Tmsb10	1.92965	99.7	86.3	3.23956e-59	7
Syngr2	1.92043	91.2	61.4	7.07292e-65	7
Rnh1	1.89795	95.9	75.7	1.53879e-51	7
Vps37b	1.87409	93.9	71.9	9.91956e-41	7
Arl5c	1.86685	75.7	42.5	1.85436e-40	7
Rplp0	1.8623	100	98.7	3.71358e-97	7
Actg1	1.84384	100	99.7	2.64997e-84	7
Rps11	1.84353	100	99.4	4.35694e-102	7
Ltb4r1	1.83891	83.8	33.6	1.28465e-84	7
Ccr5	1.83059	89.5	60.8	6.62813e-41	7
Nr4a2	1.82949	78.4	42.4	1.51212e-44	7
H2afz	1.82379	100	98.1	1.93163e-55	7
Map4k4	1.82081	90.9	69.9	1.44296e-38	7
Rpl28	1.82021	99.7	99	2.51725e-110	7
H2afy	1.8187	95.6	72.1	3.12618e-66	7
Rps7	1.7784	100	98.6	5.413e-90	7
Map3k14	1.77689	67.2	32.4	5.72784e-45	7
Lmo1	1.77025	69.3	18.6	1.77239e-120	7
Ccnd2	1.76698	64.9	31.4	5.61991e-39	7
Rpl21	1.76681	100	98.6	1.9456e-89	7
Atox1	1.75747	99.7	92.2	4.58406e-65	7
Rpsa	1.75046	100	99.3	3.71406e-97	7
Cd9	1.75011	96.3	56.8	2.10655e-55	7
Tmsb4x	1.749	100	100	5.24045e-109	7
Rpl15	1.74485	100	97.5	1.27808e-90	7
Jdp2	1.73678	82.4	61.7	8.0839e-26	7
Pde4b	1.73605	90.9	57.2	4.73481e-50	7
Bhlhe40	1.72433	75.7	43.4	5.83991e-34	7
Spag9	1.71579	99.7	88.7	9.80964e-59	7
Crip1	1.71496	100	97.8	2.34919e-47	7
Cd80	1.70774	64.2	27.6	1.57164e-53	7
Rpl32	1.70055	100	98.6	4.23028e-77	7
Myo1g	1.69519	87.8	53	3.58214e-54	7
Eif5a	1.69214	99	89	8.41741e-59	7
Rpl39	1.68908	99.7	99.2	2.28146e-92	7
Rpl13	1.68741	100	99.5	1.26256e-93	7
Anxa2	1.68483	99.7	87.3	2.46424e-35	7
Ahr	1.67496	86.5	60.2	2.02564e-31	7
Rpl14	1.67292	100	97.6	3.30814e-95	7
H2-DMa	1.66907	100	82.1	2.45658e-54	7
Rps4x	1.6636	100	99.3	2.70191e-96	7
Stap1	1.66095	85.1	59.2	2.00604e-29	7
AI504432	1.65919	70.6	34.3	2.77156e-47	7
Pfkp	1.65518	87.2	59.7	2.16193e-38	7
Rps18	1.65441	99.7	98.5	3.32937e-71	7
Rps5	1.65261	100	98.7	4.00389e-79	7
Lrrfip1	1.65229	92.6	65	7.04101e-43	7
Tspan13	1.64813	76.4	39.5	1.58477e-46	7
Arap2	1.64457	44.6	8.4	1.07177e-100	7
Malt1	1.64039	79.7	51.5	2.20154e-27	7
Rps16	1.63992	100	99.4	2.16679e-86	7
Siglecg	1.6381	37.8	5.6	1.7542e-108	7
Stat5a	1.63716	58.1	22.9	7.66258e-53	7
Nfkbie	1.63562	80.4	45.7	4.7836e-43	7
Dusp5	1.63507	87.2	51.6	9.55432e-40	7
Rpl12	1.63175	99.7	97.5	5.50754e-73	7
Rps15a	1.63148	99.7	99	4.02492e-85	7
Srgn	1.63056	100	96.5	1.38651e-60	7
St8sia4	1.62754	69.6	60.1	4.50474e-07	7
Fyn	1.62265	79.1	40.3	1.10947e-51	7
Rps6	1.61865	99.7	97.5	1.44069e-69	7
Rps2	1.61512	100	98.6	2.90626e-78	7
Rpl18	1.60572	100	98.6	6.01087e-69	7
Batf	1.60535	79.1	52.5	8.57313e-29	7
Runx3	1.60051	74	38.5	1.11094e-41	7
Rps13	1.59539	99.7	99.2	1.6958e-81	7
Rpl18a	1.59269	99.7	99.1	3.46871e-69	7
Baz1a	1.59047	94.6	76.8	3.98526e-35	7
Rps26	1.58904	100	99.4	5.40324e-80	7
Txnrd1	1.57945	95.3	77	3.11712e-32	7
Fam46c	1.57647	62.2	34.9	1.27e-22	7
Cd24a	1.57512	61.5	24.6	3.08497e-47	7
Tmem176a	1.57233	98.3	82.9	3.77439e-33	7
Rpl19	1.56812	100	99.3	2.58686e-78	7
Rpl4	1.56021	99.7	93.9	9.20916e-55	7
4930523C07Rik	1.55398	67.6	30.7	8.72738e-47	7
Rpl17	1.55324	100	99.2	1.03717e-73	7
Klrk1	1.55233	42.9	11.3	3.39231e-63	7
Gm47283	1.54754	80.4	53.8	5.46625e-24	7
Rpl11	1.54661	99.7	98.6	5.36963e-70	7
Rps3	1.54602	99.3	98.2	2.46051e-55	7
Agpat4	1.54078	86.5	49.9	7.9326e-46	7
Rpl6	1.53656	99.7	98.7	5.84279e-64	7
Etv6	1.53395	82.4	51.6	1.22135e-37	7
Pmaip1	1.53326	71.3	42	5.29796e-28	7
Atp5d	1.53271	97.3	82.2	3.35275e-38	7
Rpl8	1.53195	100	99.3	2.54876e-70	7
Rpl29	1.53123	100	95.9	3.97337e-53	7
Rpl36a	1.52935	99.7	96.9	1.69043e-58	7
Cenpa	1.52586	66.2	43.4	1.70708e-20	7
Rps19	1.52278	99.7	99.1	7.14502e-61	7
Mefv	1.51794	68.9	29.3	5.8472e-51	7
Rpl24	1.51596	99.7	98.8	3.27531e-67	7
Rab11fip1	1.51195	80.4	46.7	1.67727e-32	7
Akap13	1.51046	96.6	86.7	5.30857e-19	7
Rpl27a	1.50672	100	99.7	1.02012e-70	7
Idh2	0.665784	13.9	46.7	5.51215e-26	7
Ppp1cc	0.665559	37.8	57.6	8.7579e-15	7
Mtmr10	0.665119	22.3	43.6	2.60339e-12	7
AC160336.1	0.664988	71.3	79.9	4.73072e-05	7
Man2a1	0.664929	20.6	52.4	5.05188e-24	7
Laptm4a	0.664611	73.6	83.9	1.36902e-25	7
Hbegf	0.664105	6.8	29.3	1.47236e-13	7
Ms4a6d	0.663951	37.2	62.2	1.2791e-16	7
Pros1	0.663364	34.5	56.9	6.12837e-17	7
Slc7a8	0.66318	14.9	48.4	8.88724e-28	7
Tmem50a	0.661816	81.4	89.5	7.95967e-31	7
Eps15	0.661801	40.9	59.2	2.4531e-14	7
Irf1	0.660572	24.3	48.5	2.62533e-14	7
Tlr7	0.660103	8.8	44.3	9.84451e-30	7
Celf2	0.659687	72.3	83.7	4.3409e-22	7
Nisch	0.659451	43.2	67.3	2.19696e-21	7
Pla2g15	0.659081	11.1	45	1.09459e-27	7
Fam111a	0.658988	36.8	63.5	1.38528e-20	7
Zfp703	0.65773	58.8	74.4	1.24071e-12	7
Samhd1	0.657587	73.6	81.3	1.93293e-12	7
Neu1	0.657273	39.5	64.9	1.77448e-23	7
Atp6v1b2	0.656529	66.9	79.4	5.95934e-20	7
Dusp6	0.65432	6.1	34.6	1.47055e-20	7
Tcf4	0.65422	66.6	73.6	1.32823e-10	7
Slc20a1	0.65337	35.5	56.3	4.50176e-13	7
Cxcr4	0.650129	74.7	86.5	7.31995e-13	7
Adrb2	0.649919	19.3	41.6	5.73663e-12	7
Sec14l1	0.649023	29.1	55.6	2.82318e-22	7
Rab31	0.648306	31.8	61.5	3.37322e-26	7
Asah1	0.647327	69.3	83.1	7.9237e-29	7
Cbl	0.646592	52.4	73.7	5.62432e-24	7
Tceal9	0.645747	35.8	57.6	1.86813e-15	7
Frmd4b	0.644944	31.4	53.4	1.02762e-14	7
Pcyt1a	0.644574	44.9	67.8	6.11545e-19	7
Cd300lb	0.644541	17.2	50.8	2.37408e-25	7
Hes1	0.644482	5.4	26.1	7.36687e-12	7
Aldh2	0.644006	65.5	80.2	5.17547e-24	7
Clec12a	0.643932	51	70.9	2.72081e-18	7
Apobec1	0.642804	37.5	64.5	2.12416e-21	7
Grina	0.642606	33.4	59.3	5.2659e-22	7
Mat2a	0.642519	83.1	85.6	7.20212e-12	7
Plau	0.64226	9.8	36.6	1.28274e-17	7
Rhoc	0.642074	14.2	42.3	2.12757e-19	7
Cd164	0.641477	38.5	63	4.32587e-22	7
Bmp2	0.638938	2.7	25	4.0328e-14	7
Clec4a3	0.638185	56.4	75.1	7.07242e-24	7
Fcgr1	0.637711	9.5	44.1	9.52229e-28	7
Bri3	0.637568	89.9	93.8	6.12838e-32	7
Ifi27l2a	0.63506	83.8	90.3	1.02771e-11	7
Cln8	0.634278	35.5	63.9	4.61848e-26	7
Fcgr3	0.63427	68.2	88.3	5.41042e-27	7
Mmp19	0.632397	24.7	37.6	0.0233288	7
Gpx1	0.632018	98	98.2	2.55441e-32	7
Abhd12	0.62993	41.2	67.5	6.40181e-30	7
Cd68	0.629804	91.6	91.5	5.22912e-24	7
Cd84	0.629137	34.5	63.8	9.94901e-28	7
Cyp4f18	0.629121	35.8	59.5	4.85792e-16	7
Unc93b1	0.628335	91.9	94.5	1.169e-39	7
Rab11fip5	0.626919	11.5	46.2	1.50994e-29	7
Hexa	0.624781	88.9	91.1	2.26363e-31	7
Fam46a	0.623238	46.3	64.9	3.86806e-12	7
Soat1	0.620754	41.9	68	4.60535e-24	7
Aif1	0.620271	57.1	73.5	2.29617e-18	7
Tmem106a	0.619929	33.1	61.1	4.0458e-27	7
Cx3cr1	0.618336	13.5	37.3	2.77868e-14	7
Kctd12	0.615545	80.1	89.2	1.18193e-22	7
Cltc	0.614849	92.2	94.5	9.14049e-30	7
Sulf2	0.613199	36.8	56.7	1.05769e-16	7
Msr1	0.610592	9.8	47.3	4.18285e-32	7
Ptpre	0.610148	40.5	67	4.64076e-24	7
Rin2	0.610042	13.2	44.7	2.80041e-24	7
Rbms1	0.609693	81.4	91.4	8.31544e-36	7
Bag3	0.609476	50	61.8	3.82026e-06	7
BC005537	0.606977	91.6	95.5	6.86085e-33	7
Pld3	0.606023	16.9	51.2	9.65687e-31	7
Gns	0.604993	44.3	72.1	1.6216e-34	7
Lifr	0.604012	32.1	57.1	6.45687e-21	7
Junb	0.60356	98.6	96.9	1.51687e-07	7
Sash1	0.603377	8.8	46.8	4.0442e-33	7
Cebpd	0.602712	43.2	61.7	7.56201e-15	7
Calm2	0.600276	95.3	96.2	1.09863e-45	7
Rgs2	0.60023	36.1	59.1	3.62648e-15	7
Kitl	0.600223	10.1	45.5	1.6386e-28	7
Lrp6	0.598752	13.2	48.2	7.99208e-30	7
Anxa3	0.598691	16.9	57.5	3.48453e-37	7
Man1a	0.597677	55.4	74.1	1.04619e-20	7
Gpr34	0.597392	8.1	40.6	7.3272e-26	7
Tcn2	0.596677	22	57.1	1.0266e-33	7
Cybb	0.59658	93.9	97	1.77721e-30	7
Qk	0.594464	75.3	88	1.08027e-34	7
Stard8	0.593711	12.5	46.7	4.71814e-29	7
Mfsd11	0.593431	21.6	53.6	1.81729e-29	7
Slco2b1	0.593289	3.4	41.8	1.74978e-33	7
Aplp2	0.592887	72.3	84.1	5.90755e-29	7
Myo5a	0.592839	34.8	63.8	7.34405e-31	7
Hacd4	0.592812	33.4	64.6	2.5122e-32	7
Prdx5	0.59259	77.7	81.5	3.44377e-08	7
Irf8	0.591959	17.9	55.9	5.22512e-34	7
Clec4a1	0.59085	49.3	74.2	4.66183e-31	7
Camk1	0.590649	15.2	55.5	1.7021e-38	7
Atp2b1	0.590242	93.9	97.8	6.84976e-41	7
Ccr1	0.590205	34.8	56.2	5.02236e-12	7
Tpp1	0.588353	33.4	65.4	1.7282e-35	7
Cited2	0.588088	33.8	58.7	3.63784e-17	7
Nupr1	0.587636	24	53.7	5.87299e-22	7
Slc43a2	0.587318	20.3	58.5	2.75582e-37	7
Ms4a6b	0.586452	30.1	62.3	5.37255e-27	7
Ets2	0.586348	46.6	71.5	2.30083e-24	7
Itsn1	0.58621	11.1	47.8	1.09369e-32	7
Clec4d	0.585795	32.8	47.5	7.52543e-06	7
Mgst1	0.582885	9.8	43.5	2.27708e-25	7
Ctsa	0.578997	77.4	90.2	2.42555e-43	7
Nr3c1	0.578306	32.1	63.8	1.21408e-32	7
Pdxk	0.577108	42.6	61.9	2.93273e-16	7
Sh3bp5	0.575057	8.8	49.7	3.46882e-38	7
Mef2a	0.573387	63.9	83.9	8.04447e-36	7
Mpp1	0.571719	24	62	3.28422e-40	7
Atf3	0.568479	83.4	88.7	1.31048e-15	7
Rab20	0.568451	29.7	62.7	4.12479e-30	7
Mfsd1	0.567275	47.6	74.1	4.9621e-38	7
Hmox1	0.565797	82.8	95.2	1.32285e-19	7
Cndp2	0.565531	39.2	70	2.75936e-39	7
Psd3	0.559201	12.5	53.5	6.31049e-38	7
Metrnl	0.559117	66.9	85.9	8.19871e-33	7
Dse	0.554827	23.6	60.2	9.7076e-38	7
Sdcbp	0.554384	97.3	97.2	5.89815e-46	7
Zfp36l2	0.553893	68.6	90.5	4.98716e-29	7
Vsir	0.552477	43.6	76.5	3.23314e-48	7
Pltp	0.552049	77.4	86.4	1.63475e-23	7
Cd163	0.549319	50	52.2	0.0477793	7
Hsp90aa1	0.54833	100	97.8	2.74271e-05	7
Tmcc1	0.547348	45.6	75	1.25769e-28	7
Ier5	0.547154	92.2	93.1	1.2543e-24	7
Tpd52	0.546839	74	87.6	2.85825e-33	7
Zfand5	0.546537	89.5	93.4	3.96173e-36	7
Clec4e	0.543397	31.4	49.6	1.8169e-07	7
P2rx7	0.542674	13.5	44.8	5.99833e-25	7
Gas7	0.542421	46.3	72.9	5.83212e-38	7
Snx5	0.541958	65.5	83.7	1.67164e-40	7
Gsr	0.541949	28.7	45.3	1.19694e-06	7
Adgre1	0.54065	100	100	5.94682e-67	7
Zfhx3	0.539438	38.2	67.7	1.00583e-32	7
Fyb	0.538857	45.3	75	4.64164e-34	7
Ier3	0.537152	85.1	88.8	5.8927e-16	7
Rgs10	0.534719	61.8	80.8	6.77179e-36	7
Cd209g	0.534477	2	28.5	3.22174e-19	7
Slc11a1	0.53434	28	69.8	3.69399e-49	7
Smpdl3a	0.533059	47.6	69.1	8.15057e-20	7
Hspd1	0.530844	67.9	73.1	2.5462e-07	7
Hpgds	0.529088	10.1	45.4	2.46706e-30	7
Ifi204	0.526422	37.8	72.2	1.35781e-39	7
Cd93	0.524502	23	57.1	6.56427e-31	7
Atp6v1a	0.521475	68.6	82.8	2.12465e-34	7
Nrp1	0.520391	27	62	4.57158e-39	7
Lair1	0.520302	7.8	53.7	8.90259e-47	7
Mylip	0.520079	23	55.4	1.09855e-28	7
Jund	0.519167	98.3	97.9	1.974e-22	7
Mmp9	0.517971	3	30.9	3.30992e-20	7
Tlr2	0.517727	56.4	78	3.75647e-27	7
Sirpa	0.513624	67.6	89.2	8.67886e-58	7
Mef2c	0.51294	54.1	75.4	3.26144e-32	7
Ninj1	0.51154	76.4	88.8	8.30221e-40	7
Cd300ld	0.510336	25.3	63.9	2.29215e-41	7
Cd33	0.509324	15.2	55.3	7.07454e-40	7
Fcgrt	0.50863	58.1	66.2	5.85096e-14	7
Ecm1	0.507703	43.6	71.1	2.39438e-24	7
Tgfbr2	0.504243	31.4	65	4.87879e-39	7
Sat1	0.501192	95.3	97.6	2.96414e-35	7
Dhrs3	0.500473	31.8	70.1	7.72776e-50	7
Serpinb8	0.499506	14.9	58.7	2.82256e-47	7
Ccl12	0.498312	5.1	25.3	3.89701e-11	7
Ehd4	0.490477	56.4	78.9	2.86816e-40	7
Tns1	0.484967	14.9	53.3	1.85048e-37	7
Tgfbi	0.483567	86.8	93.5	2.89281e-53	7
Fabp4	0.480762	13.5	25.6	0.00315976	7
Fos	0.480595	58.8	80	9.24025e-26	7
Gm42418	0.480423	100	99.9	9.8023e-19	7
Ccl6	0.471822	87.8	91.9	1.83606e-30	7
Zfp36	0.471481	97.3	95.6	4.14717e-24	7
Rab7b	0.469713	44.9	74.3	1.42298e-36	7
Ifi207	0.467936	72	86.6	1.69493e-36	7
Msrb1	0.467232	43.9	58.6	2.40389e-09	7
Klf4	0.467006	59.1	76.5	6.68904e-24	7
Cebpb	0.46527	91.6	97.9	1.27686e-45	7
Hpgd	0.460156	24.3	60.8	8.58192e-36	7
Ighm	0.459535	32.4	64.1	2.34717e-35	7
Pla2g7	0.453972	18.9	70.1	5.503e-61	7
Abca1	0.453093	27.4	67	4.16072e-47	7
Trem2	0.452554	17.2	56.2	4.17601e-36	7
Snx2	0.448361	39.9	72.1	1.87095e-46	7
Cd81	0.447502	58.8	79.3	3.52178e-41	7
Lyz2	0.441997	99.7	99.7	3.09485e-63	7
Hsph1	0.437971	55.1	62.8	9.72137e-08	7
Zfp36l1	0.434644	62.5	77.2	1.68764e-29	7
Blvrb	0.433774	39.9	77.2	2.79566e-59	7
Plac8	0.427	17.9	29.4	0.0206505	7
Ctsc	0.416833	89.9	95.3	8.46537e-62	7
Lpl	0.416306	29.1	59.8	1.62546e-22	7
Igf1	0.415592	6.8	52.1	5.28601e-46	7
Fcna	0.414269	10.1	39.5	1.32112e-22	7
Glul	0.402772	41.2	74.1	4.1063e-48	7
Lst1	0.40277	33.8	72	1.78647e-45	7
Mtss1	0.402439	30.4	67.2	3.031e-47	7
Mrc1	0.397758	83.4	81.2	4.17675e-26	7
Txnip	0.392873	42.9	69.4	9.16196e-35	7
Lamp1	0.392189	88.5	98.3	7.17427e-115	7
Cfh	0.388874	51.7	63.9	7.93812e-20	7
Lyz1	0.37984	26.7	47.1	2.62611e-09	7
Rgl1	0.378938	51.7	72.1	1.44078e-32	7
Ltc4s	0.377036	9.1	50.3	1.23701e-39	7
Serpinb6a	0.375193	15.9	62	2.18215e-53	7
Lgmn	0.372623	87.2	95.4	1.18341e-66	7
Ms4a7	0.36617	10.8	57.3	1.32012e-46	7
Tnf	0.362831	32.4	63.6	1.66516e-26	7
Wwp1	0.362453	11.5	59.2	3.38772e-54	7
Itm2b	0.361644	98	99.6	1.79914e-96	7
Ctsl	0.359253	40.5	77.3	4.43449e-57	7
Ccl3	0.356044	33.8	63	1.15815e-21	7
C4b	0.349003	5.4	42.7	1.76743e-33	7
Plin2	0.347859	58.4	88.9	4.28706e-70	7
Grn	0.33538	78	93.7	2.50298e-83	7
Klf2	0.334913	44.9	73.3	1.51337e-35	7
Rnase4	0.334539	9.5	60.3	2.99467e-59	7
C3ar1	0.32906	28.4	74.4	1.15853e-63	7
Stab1	0.325083	11.5	58	8.43388e-52	7
Dab2	0.324767	59.5	76.5	5.90426e-41	7
Egr1	0.322887	17.9	54	1.06105e-34	7
Cd209f	0.316942	2	32.7	4.32303e-24	7
Ednrb	0.313812	7.1	49.1	1.46631e-40	7
Rhob	0.311644	31.1	70.7	9.48243e-54	7
Igfbp4	0.307104	11.8	58.4	3.67161e-52	7
Cbr2	0.304827	8.8	55.4	3.01264e-50	7
Fxyd2	0.304688	19.3	56.6	2.66862e-39	7
Cd63	0.303619	36.5	74.5	3.20531e-56	7
Thbs1	0.289791	17.2	34.2	3.67883e-07	7
Timp2	0.276765	51.7	82.5	3.64318e-72	7
Pmp22	0.27584	24	71.9	3.6546e-66	7
Ly6e	0.269053	39.5	77	1.42963e-58	7
C5ar1	0.267353	18.6	79.2	1.32079e-89	7
Ctsd	0.264845	60.8	92.7	3.7892e-87	7
Ccl8	0.260897	5.4	28.5	7.05699e-15	7
Serinc3	0.257626	88.5	97.8	1.01238e-101	7
Csf1r	0.256729	56.8	95.8	1.17955e-123	7
Gas6	0.25554	9.5	58.2	6.71037e-56	7
Ctsb	0.254906	96.6	99.5	1.0031e-128	7
Hspa1a	0.245289	70.9	83.2	2.07275e-30	7
Ccl24	0.243812	10.8	58.9	4.88764e-54	7
Cxcl2	0.243557	41.9	74.6	5.67448e-38	7
Hspa1b	0.236157	76.7	82.9	2.22893e-26	7
Lyve1	0.232738	3.4	48	3.76967e-44	7
Retnla	0.212589	53.4	67.2	5.29541e-17	7
Folr2	0.206799	9.1	55.1	2.43888e-49	7
Cd36	0.205605	27.4	85	7.87333e-100	7
Maf	0.191862	14.2	70.4	1.12597e-75	7
Ccl2	0.190983	44.6	73.4	5.41614e-40	7
Gdf15	0.178659	15.2	50.4	2.89898e-30	7
Mafb	0.172115	34.1	86.5	4.83171e-97	7
Jun	0.168099	41.6	75.3	7.66955e-52	7
F13a1	0.166344	35.1	81.2	2.07754e-85	7
Ccl7	0.160709	17.9	55.9	4.77204e-36	7
C1qb	0.155028	33.1	80.4	2.89268e-79	7
C1qc	0.126748	26.4	77.4	3.33121e-83	7
C1qa	0.120479	28.7	77.3	7.33493e-80	7
Selenop	0.120271	74.7	89.8	5.80301e-74	7
Apoe	0.109271	45.9	89.2	4.89896e-93	7
Pf4	0.0875394	28.7	75	1.03417e-73	7
FC>1.5; pct1 or pct2>0.25; padj<0.05
FC: Cl7 vs. rest of 10 clusters combined
pct.1: Percent of positive cells in Cl7
pct.2: Percent of positive cells in rest of 10 clusters combined

## Sheet: Cl8
Gene	FC	pct.1	pct.2	p_val_adj	cluster
S100a9	132.316	100	8.8	0	8
S100a8	108.56	99.3	7.5	0	8
Retnlg	21.7385	80.8	1.4	0	8
Hdc	11.4673	95	5.7	0	8
Slpi	9.10088	94.7	14.2	0	8
Il1r2	8.97322	90.4	8.8	0	8
Ifitm1	8.21599	79	20.4	2.01119e-164	8
Clec4d	6.7859	97.2	45.5	1.32261e-157	8
Csf3r	6.38721	94.3	26.2	7.08153e-220	8
G0s2	6.38175	68	5.7	0	8
Lcn2	5.66773	49.5	1.1	0	8
Mxd1	5.52079	96.4	48.4	2.03293e-139	8
Msrb1	4.86441	97.5	56.9	2.16069e-120	8
Slc7a11	4.75819	97.2	48.5	1.96483e-116	8
Gm5483	4.67567	32.4	0.5	0	8
S100a11	4.65882	99.3	82.1	9.9928e-104	8
Cxcr2	4.59368	73.7	1.5	0	8
Grina	4.55858	96.1	57.4	8.129e-127	8
Sgms2	4.45844	87.5	18.9	1.65348e-219	8
Wfdc21	4.24614	57.3	0.8	0	8
Lmnb1	4.10916	92.5	30.5	2.46289e-163	8
Stfa2l1	4.04232	41.3	0.5	0	8
Acod1	3.99545	68.7	13	4.1987e-160	8
Sorl1	3.9611	88.3	24.6	2.80528e-178	8
Gsr	3.79345	95.4	43.2	1.66851e-121	8
Cd9	3.64838	98.6	56.8	1.18752e-100	8
Pglyrp1	3.62987	77.2	12.1	1.74217e-217	8
Rdh12	3.61209	56.2	3.5	0	8
Entpd1	3.57637	93.6	64.4	2.59254e-98	8
Sell	3.54443	75.1	10.2	2.38332e-254	8
Ankrd33b	3.51696	74.7	21.6	1.57581e-121	8
Srgn	3.4399	100	96.5	1.78192e-112	8
Slc2a3	3.40606	64.4	9.7	2.24222e-196	8
Slc16a3	3.34344	95	49.6	1.92285e-103	8
Trem1	3.27478	75.8	9.3	1.35853e-285	8
Hp	3.27312	76.9	17.4	3.96366e-144	8
Rnf149	3.24435	98.6	77.4	5.11797e-99	8
Il1b	3.03931	98.6	56.1	3.9175e-78	8
Ccr1	3.00768	92.9	54.4	1.9258e-70	8
Sh2d3c	3.00188	58.4	5	1.13136e-291	8
Itgal	2.9675	85.4	30.3	6.44786e-109	8
Mcemp1	2.95616	77.6	19.1	2.66188e-149	8
Hcar2	2.94719	59.4	16.6	3.76567e-87	8
Arg2	2.88726	69	10.9	5.31905e-198	8
Asprv1	2.84615	31	0.5	0	8
Slc40a1	2.77832	53.4	12	1.68116e-97	8
Selenon	2.77115	72.6	23.4	2.00388e-105	8
Fam107b	2.7561	81.1	44.6	8.44633e-66	8
Gcnt2	2.74781	77.9	20.8	4.08927e-133	8
Nudt4	2.74542	71.5	33.5	1.82076e-62	8
Mmp9	2.65188	81.1	28.5	6.26221e-89	8
Tpd52	2.64989	98.2	86.8	1.21158e-86	8
Dgat1	2.60879	56.9	20.8	9.28923e-60	8
Taldo1	2.57785	96.4	81.9	1.59243e-71	8
Stk17b	2.568	95	76.6	3.68437e-74	8
Il1f9	2.51422	45.2	0.5	0	8
Lyst	2.50746	68.3	29.5	3.10281e-61	8
Txn1	2.48423	97.2	88.5	2.00874e-60	8
H2-Q10	2.47318	59.4	7.6	1.60264e-210	8
Cd300ld	2.42951	92.5	61.7	8.94293e-69	8
4833407H14Rik	2.40405	54.1	7	6.87064e-182	8
Clec4e	2.39866	91.5	47.8	6.42656e-63	8
44627	2.3919	85.1	61.8	1.731e-48	8
Stx11	2.38727	75.1	42.6	9.44586e-49	8
Raf1	2.38481	81.1	49.9	2.70768e-51	8
Antxr2	2.38092	76.2	50.6	6.22576e-36	8
Cdk2ap2	2.36339	85.8	67.6	2.99006e-45	8
Lrg1	2.33498	39.5	1.5	0	8
Lst1	2.33106	94.3	70	2.00478e-60	8
Fbxl5	2.32438	73.3	43.1	1.75085e-46	8
2810474O19Rik	2.31564	79	54.4	5.85629e-38	8
Vasp	2.31462	87.5	59.6	6.17958e-62	8
Adam8	2.30253	87.5	48.1	2.42226e-56	8
Cd44	2.2963	99.6	88.8	1.07451e-69	8
Btg1	2.28386	98.9	94.2	1.40758e-64	8
Trem3	2.27276	58.7	9.1	3.33641e-163	8
AC110211.1	2.24766	45.6	0.6	0	8
2310001H17Rik	2.23884	64.1	23	6.11518e-73	8
Hectd1	2.21508	89.3	66.3	3.30944e-54	8
Il1rap	2.20767	54.8	16	3.25674e-75	8
A530064D06Rik	2.17766	55.9	13.8	7.31153e-94	8
Tyrobp	2.17547	99.6	99.1	3.25387e-70	8
Samsn1	2.16695	85.8	57.6	2.03468e-43	8
Prdx5	2.159	92.2	81.1	1.2363e-42	8
Snx20	2.1447	77.6	50.4	3.00628e-39	8
Ncf2	2.14431	95.4	86.3	1.56155e-68	8
Tgm2	2.1374	65.8	25.2	1.30598e-60	8
Ets2	2.1161	90	70.1	2.26497e-39	8
Klf3	2.11515	87.5	63.1	3.85574e-47	8
Abr	2.09474	70.8	37.7	2.49894e-46	8
Fgl2	2.07929	70.1	37.9	8.67112e-38	8
Cyp4f18	2.06733	82.9	58.1	3.51724e-36	8
Thbs1	2.05363	72.6	32.5	9.01588e-43	8
Gadd45a	2.05225	49.1	19.3	3.69257e-39	8
Adipor1	2.03778	87.5	61.7	9.98862e-56	8
Mmp8	2.03287	33.5	5.5	2.43351e-81	8
Fpr2	2.02928	53.7	7.4	6.70296e-167	8
Braf	2.02529	72.2	38.2	6.28582e-48	8
Ptprc	2.00859	99.3	95.3	2.92457e-73	8
Fmnl1	2.00846	81.9	58.2	1.45731e-36	8
Cd24a	2.00191	64.1	24.6	4.50618e-53	8
Gngt2	1.99428	63.3	36.6	8.11274e-25	8
Tmcc1	1.99261	87.2	73.7	2.62214e-33	8
Neat1	1.99075	99.6	96.1	9.01272e-44	8
Isg20	1.98711	40.6	8.8	1.79421e-73	8
Sema4d	1.97498	67.3	31.2	6.62573e-49	8
Tpm4	1.97418	91.5	76.1	3.56767e-43	8
Snx18	1.95606	86.1	58.9	9.89636e-46	8
Cdkn1b	1.95342	71.9	41.8	1.5823e-39	8
Osgin1	1.95012	51.2	14.2	1.93407e-69	8
Rac2	1.94983	89.3	72.8	6.83841e-34	8
Dhrs9	1.94101	42.7	4.3	7.22076e-178	8
F630028O10Rik	1.94034	53	24	1.46971e-34	8
Rnf11	1.9399	70.1	37.5	6.515e-47	8
Slfn4	1.93646	35.2	2.1	5.73964e-221	8
Fxyd5	1.92815	99.3	93.6	2.02369e-44	8
Tnfaip2	1.9249	77.9	47.4	6.15586e-39	8
Pbx1	1.92332	52.3	21.1	5.49503e-42	8
Cpne2	1.92163	48	21.8	7.07112e-31	8
Gm26740	1.92125	58	20.7	4.39779e-57	8
D8Ertd738e	1.91885	91.5	81.9	4.15079e-22	8
Map1lc3b	1.91876	92.5	88	5.18152e-27	8
Ndel1	1.91743	92.9	81.9	2.53415e-46	8
Cebpb	1.91171	100	97.6	5.31389e-60	8
Plk3	1.90566	68.7	33.5	1.78095e-46	8
Sp140	1.89994	64.4	43.8	4.29959e-21	8
Mrgpra2b	1.89488	26.3	0.3	0	8
Glrx	1.89422	58.7	33.7	3.68828e-25	8
Cd300lf	1.8897	54.4	8.1	1.38959e-156	8
Jaml	1.88756	40.2	7.3	1.9369e-90	8
Emilin2	1.88051	93.2	75.7	7.95445e-49	8
Prr13	1.87557	88.3	79	3.2519e-31	8
Cxcr4	1.87435	96.1	85.9	2.01222e-39	8
Dusp16	1.86918	65.5	44.4	2.92626e-20	8
Plac8	1.86648	57.3	28.2	2.72377e-23	8
Il15	1.86555	53	20.4	1.06468e-46	8
Smox	1.85222	70.5	45.7	1.41943e-26	8
Mrpl33	1.85116	93.2	84.2	3.97929e-37	8
Tbc1d23	1.85051	69	41.8	9.90092e-34	8
Ppp2r5a	1.8498	81.5	69.6	6.02502e-28	8
Lcp1	1.84956	98.2	96.8	5.2492e-53	8
Cd300lb	1.84819	77.2	48.9	2.52992e-35	8
Txnip	1.84781	90.4	67.9	3.25728e-26	8
Dusp6	1.84382	64.1	32.8	5.47686e-34	8
Dennd4a	1.8406	88.6	69.6	3.15623e-25	8
Adgre5	1.83719	86.8	78.7	1.21163e-27	8
Ptgs2os2	1.82859	31	2.6	3.33303e-147	8
Ace	1.82803	47.7	14.6	1.48676e-48	8
Trim30b	1.81384	37.4	6.9	1.15046e-80	8
Pag1	1.81006	57.3	23.8	4.10709e-43	8
Gdap10	1.80925	58.4	39.3	4.65216e-14	8
Retreg1	1.8083	67.6	38.1	8.9952e-33	8
Ifitm2	1.80636	99.3	98.3	1.26082e-42	8
Gpsm3	1.80621	80.1	58.5	1.87759e-27	8
Ptgs2	1.80352	58.4	24.8	2.13848e-35	8
Snap23	1.80094	82.2	69.4	1.83066e-23	8
Rhog	1.79774	81.5	67.9	3.03902e-27	8
Igf1r	1.79318	60.9	36	6.0286e-23	8
9830107B12Rik	1.78716	37.7	2	2.86411e-261	8
Klhl2	1.78219	56.6	24	1.15103e-43	8
Nfe2	1.77895	42	5.3	8.35987e-137	8
Emd	1.77885	68	48.5	4.78062e-18	8
Xylt1	1.77661	67.3	38.5	1.11613e-31	8
Cfap43	1.7761	57.3	21.5	1.2159e-53	8
Fgr	1.77292	62.3	32.9	2.61763e-33	8
Zfp36l2	1.77292	95.4	89.7	1.03189e-27	8
Cdc42ep3	1.77096	51.2	20.6	3.55322e-38	8
Gmfg	1.77088	95.7	89.3	2.08671e-31	8
Mirt1	1.7691	38.1	2.9	7.23788e-199	8
Trib1	1.76905	82.6	62	5.414e-24	8
Ago2	1.76657	85.4	68.9	2.71183e-25	8
Vps37b	1.75818	86.5	72.2	7.01689e-18	8
Apbb1ip	1.75814	79	65	1.02092e-21	8
Prdx6	1.74937	74	57.5	3.86893e-22	8
Plek	1.74672	98.2	93.9	3.99315e-32	8
Ell2	1.74109	65.5	46	5.95459e-17	8
Pou2f2	1.74033	68.3	56	8.91791e-13	8
Spn	1.73324	45.2	18.1	1.48927e-31	8
Cd274	1.73236	55.9	28.9	1.22618e-24	8
Sirpb1b	1.72981	44.1	15.3	1.38805e-38	8
Actg1	1.72581	99.6	99.7	1.03793e-48	8
Selplg	1.72541	85.1	72.7	1.29142e-16	8
Dusp5	1.72244	77.2	51.9	1.89178e-25	8
Rgs2	1.72212	79.7	57.7	1.95703e-22	8
Dgat2	1.71988	41.6	8.7	5.02242e-77	8
Sik1	1.71718	60.9	39.1	1.07036e-19	8
Gk	1.71706	58	29.1	1.22954e-30	8
Ogt	1.71623	76.2	56.7	1.01394e-22	8
Cmip	1.71618	67.6	45.5	3.97155e-23	8
Ralgapa1	1.714	45.2	22.8	6.3297e-21	8
Tnrc6b	1.70815	64.1	44.8	1.87376e-15	8
Kpna4	1.70667	87.9	78.1	5.94823e-23	8
Cytip	1.70129	85.4	59.7	2.79514e-24	8
Pygl	1.69661	47.7	17.2	4.71926e-43	8
Rasa2	1.69338	44.8	26.9	1.23955e-12	8
Myh9	1.68514	88.6	78.5	3.07043e-22	8
Sephs2	1.68263	52.3	24.1	8.56489e-31	8
Msn	1.68157	96.4	90.8	7.88915e-42	8
Rasgrp2	1.67753	58	29.2	3.19231e-30	8
R3hdm4	1.67601	55.9	40.7	1.26011e-10	8
Actn1	1.67402	40.2	8.3	1.46448e-75	8
Btg2	1.67319	90.4	73.3	9.60289e-24	8
Ankrd44	1.67047	74.4	61.9	1.01032e-17	8
Anxa11	1.66133	73.7	54.9	3.46015e-18	8
Clec4n	1.66118	50.5	30	5.95223e-13	8
Cyth1	1.65892	83.6	67.7	3.00623e-26	8
Zyx	1.65475	85.4	71.7	2.3707e-18	8
Cd300a	1.65213	85.1	72.1	6.50089e-23	8
Tnfrsf1a	1.6508	84	74.8	4.98687e-21	8
Nedd9	1.64529	59.1	28.9	1.41934e-33	8
Ppp1r2	1.64427	84.7	73.5	1.71048e-27	8
Gpat3	1.64197	28.8	3.1	1.09169e-106	8
Ddx6	1.63974	91.8	86.9	4.9847e-16	8
Arrdc3	1.63763	62.6	35.8	2.91148e-22	8
Limd2	1.63722	58.4	29.8	1.96794e-29	8
Pilra	1.63569	65.5	42.2	2.67209e-18	8
Lrrfip1	1.63488	81.9	65.4	8.33997e-19	8
Cyfip2	1.63315	42.7	12.8	1.27088e-47	8
Samhd1	1.6301	86.1	80.9	1.93066e-20	8
Ceacam1	1.62957	47	24.9	3.7406e-19	8
Sntb2	1.62628	50.2	35.1	1.81988e-07	8
Treml4	1.61786	44.1	13.3	4.95189e-45	8
Itgb2	1.61399	86.1	79.8	1.0614e-17	8
Mpzl3	1.6118	28.1	2.1	6.85525e-146	8
Hcst	1.61154	69.4	49.3	3.96635e-19	8
Rnf144a	1.61116	34.2	4.6	7.81508e-102	8
Ccnd3	1.60871	54.1	38.1	3.66801e-11	8
Gpcpd1	1.60147	74	56.6	4.70107e-15	8
Tspan13	1.60105	65.8	39.8	1.94525e-22	8
Fpr1	1.6001	28.8	1.6	1.6103e-188	8
Pla2g7	1.59968	82.9	68	1.38793e-22	8
Glipr2	1.59949	44.8	21.6	1.24454e-22	8
Slc22a15	1.59885	35.6	8.3	1.04028e-55	8
Hdac4	1.59465	39.9	25.1	2.35258e-08	8
Coro1a	1.59319	95.4	91.8	1.20047e-29	8
Atf7ip	1.59293	67.3	51	2.22612e-12	8
Pnrc1	1.59184	94.7	87.6	1.82432e-25	8
Neurl3	1.59127	72.2	57.4	2.42485e-11	8
Mbp	1.58951	65.8	42.1	1.27562e-23	8
Etnk1	1.58726	61.6	45.4	2.08601e-12	8
N4bp1	1.58405	58.4	42.5	7.9565e-09	8
Dusp1	1.58073	98.6	93.5	7.42494e-21	8
Chp1	1.57912	64.4	43.7	5.12056e-18	8
Suco	1.57697	50.9	35.3	2.28597e-08	8
Ssh2	1.57688	75.8	60.5	3.52497e-19	8
B430306N03Rik	1.57654	39.9	9.1	7.39336e-65	8
Notch2	1.57498	81.5	74.5	6.60776e-11	8
Smchd1	1.57219	69.8	57.8	9.03477e-12	8
Spi1	1.57051	93.6	91.2	1.3494e-22	8
Tmem38b	1.57035	56.9	24.4	6.72386e-37	8
Clk1	1.56851	87.5	79.7	5.60965e-22	8
Mxi1	1.5679	63.7	40.3	1.58244e-19	8
Srpk2	1.56459	51.6	36.3	1.8471e-08	8
Ezr	1.56242	79.7	59.8	2.14629e-18	8
Nfam1	1.56182	76.5	62.9	2.28337e-13	8
Pgd	1.56072	79	69.4	5.35703e-12	8
Ripor2	1.55845	38.1	13.2	4.49184e-33	8
C3	1.55578	49.8	21.5	2.32726e-28	8
Gm26532	1.5526	42.3	19.6	2.75399e-21	8
Vmp1	1.55192	72.2	68.7	2.67002e-05	8
Ubap1	1.54719	56.9	38.9	3.277e-12	8
Cdk17	1.5469	55.5	32.7	8.76686e-19	8
Alas1	1.54301	55.5	37.5	1.42871e-12	8
Sesn2	1.54101	40.2	12.9	4.86899e-41	8
Pkm	1.54055	94.3	87.5	1.46283e-23	8
Adgre4	1.53967	47.7	23.8	9.10075e-21	8
Rab7	1.53799	86.1	84.6	3.44091e-08	8
Tnfrsf1b	1.53752	89.7	77.4	6.25953e-22	8
Hist1h2bc	1.53734	47	31.8	6.62481e-07	8
Ptp4a1	1.53674	88.3	82.7	1.07311e-17	8
Pbxip1	1.53522	50.2	34.6	1.37328e-09	8
Dedd2	1.53241	47	22.6	9.10419e-24	8
Sirpb1c	1.53096	58.7	29.5	5.13988e-24	8
Fam111a	1.52943	74.7	62.3	7.13151e-11	8
S100a6	1.52588	99.6	95.8	1.78847e-11	8
F5	1.52553	31.3	7	1.76409e-50	8
Slc11a1	1.52487	76.2	68.3	2.4617e-09	8
Gfod1	1.52344	44.5	17.2	1.21165e-33	8
AB124611	1.52287	69	50.3	1.17771e-15	8
Cd52	1.52223	99.3	85	2.6539e-21	8
Map2k4	1.52138	41.6	25.2	3.22203e-10	8
Rsrp1	1.52027	94.3	86.9	1.18932e-23	8
Ypel3	1.51889	66.5	45.7	3.87687e-16	8
Lasp1	1.51818	71.5	64.6	8.85269e-07	8
Jdp2	1.51808	79.7	61.8	2.1762e-11	8
Ltb	1.51803	28.1	3.1	8.64345e-101	8
Iqsec1	1.51757	46.3	21.4	1.19114e-24	8
Smim3	1.51584	44.8	27.2	3.90512e-10	8
Litaf	1.5128	96.1	93.7	9.16462e-19	8
Eif1	1.51251	99.6	99.8	6.64927e-40	8
Cd82	1.51205	53.7	31.6	2.57338e-17	8
Dgkh	1.51132	42.3	20.6	2.20049e-18	8
Stk11	1.50965	60.1	43.6	6.02975e-10	8
Fam32a	1.50781	62.3	43.7	5.85005e-16	8
Tes	1.50682	52.3	37.9	8.25957e-09	8
Gda	1.50473	86.8	75.1	8.50503e-16	8
Myl12b	1.50385	86.5	81.4	1.70728e-16	8
Fgd3	1.50369	34.9	13.6	4.12138e-23	8
Rara	1.50346	66.5	47.9	4.17345e-16	8
Bcl6	1.50216	68	50.9	3.50514e-15	8
Fyb	1.50119	80.8	73.9	1.31118e-14	8
Igfbp4	0.666485	35.9	57.6	1.5745e-07	8
Adam15	0.666328	39.1	67.8	7.45547e-20	8
Il7r	0.66583	9.6	29.9	1.46734e-09	8
Rps2	0.664859	87.9	98.9	1.60723e-26	8
Cd163	0.664706	33.8	52.7	1.74023e-05	8
Maf	0.664457	44.1	69.4	7.31592e-09	8
Odc1	0.664388	24.9	42.9	1.02955e-05	8
Ly86	0.66365	67.3	90.3	4.54251e-22	8
Rpl36a	0.663612	82.2	97.5	1.21327e-28	8
Eif1a	0.662741	54.4	79.7	5.46515e-21	8
Hspd1	0.661983	55.9	73.5	8.54948e-06	8
Nme1	0.660667	54.1	80.7	7.67783e-22	8
Fcgrt	0.660517	45.2	66.6	2.72338e-09	8
Sdc3	0.660487	45.2	73.4	7.35183e-21	8
Ctsb	0.659665	89	99.7	3.45189e-13	8
Rpl3	0.659494	82.6	99	2.79175e-31	8
Lgmn	0.659037	78.6	95.6	1.19194e-13	8
Hexa	0.658894	74	91.5	3.18084e-21	8
Naaa	0.658596	46.3	69.7	3.28698e-15	8
Cfh	0.657368	48.4	63.9	6.50563e-06	8
Fgfr1	0.657084	26.7	55.1	3.12996e-16	8
Fcgr2b	0.655474	56.9	83.3	3.13391e-22	8
Qpct	0.65517	20.3	46.5	3.05153e-16	8
Dok2	0.653136	25.6	58	2.00793e-22	8
Rps26	0.651496	87.9	99.7	1.13218e-36	8
Atpif1	0.650449	64.4	86.1	5.04828e-25	8
Rplp1	0.64859	92.2	99.9	6.6872e-60	8
Dhrs3	0.648513	34.2	70	7.36214e-26	8
Ccr5	0.647475	39.9	62.4	3.40479e-11	8
mt-Nd2	0.646789	84.3	99.7	4.77559e-29	8
Mtss1	0.646261	38.4	66.9	7.74069e-15	8
Nrp2	0.64451	32.4	65	1.04262e-19	8
44815	0.642891	35.2	65.3	3.58899e-23	8
Rpl14	0.642666	81.5	98.2	1.16093e-35	8
Hspa1b	0.64155	68.3	83.2	0.000115109	8
Igf1	0.639263	27	51.4	1.17062e-11	8
Slamf7	0.63726	30.6	61.1	2.08463e-18	8
Npm1	0.636954	73.7	95.7	6.99606e-32	8
Tspan3	0.636611	21.7	54.6	4.58005e-22	8
Ctsc	0.636041	74	95.8	4.844e-24	8
Atp5g1	0.635436	49.8	76.2	1.7839e-25	8
Pepd	0.63502	45.2	75.3	2.29561e-23	8
Rbpj	0.633682	64.8	88	1.5484e-22	8
Mafb	0.632114	63.3	85.5	1.07412e-16	8
Rpl12	0.631979	81.1	98.1	1.04792e-33	8
Atf3	0.631935	75.4	88.9	2.40139e-10	8
Npc2	0.631894	78.6	98.3	1.40893e-35	8
Tppp3	0.627203	40.9	60.4	2.06339e-09	8
Ctsl	0.627042	56.9	76.7	1.38426e-11	8
Rab7b	0.624464	43.1	74.3	1.1231e-22	8
Tubb5	0.622459	60.5	83.5	7.03467e-20	8
Akr1a1	0.62165	71.9	92.8	3.0125e-28	8
Tnfsf9	0.620188	31.3	50.8	1.63635e-07	8
Tuba1b	0.618722	53.7	80.2	7.23902e-22	8
Hspe1	0.617873	68	88.2	4.01658e-14	8
Eps8	0.617858	54.4	83.3	5.04966e-23	8
Serpinb6a	0.615842	36.7	61.2	8.15829e-14	8
Timp2	0.614726	60.1	82.2	2.8708e-14	8
Cd83	0.613944	69.8	88.3	2.78481e-16	8
Ppia	0.611629	87.2	99.6	4.15353e-49	8
Gas6	0.610251	33.8	57.4	6.30496e-10	8
Gas2l3	0.608532	35.2	68.1	4.81121e-23	8
Ltc4s	0.607086	31.7	49.5	4.53787e-07	8
Dbi	0.606358	66.9	90.8	1.04691e-30	8
Gdf15	0.606053	37.4	49.7	0.008038	8
Ednrb	0.605831	28.1	48.4	2.03756e-07	8
Trem2	0.604001	38.8	55.5	2.50172e-07	8
Cbr2	0.603642	34.9	54.5	2.07575e-08	8
Tnf	0.601089	46.6	63.2	2.78937e-05	8
Grn	0.5987	73.7	93.8	2.30885e-25	8
Ccr2	0.595558	38.1	66	1.5388e-15	8
Ms4a7	0.588797	34.2	56.5	2.09198e-10	8
Gas7	0.588282	38.4	73.1	1.48586e-30	8
Raph1	0.587557	37	68	3.39401e-23	8
Dab2	0.587067	41.3	77	3.40952e-20	8
Rps27l	0.586848	65.1	87.7	4.56901e-27	8
Rgs10	0.586534	51.6	81.1	8.61433e-28	8
Cxcl16	0.583141	39.9	68.4	2.16823e-18	8
Mrc1	0.583067	45.2	82.4	4.29442e-22	8
C3ar1	0.582022	39.9	74	2.80898e-22	8
Etv3	0.577447	56.9	80.4	7.70642e-21	8
Fcna	0.575515	22.1	39.1	1.16246e-05	8
Clec4b1	0.573571	25.3	53.9	1.83302e-20	8
Ckb	0.573426	39.1	72.2	9.02964e-28	8
Hspa1a	0.571234	67.3	83.3	3.99691e-07	8
Cd209a	0.56163	22.4	43.2	3.11956e-08	8
Folr2	0.560879	33.5	54.3	1.7265e-08	8
Cfp	0.552156	54.1	77.4	2.34087e-24	8
Clic4	0.55015	54.1	83.8	6.40331e-29	8
Ccl7	0.549503	28.8	55.5	2.74462e-11	8
Pmp22	0.54585	37	71.4	1.59632e-22	8
Ccl2	0.545256	41.6	73.4	4.00015e-21	8
Lyve1	0.545176	29.5	47.2	9.61174e-07	8
Cd81	0.542516	48.8	79.6	3.7545e-28	8
Mt2	0.533577	20.6	43.8	1.05775e-10	8
Selenop	0.533025	68	90	1.64401e-17	8
S100a4	0.532097	72.6	92.8	2.23479e-27	8
Vim	0.529954	86.5	96.3	1.87327e-29	8
Mmp19	0.529665	21	37.7	2.873e-06	8
Mgl2	0.528814	34.5	68.4	3.99584e-23	8
Tnip3	0.525651	38.4	56.7	2.84342e-10	8
Ccl24	0.519253	32	58.2	5.09547e-14	8
Tmem176b	0.516392	54.4	88.3	3.22221e-39	8
Sdc4	0.514734	34.9	68.9	2.25916e-20	8
F13a1	0.513766	48.8	80.7	6.00647e-23	8
Tmem176a	0.513018	49.5	84.5	6.22534e-40	8
Fxyd2	0.511155	29.5	56.2	1.52509e-14	8
Anxa5	0.510894	71.5	96.5	2.54141e-53	8
Rgl1	0.500691	36.7	72.5	6.38952e-28	8
Emp1	0.498143	35.2	72	7.00633e-29	8
Ahnak	0.497319	69.4	95.6	1.35223e-45	8
Capg	0.477726	46.3	80	3.68269e-38	8
H2-DMb1	0.476655	44.1	75.9	7.07239e-35	8
Ecm1	0.473697	37	71.2	2.09691e-29	8
Fcrls	0.466297	31.7	64.5	7.51866e-27	8
Ccl9	0.465704	65.1	90.7	2.24122e-43	8
H2-DMa	0.464981	52.7	83.5	4.76912e-40	8
C1qc	0.455984	42	76.8	1.21162e-27	8
Lpl	0.455101	32	59.6	1.07448e-18	8
Pltp	0.451565	58.4	87	7.37338e-40	8
Pf4	0.450074	45.2	74.4	5.08404e-20	8
Lmna	0.441316	35.9	78.5	8.67984e-43	8
C1qa	0.432057	42	76.8	7.13494e-29	8
Cxcl10	0.404193	22.8	43.2	1.00526e-07	8
Mt1	0.401587	50.9	86.7	2.62193e-38	8
Cd74	0.39826	82.9	95.3	2.92468e-39	8
H2-Aa	0.397125	60.9	87.4	4.4438e-39	8
Fn1	0.392114	35.9	52.3	5.75784e-08	8
H2-Ab1	0.388909	62.6	88.2	2.68792e-39	8
C1qb	0.388606	44.1	80	5.24678e-36	8
Lgals1	0.387785	52.3	88.2	5.0985e-48	8
H2-Eb1	0.376913	60.1	85.5	3.87563e-37	8
Crip1	0.37057	79.7	98.4	2.14689e-57	8
S100a10	0.354386	55.5	91.4	5.84508e-56	8
Retnla	0.265157	41.3	67.5	4.26071e-21	8
Lyz1	0.255731	25.3	47.1	1.13328e-10	8
FC>1.5; pct1 or pct2>0.25; padj<0.05
FC: Cl8 vs. rest of 10 clusters combined
pct.1: Percent of positive cells in Cl8
pct.2: Percent of positive cells in rest of 10 clusters combined

[truncated: 2 more sheets: Cl9, Cl10]
