# Supplementary material for: Single-cell analysis of skeletal muscle macrophages reveals age-associated functional subpopulations
Source: eLife. 2022 Oct 19;11:e77974. doi: 10.7554/eLife.77974 (PMC9629833; doi:10.7554/eLife.77974)
Supplement: Supplementary file 2. [file elife-77974-supp2.xlsx]

## Sheet: LYVE1+ macs
Table S2. Genes highly expressed in LYVE1+ or LYVE1- macrophages
Genes	FC_LYVE1+/LYVE1-	%_LYVE1+	%_LYVE1-	p_val_adj
Lyve1	8.33491	100	0	0
Folr2	6.18429	96.1	16.5	0
Pf4	5.05226	99.6	50.9	0
Ccl8	4.9219	51.9	6.7	0
Selenop	4.80998	99.8	80.2	0
Cd209f	4.35613	62	5.2	0
F13a1	4.20113	99.3	62.7	0
Gas6	4.13409	96.4	22	0
Fxyd2	3.95406	91.7	23.8	0
Cfh	3.94322	93.9	36.9	0
Maf	3.88319	97.9	43	0
C4b	3.82105	77.9	9.8	0
Cbr2	3.78822	94.6	18.5	0
Fcna	3.74445	74.1	7.5	0
Jun	3.64138	93.1	57.7	0
Cd163	3.62694	84.6	23.7	0
Ednrb	3.58954	81.1	18.7	0
Ccl24	3.52577	92.4	26.9	0
Ltc4s	3.46728	87.4	15.5	0
Igfbp4	3.46104	94.6	24.1	0
Mrc1	3.36084	99.5	65.4	0
Dab2	3.21495	98.9	55.9	0
Clec10a	3.19774	84.1	36	0
Fcgrt	3.17659	94.7	40.8	0
Cd209d	3.16035	68	16.3	0
Hspa1b	3.02914	97.2	70	0
Timp2	2.98039	98.9	66.4	0
Hspa1a	2.94028	97.4	70	0
Wwp1	2.93082	91.8	27.9	0
Rnase4	2.87358	92.3	29.4	0
Ccl7	2.7616	77.2	35.1	0
Stab1	2.71734	89.9	27.4	0
C1qc	2.70654	99.5	55.1	0
Serpinb6a	2.6006	91.1	33.8	0
Mtss1	2.58577	93.1	42.5	0
C1qa	2.55353	99.5	55.1	0
Cd209g	2.53299	55.3	3.5	0
Tns1	2.51913	85.1	23.3	0
Serinc3	2.49728	99.9	95.4	0
Egr1	2.48509	79	30.1	0
Glul	2.43141	95.1	53.8	0
Txnip	2.38327	89.1	50.7	0
Mafb	2.37532	98.2	73.2	0
Hsph1	2.34531	78.3	48.8	0
Snx2	2.33638	92	52.7	0
Igf1	2.27104	84.1	21.4	0
Hspb1	2.27023	35	9.5	7.54147e-197
Pmp22	2.26185	96	48.1	0
Rgl1	2.19039	92.6	53	0
Zfp36l1	2.18022	95.9	60	0
Rhob	2.14751	89.2	52.2	0
Ehd4	2.12071	95.2	63.4	0
Jund	2.11497	99.7	96.4	0
Cd36	2.10986	98.4	69.9	0
Trf	2.10514	96.4	66.8	0
Klf2	2.09596	88.2	58.7	0
Tcf4	2.07802	92.7	56.5	0
Sulf2	2.04538	82.6	33	0
Hsp90aa1	2.01324	98.6	97.2	0
Emp1	2.00732	90.9	53.5	0
Stard8	1.99379	75.7	19.3	0
Frmd4b	1.99222	82.8	26.4	0
P2rx7	1.98802	70	20.9	0
Tgfbr2	1.98246	88.3	42.6	0
Ctsc	1.9729	99.5	91.4	0
Grn	1.97179	99.3	87.8	0
Klf4	1.96606	91.2	62.5	0
Itm2b	1.93476	99.9	99.2	0
Tgfbi	1.93178	99.5	87.9	0
Fgfr1	1.92924	80.6	31.2	0
Lrp6	1.91001	75.4	22.3	0
Gm42418	1.90682	99.9	99.9	1.41097e-273
Mmp9	1.90557	52.4	10.5	0
Ighm	1.89516	87.2	42.1	0
Mef2c	1.89344	93.5	58.4	0
Timd4	1.8925	54.3	3.3	0
Junb	1.88554	98.7	95.5	0
C3ar1	1.87713	95.6	53.2	0
Ccl2	1.86877	89	58	1.09096e-289
Zfp36	1.86522	97.8	93.8	0
Nrp1	1.86434	84.8	40	0
Itsn1	1.86007	75.8	21.1	0
Tfrc	1.85705	68.8	17.6	0
Cebpd	1.85665	81.2	43.7	0
Mylip	1.8494	75.6	35.8	0
Mat2a	1.84577	93.7	78.3	0
Pepd	1.83653	91.3	59.5	0
Csf1r	1.83527	99.1	90.7	0
Blvrb	1.83489	91.3	62.7	0
Cd209b	1.82012	35.4	2.8	0
Psd3	1.81851	80.5	27.4	0
Lifr	1.81048	80.9	34.9	0
Gpr34	1.80406	67.8	14.9	0
Aplp2	1.80215	95.3	73.6	0
Eps15	1.7987	81	39	0
Cmah	1.78255	61.2	7.7	0
Hspd1	1.77764	84.3	63.1	1.02209e-227
Ifi207	1.77556	95.7	77.8	0
Rin2	1.77526	69	21.5	0
C1qb	1.77399	99.4	61	0
Kitl	1.75937	70.6	21.6	0
Slco2b1	1.75357	70	14.8	0
Rab11fip5	1.75339	73.3	20.5	0
Man1a	1.75151	90.3	58.9	0
Cd33	1.74746	81.3	30.3	0
Rcn3	1.74136	51.8	4.9	0
Pla2g2d	1.72818	44.6	5.1	0
Mfsd11	1.72745	76	32.2	0
Gdf15	1.72584	66.9	34	2.38595e-215
Abca9	1.71859	77.4	32	0
Fcgr2b	1.70557	95.3	71.4	0
Pros1	1.703	77.9	37.1	0
Pltp	1.70261	98.7	75.2	0
Etv1	1.6973	57.6	6.3	0
Dse	1.69641	81.4	39.5	0
Colec12	1.69116	41	2	0
Siglech	1.68815	50.4	3.8	0
Atf3	1.68728	95.1	82.8	2.86523e-245
Hpgds	1.68422	70.4	21.5	0
Selenbp1	1.67757	60.3	11.3	0
Zfhx3	1.67714	86.6	49.5	0
Serpinb8	1.67569	79.4	38.2	0
Hpgd	1.67214	83.4	39	0
Cd63	1.67102	97.1	52.6	0
Cltc	1.66812	98.7	90.8	0
Tsc22d3	1.66521	84	50.8	0
C5ar1	1.6588	94.6	62.1	0
Gatm	1.65857	74	29.3	0
Cd164	1.65769	82.4	44.6	0
Cd81	1.649	97.8	62	0
Zfand5	1.64758	97.3	89.7	0
Bag3	1.64603	74.4	50.1	1.34313e-184
Klf6	1.6436	99.1	96.6	7.84803e-293
Bmp2	1.64077	45.8	5.6	0
Ap1b1	1.63942	76.2	32.4	0
Nrp2	1.6348	82.1	48.3	7.49608e-301
Mgl2	1.63382	89.2	48.2	0
Pfkfb3	1.63132	61.7	28.1	5.30899e-250
Vsig4	1.62965	28	0.7	0
Abca1	1.62873	87.3	47	0
Lgmn	1.62785	99.7	91.1	0
Slc9a9	1.62694	67.2	20.6	0
Pea15a	1.61743	84.7	49	0
Sema4a	1.61675	76.9	38.6	0
Zbtb20	1.6132	80.2	47.7	8.15059e-290
Cd38	1.60892	48	5.7	0
Snx5	1.60679	94.8	72.9	0
Qk	1.60533	95.7	80.4	0
Ier5	1.60484	96.9	89.7	1.88129e-268
Sgpp1	1.60316	69	27.2	0
B4galt6	1.60104	75	32.8	0
Gas7	1.59451	89	57.3	0
Tcn2	1.59271	76.9	37.8	0
Ang	1.58952	59.8	14.1	0
Gpr183	1.58839	62.9	21.5	0
Ap2a2	1.5853	88.1	61.8	0
Chp2	1.57854	49.8	2.9	0
Reps2	1.57532	54.8	8.2	0
Fchsd2	1.57343	58.4	16.6	0
Mt2	1.56766	59.8	28.6	7.9869e-178
Ddx60	1.56733	47.4	7.5	0
Apoe	1.56699	97.4	79.5	1.0871e-293
Ctnnd1	1.56659	66.8	23.2	0
Rab3il1	1.56425	77.4	35.1	0
Idh2	1.56039	68.4	25.9	0
Tmem106a	1.55855	79.2	43.6	0
Ppp1r15a	1.55624	93.1	79.8	4.96181e-248
Cp	1.55509	44.2	3.5	0
Hbegf	1.55148	45.7	13.8	1.73348e-248
Ifi203	1.54731	81.8	44.4	0
Myo5a	1.54481	81	47.1	0
Pdxk	1.54304	74.3	49.8	7.75639e-162
Rgs10	1.54301	92.3	69.6	8.28293e-281
Dnajb1	1.5428	77.5	54.5	8.06917e-179
Rnf150	1.54241	68.1	26	0
Rasgrp3	1.53627	51.2	6.2	0
Cited2	1.53538	74.5	43.4	2.46608e-220
Tceal9	1.53422	75.5	40.7	4.4691e-273
Alox5	1.53367	64.4	20.9	0
Dhrs3	1.53353	88.5	51.8	0
Plekhg5	1.53303	49.8	4.4	0
Tanc2	1.52713	59	13.4	0
Eid1	1.52381	83.8	52.7	0
Rnasel	1.52345	75.8	42.1	1.20873e-252
Fosb	1.52332	78.1	48.1	5.15491e-216
Rapgef6	1.52305	70.4	41.4	2.59217e-188
Kctd12	1.51891	96.5	82.3	3.04008e-270
Mfsd1	1.51843	87.4	60.9	1.48081e-283
Nr3c1	1.51421	80.6	47.2	7.76038e-292
Camk1	1.51283	74.6	36.4	0
Marcksl1	1.51238	93.3	68.4	7.04832e-272
Enpep	1.51106	37.3	0.9	0
P2ry12	1.51083	53.4	8.6	0
Mt1	1.50536	97.6	75.1	1.29319e-170
Zcchc24	1.5042	59.5	18.3	0
Ccdc152	1.5037	40.1	8.4	4.66005e-286
Wfdc17	1.50308	96.6	82.6	3.67066e-179
Spred1	1.5006	80.5	45.9	5.11721e-282
Sbf2	1.50032	67.3	25.6	0
				Positive %>25; FC>1.5; p<0.01

## Sheet: LYVE1- macs
Genes highly expressed in Lyve1- macrophages
Genes	FC_LYVE1-/LYVE1+	%_LYVE1-	%_LYVE1+	p_val_adj
Fabp5	3.36912	43	28.7	3.01748e-74
Gngt2	3.26876	50.4	22.5	1.5354e-243
Plac8	3.22394	36	21.1	7.31095e-85
Tmsb10	3.06161	93.8	78.6	0
Thbs1	2.92038	39.6	27	2.26679e-56
Cd52	2.91714	97	72.2	0
Lgals3	2.84217	95.7	88.9	0
Il1b	2.58176	67.4	45.8	5.2355e-150
Clec4e	2.48663	60.4	36.1	1.25859e-186
Slc7a11	2.4784	61.1	37.2	1.63372e-176
Msrb1	2.45847	64.1	51.4	2.54702e-136
Bcl2a1b	2.37395	75.2	56.5	1.93261e-205
Napsa	2.37385	67.2	33.7	0
Itgal	2.36192	40	22.7	3.68852e-108
Cytip	2.35905	73.1	45.9	2.74842e-272
Fabp4	2.30229	30.6	19	1.01711e-54
Cd9	2.27686	65.5	49.5	1.93553e-151
Slc16a3	2.26525	62.6	37.5	1.30131e-216
Bcl2a1d	2.24389	67.7	41.7	1.25985e-233
S100a11	2.22497	87.9	76.6	0
Gsr	2.17899	51.2	37.5	1.89073e-97
Plaur	2.17303	83.8	61.6	0
Srgn	2.16465	98.2	94.8	0
Stap1	2.10856	68	50.8	2.36387e-189
Fn1	2.07636	61.7	40.5	1.43077e-117
Ear2	2.02945	48.3	28.5	5.97135e-123
Btg1	2.02812	96.9	91.5	0
Prdx5	2.0113	85.4	76.8	4.2009e-201
Rplp0	1.99118	98.9	98.6	0
Taldo1	1.96868	87	76.9	1.22841e-273
Fxyd5	1.92896	96.7	90.3	0
Gm2a	1.88029	89.3	77.9	0
Samsn1	1.87943	67.8	47.8	2.70769e-193
Gapdh	1.87859	96.6	92.3	0
Clec4d	1.87449	54.3	38.8	4.85843e-102
Tnip3	1.858	65.1	45.9	1.65034e-114
Lsp1	1.81598	90.9	76.1	0
Cd300c2	1.81145	70.7	59.2	3.5813e-153
Hp	1.8062	26.5	10.9	2.71056e-93
Mpeg1	1.80031	90.2	72.2	5.26007e-270
Cd14	1.78862	89.8	94.6	6.35246e-79
Esd	1.78777	77.6	68.6	2.35262e-166
Pgam1	1.7792	77.8	67.5	1.02364e-187
Pkm	1.77909	91	83.9	0
Smpdl3a	1.77688	70.8	65.7	4.05973e-90
Atox1	1.76355	95	89.5	0
Cyba	1.76237	98.6	97.5	0
Cd44	1.75758	94.2	83.3	5.65134e-270
Dusp5	1.75476	60.4	43.8	2.10929e-111
Tyrobp	1.74279	99.3	99	0
Itgb2	1.70998	84.8	74.6	3.45595e-219
Plbd1	1.70766	77.8	54.6	1.15331e-251
Rnh1	1.70145	80.2	71.9	1.64802e-163
Prdx6	1.69963	63.8	51.3	9.49476e-113
Coro1a	1.69883	93.9	89.6	1.04511e-241
Lrrfip1	1.6953	74.4	56	5.8716e-205
Agpat4	1.67393	61.9	38.6	5.00956e-209
Sirpb1c	1.66972	41.2	18	3.36383e-169
Rilpl2	1.66911	81.5	66.1	2.59829e-180
Rps7	1.66569	98.6	98.7	0
Rps19	1.66224	98.8	99.4	0
Eno1	1.65947	80.3	66.1	6.8301e-250
Tgm2	1.65735	34.9	16.6	4.58196e-116
Cks2	1.65183	56.5	48.3	9.73253e-64
Rpl32	1.65048	98.4	98.9	0
Rpl18	1.64314	98.7	98.6	0
Basp1	1.64056	62.9	58.8	1.8283e-41
Traf1	1.63217	55.5	38.5	4.23217e-113
Txn1	1.63207	90.1	87.1	3.66599e-167
Rnf149	1.6308	81.3	74.2	9.73054e-112
Prdx1	1.62551	95.6	97.6	2.03047e-31
Rpl15	1.62012	97.8	97.3	0
Adam8	1.61925	58.4	38.9	5.14584e-124
Mmp19	1.60003	37.4	37	0.00759587
Rps27a	1.59737	99.8	99.9	0
Il1rn	1.59657	49	41.4	7.25407e-21
F10	1.59558	35	17.6	1.16454e-94
H2-Eb1	1.5946	82.2	87.8	3.50187e-66
Ifitm6	1.59133	58.6	55.3	2.36291e-53
Rpsa	1.58473	99	99.7	0
Rpl13	1.5794	99.2	99.8	0
Arl5c	1.57768	50.3	35.9	5.18356e-78
Tmsb4x	1.57704	100	100	0
Rpl21	1.57452	98.4	98.8	0
H2-DMb1	1.57341	75.4	74.4	4.17378e-86
H2-Ab1	1.56805	85.3	89.9	9.53971e-73
Lst1	1.56801	66.6	75.5	1.40778e-08
Rps3	1.56729	98.4	98.1	0
Fau	1.56299	99.9	99.9	0
Emb	1.55814	74.4	59.6	2.84137e-137
Rps18	1.55754	98.2	98.9	0
Ppp2r5a	1.55463	71.7	68	5.29288e-47
Arpc1b	1.55191	97.5	96.1	0
Rps15a	1.55094	98.8	99.3	0
Rpl19	1.54917	99	99.7	0
Cd74	1.54402	95.7	94.1	6.94361e-89
Rps16	1.53785	99.4	99.5	0
Ms4a4c	1.53591	31.3	20.4	6.04207e-49
Malt1	1.53313	58.8	45	1.57228e-76
Aldoa	1.53203	86.2	81	1.33667e-174
H3f3a	1.53102	99.6	99.7	0
Raf1	1.52592	53	48.3	9.10298e-37
Rpl28	1.52567	98.8	99.2	0
Bcl2a1a	1.52504	34.8	20.8	1.06049e-67
Ramp1	1.52358	56.5	32	2.08773e-201
Cyp4f18	1.52004	63.6	53.3	1.22181e-86
Anxa2	1.51587	87.5	87.9	8.56459e-87
Rps13	1.51571	99.1	99.5	0
Cd300a	1.51287	76	68.4	2.16464e-112
Rps11	1.51258	99.2	99.6	0
Rpl11	1.50888	98.5	98.8	0
Adgre4	1.50679	28.9	19.5	1.05409e-40
Sorl1	1.50219	34.2	17.8	1.58652e-93
Ltb4r1	1.50108	44.5	24.6	1.18209e-134
Rpl18a	1.50067	99.1	99.2	0
Csf2rb	1.50054	63.8	54.8	6.92619e-56
					Positive %>25; FC>1.5; p<0.01
