# Supplementary material for: Single-cell analysis of skeletal muscle macrophages reveals age-associated functional subpopulations
Source: eLife. 2022 Oct 19;11:e77974. doi: 10.7554/eLife.77974 (PMC9629833; doi:10.7554/eLife.77974)
Supplement: Supplementary file 3. [file elife-77974-supp3.xlsx]

## Sheet: LYVE1+MHCIIlo_markers
Table S3. Featured genes in 4 subgroups
Genes	FC (LpHl/rest subgroups)	% of + in LpHl	% of + in rest subgroups	p_val_adj	cluster
Lyve1	3.80537	100	40.5	0	1LpHl
Folr2	2.86411	96.2	48.4	1.72751e-275	1LpHl
Pf4	2.86056	99.7	70.2	4.8851e-282	1LpHl
Fxyd2	2.73321	90.3	51.1	4.46169e-193	1LpHl
Aqp1	2.68318	40	10.3	2.53674e-159	1LpHl
Cfh	2.67812	95.6	59.4	1.39735e-264	1LpHl
Ltc4s	2.55836	88.3	44.4	1.03997e-231	1LpHl
F13a1	2.55776	98.9	77.5	1.56246e-261	1LpHl
Cbr2	2.54116	94.3	49.1	1.44925e-257	1LpHl
Gas6	2.49481	96.3	52	5.08898e-264	1LpHl
Selenop	2.48961	99.6	87.9	6.54222e-234	1LpHl
Rnase4	2.44795	93.7	54.1	1.31131e-246	1LpHl
Fcgrt	2.43919	95.1	62.3	5.49998e-242	1LpHl
C1qc	2.40421	99.5	72.9	1.66813e-270	1LpHl
Stab1	2.34617	90.8	52.3	2.8141e-209	1LpHl
Ednrb	2.31308	72.6	44.6	8.37675e-95	1LpHl
Serpinb6a	2.28389	92.2	56.4	1.3582e-217	1LpHl
Dab2	2.25463	98.2	73.1	1.60705e-215	1LpHl
Timp2	2.25402	98.7	79.5	3.2655e-244	1LpHl
C1qa	2.25088	99.1	72.9	2.46419e-234	1LpHl
Fcna	2.22734	70.1	34.6	2.48485e-130	1LpHl
Tns1	2.22375	85.9	47.6	8.83251e-207	1LpHl
Maf	2.22149	96.3	65	2.33836e-185	1LpHl
Emp1	2.16464	92.4	68.2	7.38122e-140	1LpHl
C4b	2.15479	68.4	38	2.00297e-95	1LpHl
Snx2	2.0715	92.4	68	3.19971e-185	1LpHl
Ccl24	2.05833	86.7	53.9	8.89527e-125	1LpHl
Colec12	2.05147	52.4	16.4	5.76109e-180	1LpHl
Cd163	2.03857	73.5	49.3	9.34906e-89	1LpHl
Wwp1	2.03185	89	53.5	6.97738e-172	1LpHl
Vsig4	2.0306	33.7	11.1	6.56971e-92	1LpHl
Hspa1a	2.02764	95	80.8	1.96555e-83	1LpHl
Mrc1	2.01335	99.5	79	2.29557e-178	1LpHl
Jun	2.01143	88.6	72	3.5794e-76	1LpHl
Gpr34	1.98843	71.2	35.7	5.36638e-153	1LpHl
Txnip	1.96814	87	66	1.25601e-105	1LpHl
Sulf2	1.93804	82.9	52.3	7.8335e-162	1LpHl
Igfbp4	1.92525	92.3	52.5	3.61455e-152	1LpHl
Timd4	1.91016	59.3	23.1	5.71012e-157	1LpHl
Serinc3	1.90003	99.9	97.2	8.64864e-214	1LpHl
Pepd	1.88665	91.4	71.9	5.70177e-154	1LpHl
Hspa1b	1.88162	93.4	80.9	2.02535e-63	1LpHl
Hspb1	1.8719	28	20.4	2.96754e-06	1LpHl
C1qb	1.86559	99.4	76.4	3.20384e-150	1LpHl
Csf1r	1.86554	99	93.9	2.12479e-202	1LpHl
Blvrb	1.84721	92	74	3.6068e-145	1LpHl
Mtss1	1.84555	90.5	62.9	4.38619e-137	1LpHl
Cd63	1.81308	97.8	70.1	1.8152e-151	1LpHl
Ehd4	1.79616	94.4	75.9	1.09672e-146	1LpHl
Stard8	1.79301	71.9	41.8	1.50567e-125	1LpHl
Tcf4	1.77917	91	70.7	9.7947e-130	1LpHl
Tppp3	1.77906	72.9	57.8	4.04223e-49	1LpHl
Glul	1.77655	94.2	70	9.8754e-132	1LpHl
Pmp22	1.77524	95.1	67.2	1.1237e-112	1LpHl
Rgs10	1.77403	93.1	78.5	8.31406e-132	1LpHl
P2rx7	1.76661	64.9	40.8	4.82442e-73	1LpHl
Ighm	1.74864	78.3	60.8	5.79472e-57	1LpHl
Gpr183	1.74728	60.7	37.9	4.47934e-63	1LpHl
Ecm1	1.74699	90.5	67.8	2.19311e-94	1LpHl
Frmd4b	1.7316	78.1	48.9	4.25421e-110	1LpHl
Tgfbr2	1.72937	85.9	60.7	2.47128e-124	1LpHl
Tgfbi	1.72488	99.4	92.5	5.62243e-156	1LpHl
Itm2b	1.72014	100	99.5	4.22683e-179	1LpHl
Hpgd	1.70168	83.7	56.6	2.96765e-99	1LpHl
Igf1	1.69449	78.6	47.3	3.29709e-95	1LpHl
Selenbp1	1.69113	62.1	30.7	1.83911e-125	1LpHl
Mef2c	1.68185	90.8	72.3	5.0842e-105	1LpHl
Grn	1.67746	99.1	92.3	3.58648e-136	1LpHl
Fgfr1	1.67453	74.9	51.5	3.45518e-83	1LpHl
Hpgds	1.67083	69.1	41	1.78058e-88	1LpHl
Alox5	1.66161	65.3	37.6	8.43874e-104	1LpHl
Gatm	1.65701	72.6	47.2	7.20584e-86	1LpHl
Rin2	1.65556	62.7	40.8	1.09944e-69	1LpHl
Cebpd	1.64672	76.6	59.2	2.11193e-57	1LpHl
Cd33	1.64612	79.8	50.7	6.37188e-109	1LpHl
Ctsc	1.64457	99.5	94.5	3.56668e-115	1LpHl
Gdf15	1.63165	55.7	48	6.04808e-06	1LpHl
Itsn1	1.62906	69.7	43.1	8.53346e-94	1LpHl
Rab11fip5	1.62701	69.3	41.5	1.42245e-104	1LpHl
C3ar1	1.62357	94.6	70.2	9.52799e-94	1LpHl
Lgals1	1.62308	97.1	85.8	1.36681e-105	1LpHl
Cd209f	1.62209	40.1	30.6	1.39038e-10	1LpHl	PNAS
Psd3	1.61759	71.8	49.1	1.82981e-81	1LpHl
Camk1	1.61689	73.3	51.2	1.90315e-93	1LpHl
Lrp6	1.61614	69.3	43.9	3.0948e-89	1LpHl
Bin1	1.60782	73.2	53.8	1.96679e-84	1LpHl
Mfsd11	1.60478	71	49.8	1.53215e-75	1LpHl
Rgl1	1.6029	87.4	69	4.0657e-46	1LpHl
Cmah	1.59941	56.9	29.1	5.74397e-91	1LpHl
Cd36	1.59867	96.9	81	2.58424e-79	1LpHl
Ang	1.59564	59.5	32.3	2.54978e-90	1LpHl
Rcn3	1.59493	44.9	23.9	5.48641e-58	1LpHl
Ifi27l2a	1.58726	93.6	89.5	6.01863e-29	1LpHl
Cd209d	1.58664	41.8	39.8	0.0986005	1LpHl
Rhob	1.5822	82.7	67	1.04908e-52	1LpHl
Tcn2	1.57966	72.4	52.8	2.74049e-80	1LpHl
Etv1	1.57476	52.9	26.9	3.3907e-82	1LpHl
Ccdc152	1.57099	40.5	20.6	5.14691e-54	1LpHl
Hsph1	1.56925	64.7	61.7	2.97799e-06	1LpHl
Eps15	1.56749	74.9	56.1	2.49255e-73	1LpHl
Fchsd2	1.5659	54.6	33.4	2.76694e-58	1LpHl
Mafb	1.56574	97.4	83.2	1.18894e-70	1LpHl
Idh2	1.5645	65.4	42.8	2.23134e-78	1LpHl
S1pr1	1.56378	50.3	23.5	6.57492e-93	1LpHl
Nrp1	1.54834	78.2	58.2	4.56257e-73	1LpHl
Zfp36l1	1.54662	92.2	74.5	9.27584e-74	1LpHl
C5ar1	1.54632	91.6	75	4.13342e-68	1LpHl
Rab3il1	1.54614	72.9	51.8	1.51922e-75	1LpHl
Slco2b1	1.54351	64.9	37.3	2.1192e-83	1LpHl
Ccl8	1.54294	35.1	26.6	5.70598e-05	1LpHl
Smagp	1.54172	58.4	32.2	4.75419e-87	1LpHl
Klf4	1.54142	85.6	74.5	8.5748e-41	1LpHl
Man1a	1.53498	86.9	71.2	2.69541e-71	1LpHl
Nfic	1.53398	63	42.3	1.63882e-66	1LpHl
P2ry12	1.52904	55	26	3.71675e-102	1LpHl
Gas7	1.52519	84.9	69.9	3.25919e-75	1LpHl
Slc29a1	1.51931	60.8	39.8	1.20328e-68	1LpHl
Ccl7	1.51895	65.1	52.9	2.6887e-12	1LpHl
Trf	1.5182	93.3	78.7	1.41846e-71	1LpHl
Ifi207	1.51445	92.3	85.1	5.8229e-47	1LpHl
Cd81	1.51077	97	76.4	9.51165e-79	1LpHl
Zfand5	1.50996	95.8	92.8	1.70369e-57	1LpHl
Malat1	1.5085	99.9	99.8	7.85763e-71	1LpHl
Klf2	1.50446	81.1	71	1.73134e-25	1LpHl
Atf3	1.50044	91.1	87.9	4.19454e-20	1LpHl
Ace	0.665313	4.4	16.5	2.76069e-18	1LpHl
Pgk1	0.664042	42.8	69.1	1.42025e-54	1LpHl
Rpl18	0.662169	97.9	98.7	7.62328e-97	1LpHl
Rpl13	0.656505	99.6	99.5	4.59602e-126	1LpHl
Cks2	0.656494	31.4	54.4	1.54784e-33	1LpHl
Odc1	0.653252	21.3	44.2	9.92268e-32	1LpHl
Slamf8	0.651737	11.6	46.6	1.71252e-82	1LpHl
Nfil3	0.650661	22.4	57	2.66694e-72	1LpHl
Fam46c	0.650163	10.6	38.1	1.22998e-55	1LpHl
Srxn1	0.650097	25.9	52.5	2.07019e-46	1LpHl
Runx3	0.649631	9.2	42.9	2.09894e-79	1LpHl
Nfkb1	0.648631	77.2	88.7	1.99045e-53	1LpHl
Rnh1	0.648278	61	77.9	7.02033e-39	1LpHl
Esd	0.647506	57.2	75	3.10332e-36	1LpHl
Got1	0.645991	46.3	68.9	2.97904e-48	1LpHl
Atox1	0.645046	84.1	93.2	9.59436e-71	1LpHl
Rps7	0.642096	98.4	98.7	4.93498e-106	1LpHl
Ccr5	0.6417	42.4	63.5	6.67881e-37	1LpHl
Vps37b	0.641375	46.4	75	1.03929e-59	1LpHl
Lrrfip1	0.639778	39.3	68.6	1.31976e-58	1LpHl
Slc15a3	0.638369	40.2	71.1	3.40653e-68	1LpHl
Psap	0.63823	99.9	99.6	6.35518e-79	1LpHl
Pde4b	0.637015	27.8	61.2	8.59859e-74	1LpHl
Taldo1	0.635268	65.7	83.7	2.5859e-40	1LpHl
Pim1	0.634491	69.1	91.9	1.32893e-77	1LpHl
Actg1	0.632533	99.7	99.7	1.23991e-83	1LpHl
Ptprc	0.632328	87.6	96.1	4.93725e-84	1LpHl
Gfpt1	0.632191	19.7	49.3	3.18052e-57	1LpHl
Cyp4f18	0.631031	26.8	62	1.41167e-71	1LpHl
Cd9	0.630645	36.5	60	1.64327e-30	1LpHl
Ltb4r1	0.629022	3.9	38.5	5.60373e-90	1LpHl
Ramp1	0.626801	9	49.2	2.91258e-107	1LpHl
F10	0.626688	5.9	29	2.24132e-46	1LpHl
Cd209a	0.625848	30.3	43.4	1.41695e-11	1LpHl
Chil3	0.625525	5.5	16.8	6.21476e-15	1LpHl
Prdx5	0.624494	66.2	83.1	5.78794e-35	1LpHl
Agpat4	0.62307	16.4	54.3	8.15503e-89	1LpHl
Fabp4	0.621302	9	26.5	2.99123e-27	1LpHl
Ifit1	0.621071	14.5	26.7	5.80832e-12	1LpHl
Bcl2a1a	0.61978	3.3	30.9	7.74084e-64	1LpHl
Ahr	0.617491	34	63.7	3.11786e-65	1LpHl
Clec4d	0.615588	21.2	49.7	2.2847e-49	1LpHl
Rps27a	0.615312	99.8	99.9	2.30839e-168	1LpHl
Pkm	0.612836	72.4	89	1.50197e-73	1LpHl
Ifitm6	0.612361	30.9	59.8	1.32166e-55	1LpHl
Retnla	0.611422	63.7	65.9	9.5816e-06	1LpHl
Coro1a	0.608905	78.1	93.3	4.20693e-81	1LpHl
Alcam	0.600101	24.1	64.2	2.32777e-100	1LpHl
Il6	0.594876	5.4	22	2.55553e-28	1LpHl
Txnrd1	0.585905	55.3	79.6	4.68144e-78	1LpHl
Tnfrsf1b	0.584926	53.1	79.8	2.15529e-73	1LpHl
Gsr	0.584267	26.2	46.4	4.5376e-28	1LpHl
Pgam1	0.584172	50.3	75.1	9.72265e-64	1LpHl
Bhlhe40	0.583491	11.6	47.7	1.33255e-86	1LpHl
Rpsa	0.57937	99.2	99.4	1.54589e-174	1LpHl
Flrt3	0.578	2.3	26.2	3.42471e-54	1LpHl
Il7r	0.576995	2.1	32.3	6.51406e-76	1LpHl
Slpi	0.575337	7	17.4	1.51246e-11	1LpHl
Cxcl2	0.575202	64.8	74	1.91754e-16	1LpHl
Rel	0.572552	68.6	85.9	2.95842e-72	1LpHl
Ezr	0.57143	28.1	63.5	7.85352e-89	1LpHl
Isg15	0.56148	26.6	47.5	2.01898e-28	1LpHl
Nlrp3	0.549774	23.3	54.3	9.20677e-61	1LpHl
Arl5c	0.549665	9.4	46.9	2.77333e-95	1LpHl
Rnf149	0.549537	55.6	80.3	8.5368e-77	1LpHl
S100a11	0.546915	68.1	83.9	3.7559e-55	1LpHl
Rplp0	0.541343	97.8	98.9	1.05167e-145	1LpHl
Itgal	0.539724	9.1	33.8	8.50522e-47	1LpHl
Ptgs2	0.537383	7.7	27.5	3.06571e-35	1LpHl
Sowahc	0.536057	15	57.9	9.00376e-120	1LpHl
Slc38a1	0.535426	29.6	71.5	4.73366e-118	1LpHl
Msrb1	0.532543	34.7	60.5	1.29706e-42	1LpHl
Traf1	0.531007	10.6	51.3	2.74144e-109	1LpHl
Cd44	0.527343	72.8	90.7	4.83928e-108	1LpHl
Basp1	0.519501	33.9	63.8	3.14023e-66	1LpHl
Cd14	0.515496	89.1	92.2	8.9823e-68	1LpHl
Rab11fip1	0.502787	7.1	52.1	2.0518e-132	1LpHl
Ccrl2	0.502368	33.7	60.5	3.67615e-51	1LpHl
Emb	0.490608	20.5	72	3.57715e-160	1LpHl
Samsn1	0.485261	20.7	62	1.77029e-115	1LpHl
Slc16a3	0.480537	16.5	54.3	7.11197e-91	1LpHl
Gpr132	0.478613	18	69.3	3.50656e-166	1LpHl
Lsp1	0.477184	55.9	86.8	4.99812e-139	1LpHl
Malt1	0.471961	16	56.2	8.14313e-113	1LpHl
Clec4b1	0.471017	13.9	57.4	2.82827e-130	1LpHl
Mmp19	0.470723	17.5	39	2.55416e-36	1LpHl
Adam8	0.468173	9.9	53.3	6.2243e-127	1LpHl
Stap1	0.464471	21.3	63.8	7.24504e-115	1LpHl
Dusp5	0.463365	14.4	56.4	1.78878e-114	1LpHl
Csf2rb	0.463046	26.9	62.8	5.63369e-101	1LpHl
Nr4a3	0.457904	22	54.9	5.04058e-80	1LpHl
Plaur	0.456726	42.5	76.6	1.11553e-114	1LpHl
Srgn	0.445191	89.3	97.4	5.61408e-159	1LpHl
Rilpl2	0.443062	37.6	78	1.38497e-149	1LpHl
Napsa	0.442946	9.1	56.4	2.75233e-137	1LpHl
Ccl5	0.429184	2.4	17.7	4.82125e-29	1LpHl
Gngt2	0.419762	11.4	40.3	9.25833e-61	1LpHl
Plbd1	0.416183	14	72.5	3.53169e-216	1LpHl
Gm2a	0.415391	56.9	86.3	3.59315e-167	1LpHl
S100a8	0.39543	5.8	10.1	0.683418	1LpHl
Plac8	0.389275	11.2	30.9	4.02729e-32	1LpHl
Mpeg1	0.387751	36	86.6	2.29101e-216	1LpHl
Lpl	0.384013	33	61.3	6.93399e-72	1LpHl
Ear2	0.373147	4.2	43.1	1.65196e-107	1LpHl
S100a9	0.369789	6	11	0.0720715	1LpHl
Btg1	0.360968	79.5	95.8	1.05429e-191	1LpHl
Bcl2a1b	0.358071	28.4	70.7	1.21276e-129	1LpHl
Clec4e	0.349091	13.6	52.8	4.63535e-101	1LpHl
Il1rn	0.348314	12.6	48.7	2.20727e-90	1LpHl
Ccr2	0.342977	12.9	71.2	7.5981e-197	1LpHl
Thbs1	0.335903	12.5	35.6	2.89708e-41	1LpHl
Bcl2a1d	0.335366	9.3	60.4	1.02727e-166	1LpHl
Spp1	0.321191	4.4	19.4	7.76554e-25	1LpHl
Slc7a11	0.317696	9.8	54.5	1.4149e-125	1LpHl
Cytip	0.314624	12.5	65.6	1.14621e-170	1LpHl
Lgals3	0.31411	79	94	7.99492e-163	1LpHl
H2-DMa	0.313692	42.9	87	1.35302e-258	1LpHl
H2-DMb1	0.307147	28.8	79.9	2.75346e-245	1LpHl
Fabp5	0.306128	11	39.2	5.65701e-57	1LpHl
Tmsb10	0.294721	59	89.4	1.53152e-193	1LpHl
Tnip3	0.288489	8.3	61.6	1.03349e-174	1LpHl
Il1b	0.208608	17.1	61.6	1.17817e-131	1LpHl
Cd52	0.205841	39.2	90.8	7.39526e-297	1LpHl
Fn1	0.171483	11.3	56.3	3.16179e-136	1LpHl
Lyz1	0.149454	21.4	48.6	1.10209e-62	1LpHl
Cd74	0.0763717	71.2	97.3	0	1LpHl
H2-Aa	0.06188	49.9	90.5	0	1LpHl
H2-Eb1	0.0495067	44	88.9	0	1LpHl
H2-Ab1	0.0494025	51.9	91.1	0	1LpHl
					FoldChange>1.5; positive % in the subgroup>25

## Sheet: LYVE1+MHCIIhi_markers
Featured genes in LYVE1+/MHCIIhi subgroup
Genes	FC (LpHh/rest subgroups)	% of + in LpHh	% of + in rest subgroups	p_val_adj	cluster
Ccl8	3.4345	56.1	11	0	2LpHh
Cd209f	3.06537	67.9	10.7	0	2LpHh
Folr2	2.62488	95.7	28.8	0	2LpHh
Clec10a	2.57198	89.6	39.9	0	2LpHh
Selenop	2.49583	99.8	82.8	0	2LpHh
Cd209d	2.42857	74.8	20.1	0	2LpHh
Lyve1	2.42252	100	15.7	0	2LpHh
Jun	2.37517	94.3	61.9	0	2LpHh
Pf4	2.34495	99.6	58	0	2LpHh
C4b	2.33716	80	18.7	0	2LpHh
Cd163	2.33668	87.1	31.4	0	2LpHh
Maf	2.33664	98.1	50.9	0	2LpHh
Igfbp4	2.323	95	34.4	0	2LpHh
Ccl24	2.27069	93.6	36.4	0	2LpHh
Fcna	2.25185	74.5	17.3	0	2LpHh
Gas6	2.2485	96.3	33.6	0	2LpHh
Ccl7	2.24506	79.9	39.4	0	2LpHh
F13a1	2.24143	99.3	68.4	0	2LpHh
Mrc1	2.22476	99.4	70.5	0	2LpHh
Cd209g	2.14626	60.4	8.2	0	2LpHh
Hspa1b	2.14468	98	73.1	0	2LpHh
Ednrb	2.14103	82.8	27.1	0	2LpHh
Egr1	2.08622	82.5	35.1	0	2LpHh
Cbr2	2.08155	94.2	30.3	0	2LpHh
Cfh	2.07305	93.2	45.7	0	2LpHh
Fxyd2	2.05541	91.5	34.1	0	2LpHh
Hspa1a	2.01107	97.9	73.2	0	2LpHh
Dab2	2.00174	98.9	62.3	0	2LpHh
Wwp1	1.99843	92.1	36.9	0	2LpHh
Ltc4s	1.96818	87	26.9	0	2LpHh
Mafb	1.92135	98.3	76.8	0	2LpHh
Mmp9	1.91479	60	12.2	0	2LpHh
Hsph1	1.91013	81.4	50.8	6.11085e-264	2LpHh
Mtss1	1.90225	93.5	49.7	0	2LpHh
Fcgrt	1.88092	94.5	49	0	2LpHh
Timp2	1.87809	98.8	71.5	0	2LpHh
Jund	1.85748	99.7	96.7	0	2LpHh
Glul	1.83009	95.1	59.4	0	2LpHh
Serinc3	1.81039	99.9	96	0	2LpHh
Zfp36l1	1.79176	96.6	64.6	0	2LpHh
Igf1	1.77557	85.4	30.3	0	2LpHh
Rgl1	1.76189	93.2	58	0	2LpHh
Klf2	1.75182	89.8	61.9	3.46367e-251	2LpHh
Trf	1.74332	96.9	70.6	0	2LpHh
Gm42418	1.74045	99.9	99.9	6.38338e-219	2LpHh
Rhob	1.73308	90.2	56.2	4.89776e-299	2LpHh
Rnase4	1.72829	91.5	39	0	2LpHh
Pmp22	1.70882	95.9	55.1	0	2LpHh
Hsp90aa1	1.70153	99.2	96.9	2.02584e-283	2LpHh
Cd36	1.69615	98.6	73.4	0	2LpHh
Txnip	1.69416	89.3	55.9	1.14636e-302	2LpHh
Mgl2	1.69306	94	51.7	0	2LpHh
Ccl2	1.68724	91.7	60.6	2.48139e-252	2LpHh
Stab1	1.68578	89	37.3	0	2LpHh
Hspb1	1.68223	36.6	12.3	7.02553e-157	2LpHh
C1qc	1.67337	99.5	61.9	1.88445e-283	2LpHh
Serpinb6a	1.6645	90.5	42.5	0	2LpHh
C1qa	1.65914	99.6	61.7	3.0933e-263	2LpHh
Junb	1.65443	99.1	95.5	2.50872e-263	2LpHh
Tns1	1.65282	84.1	32.7	0	2LpHh
Pla2g2d	1.6395	49.4	8.1	0	2LpHh
Hspd1	1.63675	87.1	63.9	1.1301e-201	2LpHh
Cd209b	1.63074	39.3	5.5	0	2LpHh
Klf4	1.62586	92.5	65.9	1.52223e-242	2LpHh
Tfrc	1.62282	71.1	23	0	2LpHh
Snx2	1.61868	91.3	58.4	0	2LpHh
Ehd4	1.6108	95.1	67.8	0	2LpHh
Zfp36	1.60183	98.3	93.9	5.21349e-228	2LpHh
Tcf4	1.5982	92.6	61.3	0	2LpHh
Mat2a	1.58968	94.7	79.5	4.49496e-234	2LpHh
Ctsc	1.58564	99.5	92.4	0	2LpHh
Mylip	1.57046	77.7	39.8	5.85808e-269	2LpHh
Lifr	1.5579	82.9	40	0	2LpHh
Lrp6	1.55327	76.3	29.4	0	2LpHh
Tgfbr2	1.55046	88.5	48.7	0	2LpHh
Frmd4b	1.54873	82.8	34.1	0	2LpHh
Nrp1	1.5475	86.2	45.4	0	2LpHh
Grn	1.54622	99.2	89.4	0	2LpHh
Klf6	1.54478	99.2	96.9	6.99532e-244	2LpHh
Fgfr1	1.54155	81.5	37.9	0	2LpHh
Kitl	1.53282	72.9	27.1	0	2LpHh
Aplp2	1.53138	96.2	76	3.9197e-299	2LpHh
Marcksl1	1.53044	95.6	70.6	2.72494e-263	2LpHh
P2rx7	1.53044	70.6	27.5	0	2LpHh
Stard8	1.52087	75.6	27.2	0	2LpHh
Cd38	1.51768	51.8	9.6	0	2LpHh
Itm2b	1.51762	99.9	99.3	0	2LpHh
C3ar1	1.51688	95.5	59.5	4.94145e-247	2LpHh
Pltp	1.51575	99	78.4	1.00205e-229	2LpHh
Fcgr2b	1.51377	96.7	73.9	2.19209e-288	2LpHh
Tgfbi	1.51267	99.4	89.6	0	2LpHh
Mef2c	1.50603	93.7	62.9	1.09192e-285	2LpHh
Itsn1	1.50214	76.2	28.3	0	2LpHh
Hbegf	1.50097	50.6	15.6	3.16863e-260	2LpHh
Cd44	0.666969	85.8	90.6	6.7273e-102	2LpHh
Rpl32	0.666404	99.1	98.5	2.09907e-276	2LpHh
Rpl15	0.660473	97.7	97.6	4.89687e-276	2LpHh
Prdx1	0.659967	97.8	95.5	1.0253e-12	2LpHh
Coro1a	0.659699	92.5	91.4	2.28733e-104	2LpHh
Lrrfip1	0.658562	60.8	68.5	1.01761e-88	2LpHh
Tgm2	0.657316	18.5	29.9	2.97073e-48	2LpHh
Lsp1	0.657146	81	85.3	2.78486e-120	2LpHh
Rps19	0.656392	99.5	98.8	3.34234e-298	2LpHh
Sirpb1c	0.654505	20.7	35.3	2.92289e-72	2LpHh
Gm2a	0.654259	82.4	83.9	2.88621e-93	2LpHh
S100a4	0.653244	93	91.4	1.23563e-116	2LpHh
Cd14	0.653063	95.9	89.6	1.58458e-14	2LpHh
Rnh1	0.646078	74.6	77.1	1.02371e-81	2LpHh
Txn1	0.640955	88.3	88.8	1.17755e-113	2LpHh
Samsn1	0.637982	54.7	59.7	1.07975e-49	2LpHh
Itgb2	0.636734	77.2	80.6	1.25504e-116	2LpHh
Prdx6	0.63212	55.2	59.2	6.38355e-50	2LpHh
Pgam1	0.631946	71.6	73.2	1.61457e-80	2LpHh
Eno1	0.631216	67.4	76.2	3.37769e-165	2LpHh
Pkm	0.630456	86.5	87.8	7.35839e-155	2LpHh
Atox1	0.629441	90.7	93.2	5.3175e-215	2LpHh
Btg1	0.620636	94.5	94	1.52154e-99	2LpHh
Ear2	0.616514	35.5	41.3	2.81004e-20	2LpHh
Lyz1	0.61651	57	39.5	8.33088e-19	2LpHh
Esd	0.610836	71.4	74.3	1.9383e-86	2LpHh
Smpdl3a	0.608856	69.2	67.6	6.22697e-43	2LpHh
Cyba	0.608525	97.7	98.2	0	2LpHh
Tyrobp	0.60816	99	99.2	4.72966e-256	2LpHh
Clec4d	0.600726	43.8	48.6	2.60488e-29	2LpHh
Cd300c2	0.582184	61.9	66.6	1.62166e-87	2LpHh
Gapdh	0.576857	92.8	95.5	3.0562e-300	2LpHh
Rplp0	0.571522	98.8	98.7	0	2LpHh
Bcl2a1d	0.566158	50.7	58	1.28318e-50	2LpHh
Stap1	0.564464	58.3	60.2	9.23567e-51	2LpHh
Taldo1	0.553366	79.6	83.2	4.51081e-159	2LpHh
Srgn	0.553121	96.3	96.8	1.77382e-190	2LpHh
Fxyd5	0.548262	91.3	95.1	0	2LpHh
Plaur	0.542989	66.5	77	2.30446e-157	2LpHh
Prdx5	0.541553	79.8	82.4	1.00912e-110	2LpHh
Cytip	0.541034	54.9	63.4	4.52771e-72	2LpHh
Bcl2a1b	0.524001	64.3	67.6	9.04803e-52	2LpHh
Il1b	0.523827	53.5	59.3	4.55946e-25	2LpHh
Slc7a11	0.518361	45.2	52.8	1.23544e-38	2LpHh
Slc16a3	0.515901	43.1	54.7	1.06441e-75	2LpHh
S100a11	0.507755	78.5	84.5	8.29786e-177	2LpHh
Gsr	0.503268	40.2	46.9	1.07484e-41	2LpHh
Clec4e	0.501168	42.3	52.6	4.43546e-54	2LpHh
Napsa	0.495912	40.8	57.9	6.651e-143	2LpHh
Itgal	0.480848	25.9	34.4	5.7948e-36	2LpHh
Cd9	0.470485	52.7	60.4	1.03748e-76	2LpHh
Fabp4	0.46343	21.4	26.7	1.47406e-14	2LpHh
Cd52	0.46168	81.4	88	1.50631e-287	2LpHh
Msrb1	0.450676	55.5	59.3	1.22828e-59	2LpHh
Lgals3	0.436467	91.6	93	9.20909e-208	2LpHh
Tmsb10	0.416598	83.3	88.1	2.01331e-229	2LpHh
Thbs1	0.416353	30.5	34.9	3.58482e-11	2LpHh
Fabp5	0.360318	33.6	37.9	2.0561e-14	2LpHh
Plac8	0.35883	23.6	31.9	2.58602e-32	2LpHh
Gngt2	0.345844	25.7	44.1	4.77123e-118	2LpHh
					FoldChange>1.5; positive % in the subgroup>25

## Sheet: LYVE1-MHCIIhi_markers
Featured genes in LYVE1-/MHCIIhi subgroup
Genes	FC (LnHh/rest subgroups)	% of + in LnHh	% of + in rest subgroups	p_val_adj	cluster
Lyz1	3.55145	53.9	40.5	6.91008e-83	3LnHh
H2-Eb1	2.66609	99.4	74.3	0	3LnHh
H2-Ab1	2.61895	100	78.5	0	3LnHh
Fn1	2.49613	67.8	41	1.03822e-188	3LnHh
Cd74	2.4862	99.9	91.1	0	3LnHh
Lgals3	2.3641	96	90.1	0	3LnHh
Fabp5	2.36026	46.6	29.5	2.77314e-82	3LnHh
H2-Aa	2.26414	99.9	77.4	0	3LnHh
H2-DMb1	2.24073	91.2	63.7	0	3LnHh
Tnip3	2.18046	73.5	44.6	3.1771e-240	3LnHh
Lpl	1.9971	64.5	54.4	3.58593e-73	3LnHh
H2-DMa	1.98781	94.8	74.3	0	3LnHh
Cd52	1.98757	97	77.9	0	3LnHh
Mmp19	1.96627	43.8	32.1	2.33559e-49	3LnHh
Il1rn	1.96151	56.5	37.5	2.88454e-98	3LnHh
Bcl2a1b	1.89734	77.3	59.1	1.80135e-146	3LnHh
Clec4b1	1.83185	67	43.6	3.08864e-214	3LnHh
Bcl2a1d	1.79693	69.8	45.6	3.28283e-166	3LnHh
Ccrl2	1.75896	63	54.3	1.53277e-40	3LnHh
Isg15	1.7463	47.5	44	8.17699e-10	3LnHh
Il7r	1.6876	42.3	20.6	3.98863e-137	3LnHh
Ccr2	1.64981	81.2	54.7	1.60204e-172	3LnHh
Csf2rb	1.64713	68.5	52.9	1.40291e-106	3LnHh
Malt1	1.64523	63.9	44.3	8.36286e-121	3LnHh
Cxcl2	1.61185	72.8	73.2	5.34933e-06	3LnHh
Ear2	1.60888	48.4	33.1	8.10603e-63	3LnHh
Anxa2	1.60869	89.7	86	3.48602e-132	3LnHh
Tmsb10	1.60859	94	81.2	2.83927e-223	3LnHh
Basp1	1.59772	68.1	55.9	5.57613e-72	3LnHh
Rilpl2	1.59356	82.5	68.3	5.25511e-149	3LnHh
S100a10	1.58774	91.8	89.2	1.25627e-92	3LnHh
Il1b	1.57099	63.7	52.8	5.94449e-32	3LnHh
Gm2a	1.57097	89.2	79.5	2.3587e-174	3LnHh
Rnh1	1.56605	83.8	71.1	5.99291e-149	3LnHh
Crip1	1.55969	98.9	97.1	4.74647e-100	3LnHh
Cd14	1.55197	94.1	90.4	3.47812e-93	3LnHh
Slfn2	1.54672	92.2	87.6	8.5425e-126	3LnHh
Adam8	1.54387	63.8	38.9	2.55732e-156	3LnHh
Capg	1.53749	84.1	75.8	4.11853e-133	3LnHh
Vim	1.53578	97.3	95.1	3.21478e-131	3LnHh
Arl5c	1.5315	52.4	36.9	2.63644e-72	3LnHh
Plaur	1.52849	82.8	66.8	1.00192e-145	3LnHh
Rplp0	1.52776	99.3	98.4	0	3LnHh
Hilpda	1.52188	50.9	39.1	4.20253e-52	3LnHh
Rgs1	1.51734	46.7	39.2	1.04332e-18	3LnHh
Clec4e	1.51503	55.4	44.4	1.21346e-32	3LnHh
Flrt3	1.51383	31.5	18.6	9.49039e-53	3LnHh
Ccr5	1.5118	67.8	57.1	6.41304e-59	3LnHh
Lsp1	1.5074	90.2	79.4	1.8647e-166	3LnHh
Siglech	0.666518	4.6	38.9	2.60498e-286	3LnHh
Mfsd11	0.662786	35.4	63	3.76584e-194	3LnHh
Selenbp1	0.658676	12.2	48.4	1.13505e-287	3LnHh
Etv1	0.658404	7.4	44.4	0	3LnHh
Rab11fip5	0.657993	23.5	58.3	5.47272e-256	3LnHh
Fam46a	0.657446	49.9	73.1	7.17605e-153	3LnHh
Pla2g2d	0.65622	6	34.6	3.17588e-214	3LnHh
Man1a	0.655477	61.9	80.1	2.5282e-189	3LnHh
Tcn2	0.653057	35.8	67.5	6.96102e-237	3LnHh
Rgl1	0.651237	64.1	75.4	1.4035e-86	3LnHh
Junb	0.650769	95.7	97.5	3.45615e-139	3LnHh
Hpgds	0.650632	22.5	58.1	3.14323e-230	3LnHh
Aplp2	0.649453	77.6	87.2	3.89368e-213	3LnHh
Colec12	0.64851	1.9	32.2	2.40568e-271	3LnHh
Ifi207	0.648332	78.4	90.7	1.84364e-173	3LnHh
Slco2b1	0.647135	16.2	56	2.6038e-289	3LnHh
C5ar1	0.64639	60.3	87.6	2.95515e-214	3LnHh
Nr3c1	0.64587	45.3	73.7	5.60518e-237	3LnHh
Rcn3	0.642389	5.3	40	2.38924e-297	3LnHh
Zfand5	0.640411	90.2	95	1.02102e-212	3LnHh
Emp1	0.635795	61.8	76.5	7.74848e-104	3LnHh
Dse	0.633549	38.4	71.6	1.47197e-260	3LnHh
Zfp36	0.629511	94.1	96.4	1.30062e-153	3LnHh
Cmah	0.628608	7.8	48	0	3LnHh
Ighm	0.628404	43.7	75.2	4.05244e-270	3LnHh
Cd33	0.628294	32.1	68	2.01607e-258	3LnHh
Gdf15	0.627704	35.5	57.7	5.43377e-96	3LnHh
Cd209b	0.625994	3.5	27.4	9.65353e-188	3LnHh
Gpr34	0.625316	16.4	54.6	2.53104e-279	3LnHh
Gm42418	0.62481	100	99.9	2.0684e-153	3LnHh
Hsp90aa1	0.624631	98.1	97.5	4.31322e-128	3LnHh
Rin2	0.623741	21.3	57.6	2.93514e-264	3LnHh
Eps15	0.623467	41.3	69.2	1.19511e-235	3LnHh
Itsn1	0.622768	23.1	61.1	1.06429e-297	3LnHh
Nrp1	0.621846	42.6	72.1	2.56864e-246	3LnHh
Blvrb	0.617876	64.9	83.2	1.29912e-220	3LnHh
Tfrc	0.617695	18.6	55.3	1.564e-279	3LnHh
Ctsc	0.614624	94.8	95.1	1.17109e-251	3LnHh
Grn	0.612462	91.6	93.9	4.48048e-258	3LnHh
Tgfbi	0.612446	92.4	93.7	2.43312e-279	3LnHh
Stk17b	0.606132	61.6	86.3	2.72218e-231	3LnHh
Lrp6	0.605333	24.7	61.2	1.33866e-288	3LnHh
Timd4	0.60463	4.2	41.9	0	3LnHh
Jund	0.598348	97.2	98.2	2.13856e-196	3LnHh
Mat2a	0.596091	79.1	89	5.20639e-217	3LnHh
Rhob	0.595875	56.6	76.6	8.87233e-170	3LnHh
Frmd4b	0.592651	29.9	66.6	1.05578e-277	3LnHh
Trf	0.587341	70.6	86.6	1.87694e-233	3LnHh
P2rx7	0.585733	23.1	56.7	3.45383e-241	3LnHh
Stard8	0.583995	21.1	60.8	0	3LnHh
Mylip	0.577727	34.5	66.5	8.66316e-244	3LnHh
Pmp22	0.573015	56.2	79.3	1.60529e-204	3LnHh
Mef2c	0.572372	59	84.3	0	3LnHh
Itm2b	0.569217	99.4	99.6	0	3LnHh
Sulf2	0.563475	34.5	69.3	0	3LnHh
Cebpd	0.562412	42.7	73.2	4.9161e-246	3LnHh
Tgfbr2	0.559007	42.9	76.8	0	3LnHh
Hspb1	0.557401	10.7	28.2	9.22592e-88	3LnHh
Tcf4	0.552616	59.3	81.7	7.50131e-302	3LnHh
Hsph1	0.552507	52.1	68.7	8.09664e-120	3LnHh
Mmp9	0.552499	10.4	42.6	2.91128e-233	3LnHh
Klf4	0.54968	62.8	84.2	4.49498e-231	3LnHh
Mafb	0.546627	76.9	89.8	1.59938e-225	3LnHh
Csf1r	0.545336	90.3	97.2	0	3LnHh
Ehd4	0.544063	65.7	85.9	0	3LnHh
Hpgd	0.5414	35.8	75.2	0	3LnHh
Klf2	0.537829	58.6	81.1	5.8302e-213	3LnHh
C1qa	0.521794	64.5	83	5.97398e-221	3LnHh
Igf1	0.514789	23.6	68.4	0	3LnHh
Egr1	0.514181	34.4	64.5	9.82058e-206	3LnHh
Snx2	0.504431	55.9	80.2	0	3LnHh
Ccl7	0.501467	40.6	63.3	2.26487e-125	3LnHh
Glul	0.500297	56.5	83.1	0	3LnHh
Cd36	0.493643	69.5	91.4	0	3LnHh
C1qc	0.484245	64.5	83	7.65312e-262	3LnHh
Tns1	0.483999	27.1	67.8	0	3LnHh
Mtss1	0.483595	48.1	77.5	0	3LnHh
Zfp36l1	0.471898	59.1	87.8	0	3LnHh
Cd209g	0.469211	4.1	42.8	0	3LnHh
Ly6e	0.46159	53.8	89.8	0	3LnHh
Hspa1a	0.456407	73.5	88.1	1.31089e-250	3LnHh
Serpinb6a	0.450799	36	76.1	0	3LnHh
Hspa1b	0.44699	73.3	88.1	1.87342e-245	3LnHh
Serinc3	0.446397	95.5	98.8	0	3LnHh
Timp2	0.439209	75.7	85.3	0	3LnHh
Txnip	0.437252	48.4	81.4	0	3LnHh
Stab1	0.437032	29.3	74.2	0	3LnHh
Clec10a	0.432481	44.3	67.3	7.14026e-221	3LnHh
Mrc1	0.429772	79.7	82	0	3LnHh
Dab2	0.427891	67	81.4	0	3LnHh
Wwp1	0.414781	30	75.2	0	3LnHh
Cd209d	0.410183	20.7	53	4.681e-250	3LnHh
Rnase4	0.400121	29.9	77.1	0	3LnHh
Ccl24	0.392253	33.9	72.9	0	3LnHh
Fcgrt	0.378189	42.9	80.8	0	3LnHh
Igfbp4	0.374762	27.1	76.2	0	3LnHh
Cd163	0.366487	29.5	66.7	0	3LnHh
Ednrb	0.36125	21.9	64.5	0	3LnHh
Ltc4s	0.350706	17.7	69.7	0	3LnHh
Jun	0.34664	56.5	85.3	0	3LnHh
Fxyd2	0.333987	28.2	73	0	3LnHh
Maf	0.333969	47.5	82	0	3LnHh
Fcna	0.331963	8.9	57.8	0	3LnHh
Cbr2	0.331757	20.7	75.7	0	3LnHh
F13a1	0.32498	70.2	86	0	3LnHh
C4b	0.324095	11	61.3	0	3LnHh
Gas6	0.306996	25	77.6	0	3LnHh
Cfh	0.303767	36.8	80.6	0	3LnHh
Cd209f	0.29037	6.3	48.5	0	3LnHh
Selenop	0.283565	83.8	92.5	0	3LnHh
Ccl8	0.273522	7.3	41	5.01067e-275	3LnHh
Pf4	0.261116	57.4	83.7	0	3LnHh
Folr2	0.209245	18	76.8	0	3LnHh
					FoldChange>1.5; positive % in the subgroup>25

## Sheet: LYVE1-MHCIIlo_markers
Featured genes in LYVE1-/MHCIIlo subgroup
Genes	FC (LnHl/rest subgroups)	% of + in LnHl	% of + in rest subgroups	p_val_adj	cluster
Gngt2	4.99296	82.9	30.4	0	4LnHl
Plac8	4.56174	69.7	22.6	0	4LnHl
Msrb1	4.37512	86.8	53.4	0	4LnHl
Itgal	4.31372	70.6	25.3	0	4LnHl
Slpi	4.25707	40.1	12.7	8.59506e-142	4LnHl
Pglyrp1	4.03986	52.3	7.9	0	4LnHl
Gsr	3.78926	80.9	38.8	0	4LnHl
Chil3	3.31894	39.4	12	1.356e-146	4LnHl
Ace	3.29179	52.2	9.6	0	4LnHl
G0s2	3.25798	28.9	4	3.12512e-218	4LnHl
Thbs1	3.25248	47.7	31.1	7.25792e-52	4LnHl
Hp	3.22063	56.5	13.1	0	4LnHl
Fabp4	2.98156	46.2	21.5	1.25026e-111	4LnHl
Slc16a3	2.94007	76.1	46.5	4.89165e-204	4LnHl
Dusp16	2.85865	58	42.2	1.3173e-94	4LnHl
Smpdl3a	2.84705	82.1	66.1	7.70478e-233	4LnHl
Lst1	2.83503	88.7	67.1	1.11283e-266	4LnHl
Pou2f2	2.80973	70.1	53.5	4.4409e-122	4LnHl
Cd9	2.78318	76.7	54.7	1.25346e-147	4LnHl
Prdx5	2.71988	89.6	80.2	1.25011e-217	4LnHl
Napsa	2.64999	77.3	47.7	4.09115e-220	4LnHl
Treml4	2.6233	49.3	8.6	0	4LnHl
Taldo1	2.58973	92.6	80.3	8.14452e-287	4LnHl
Stap1	2.5643	80.1	56.4	1.36345e-195	4LnHl
Ppp2r5a	2.53053	83	67.4	7.6477e-192	4LnHl
Clec4d	2.40839	59.9	44.8	5.93353e-61	4LnHl
Cytip	2.40582	81.4	57.1	2.00653e-179	4LnHl
Tgm2	2.39663	55.3	21.2	3.43361e-199	4LnHl
Raf1	2.39471	72.6	46.5	8.95587e-182	4LnHl
Adgre4	2.36929	50.2	19.9	1.14822e-173	4LnHl
Srgn	2.30633	98.7	96.3	3.93003e-247	4LnHl
Prdx6	2.29483	74.8	55.1	1.44929e-154	4LnHl
Spn	2.24319	48.2	14.1	3.49535e-223	4LnHl
Tmsb10	2.23186	92.3	85.4	2.35527e-147	4LnHl
Sorl1	2.21451	56.3	21.3	2.55176e-206	4LnHl
Ifitm1	2.2129	25.1	20.6	0.000173407	4LnHl
Ly6c2	2.19084	32.6	12.3	6.40408e-84	4LnHl
Cdkn1b	2.18409	62.5	38.4	6.34937e-129	4LnHl
Dusp5	2.17168	66.1	50	1.58714e-82	4LnHl
Cd300c2	2.15123	82	62.3	3.3827e-170	4LnHl
Tyrobp	2.15042	99.7	99	0	4LnHl
Slc7a11	2.12961	59.9	48.5	3.23956e-32	4LnHl
Mgst1	2.12018	61.2	39.4	1.11694e-111	4LnHl
Gcnt2	2.11191	51	17.8	2.00514e-190	4LnHl
Itgb2	2.09126	89.2	77.9	6.77165e-176	4LnHl
Cd300e	2.07783	32.8	3.4	0	4LnHl
Fcgr4	2.07529	45.7	18.9	1.62282e-132	4LnHl
Tpd52	2.07084	92.8	85.8	1.34024e-191	4LnHl
Nr4a1	2.06697	62.1	56.8	7.09237e-33	4LnHl
Ifitm3	2.06507	95.3	97.3	9.94401e-131	4LnHl
Coro1a	2.04779	96.4	91.1	4.44431e-229	4LnHl
Sirpb1c	2.0432	60	25.4	3.53085e-192	4LnHl
Tmcc1	2.035	76.9	73	2.28121e-67	4LnHl
Stk17b	2.03127	85.6	75	4.18471e-125	4LnHl
Samsn1	2.02866	73.7	55.5	2.11642e-114	4LnHl
Gk	2.02749	52.9	25.7	6.64106e-136	4LnHl
Csf3r	2.02231	37.7	25.5	1.24212e-30	4LnHl
Gpr141	2.02099	50.6	17.4	1.19423e-191	4LnHl
Ifitm6	2.01859	67.6	55.2	1.84168e-92	4LnHl
Sat1	2.00086	97.6	97.3	2.06725e-130	4LnHl
Fyb	1.99875	84	72	2.50319e-145	4LnHl
Clec4e	1.99169	73.4	45.1	3.97379e-120	4LnHl
Itga4	1.99011	71.2	62.3	6.59045e-79	4LnHl
Cks2	1.97421	61	50.7	1.90695e-50	4LnHl
Il1b	1.96797	77.5	54	5.6653e-82	4LnHl
Btg1	1.9478	97.1	93.7	6.88316e-152	4LnHl
Lrrfip1	1.93982	81	63.4	2.98139e-146	4LnHl
Cdk2ap2	1.93477	75.1	66.3	2.27239e-90	4LnHl
Apbb1ip	1.92407	77.3	62.7	2.70645e-129	4LnHl
Fmnl1	1.91746	72.3	55	3.22137e-131	4LnHl
S100a11	1.91704	86.6	81.7	9.68752e-49	4LnHl
Filip1l	1.91325	52.2	30.3	2.34903e-102	4LnHl
C3	1.91079	47.8	18	7.655e-157	4LnHl
Prr13	1.90348	85.1	77.8	6.34942e-132	4LnHl
Msn	1.9021	94.2	90.1	2.51336e-173	4LnHl
Ptpn1	1.89924	84.6	80.4	2.01743e-107	4LnHl
Rnf149	1.89829	86	76.6	7.34642e-99	4LnHl
Trem1	1.89743	35.4	7.3	7.2988e-204	4LnHl
Ceacam1	1.89705	47.4	21.4	8.93171e-130	4LnHl
Cyp4f18	1.88244	68.4	56.9	1.06459e-75	4LnHl
Cebpb	1.86668	99.1	97.4	1.71304e-223	4LnHl
Stk10	1.86035	54.5	35.3	7.4822e-91	4LnHl
Ptprc	1.85512	97.6	94.9	2.92519e-159	4LnHl
Trem3	1.8544	37.7	6.2	5.39431e-266	4LnHl
Myl12b	1.8531	88.3	79.9	2.86491e-164	4LnHl
Agpat4	1.85233	66.9	48	1.83708e-105	4LnHl
Sgms2	1.84913	36.2	17.9	4.76696e-65	4LnHl
Grk3	1.84393	51.1	26.9	1.18414e-108	4LnHl
Cd300ld	1.8425	66.6	61.3	7.22755e-48	4LnHl
Mcemp1	1.84236	43.9	16.9	1.29921e-135	4LnHl
Cd274	1.84074	45	26.9	8.67183e-62	4LnHl
Fam107b	1.83266	60.8	42.6	3.15418e-82	4LnHl
Rasgrp2	1.82937	53.5	26	1.19356e-136	4LnHl
Sell	1.82852	28.4	9.2	1.45824e-91	4LnHl
Tmem38b	1.82769	53.3	20.6	4.35547e-187	4LnHl
Adgre5	1.82596	86.3	77.4	1.90389e-114	4LnHl
Samhd1	1.81874	83.6	80.3	8.37797e-92	4LnHl
Ppp1r2	1.81451	80.7	72.2	7.85587e-116	4LnHl
Sema4d	1.81032	56	28.1	2.05411e-133	4LnHl
Eno3	1.80141	32.6	8.2	3.92273e-154	4LnHl
Gfpt1	1.79861	54.5	45.1	8.36061e-38	4LnHl
Klra2	1.79428	49.6	22	2.97669e-136	4LnHl
Pkm	1.79258	92.8	86.4	2.1158e-148	4LnHl
Ifitm2	1.79106	98.7	98.2	6.18139e-153	4LnHl
Pag1	1.79095	43.4	21.2	5.92243e-95	4LnHl
Cyfip2	1.78335	37.1	9.5	4.35175e-178	4LnHl
Smchd1	1.78221	65.9	55.9	1.2642e-64	4LnHl
Cd244	1.76962	43	18.2	1.55844e-118	4LnHl
Cybb	1.76382	94.9	97.1	7.93952e-142	4LnHl
Gpcpd1	1.7568	65.2	54.9	1.86436e-59	4LnHl
Dusp2	1.7566	48.5	27.4	2.59013e-76	4LnHl
Gm9733	1.75604	40.5	13.4	1.46372e-139	4LnHl
Neat1	1.75528	97.8	95.9	5.15736e-99	4LnHl
Ly6e	1.74876	89.2	73.2	9.05894e-111	4LnHl
Ssh2	1.7466	68.3	58.7	5.10212e-62	4LnHl
Rbpms	1.74343	47	26.3	9.21918e-85	4LnHl
Fgr	1.73156	51.7	30.3	1.19416e-92	4LnHl
Kpna4	1.71656	80.2	77.2	3.55817e-61	4LnHl
Vasp	1.71506	67.7	58.8	3.24263e-65	4LnHl
Fxyd5	1.70926	97.9	93.1	1.41781e-158	4LnHl
Fcer1g	1.70798	99.7	99.7	9.25753e-282	4LnHl
Gpr35	1.70319	54	33.1	2.79053e-86	4LnHl
Rap1a	1.7017	92.2	92.4	3.186e-125	4LnHl
Plaur	1.69869	85.5	71.3	2.44591e-95	4LnHl
Txn1	1.69627	90.6	88.3	1.45653e-85	4LnHl
Ncf2	1.68986	88.4	85.8	3.18258e-106	4LnHl
Lyn	1.6868	88.2	83.1	1.64731e-133	4LnHl
Creg1	1.68375	85.5	82.6	7.10531e-97	4LnHl
Havcr2	1.68088	44.4	16.6	2.94336e-140	4LnHl
Rgs2	1.68079	66.1	56.6	3.17628e-41	4LnHl
Ikbkb	1.67874	73.8	65.5	3.60763e-85	4LnHl
Emilin2	1.67521	77.9	75.4	4.22771e-73	4LnHl
Tmed5	1.67409	75.2	69.7	3.38085e-73	4LnHl
Lmnb1	1.67095	39.2	30.8	2.7668e-17	4LnHl
Stk24	1.66872	59.1	46.3	9.64472e-64	4LnHl
Cbfa2t3	1.66661	47.2	41.9	7.8572e-23	4LnHl
Ms4a4c	1.66367	38.7	24.2	5.92347e-39	4LnHl
Hectd1	1.65891	73	65.1	5.42848e-66	4LnHl
Cd300a	1.65468	81.1	70.5	1.96481e-103	4LnHl
Smpdl3b	1.65411	41.1	24.1	5.66995e-61	4LnHl
Mbp	1.65224	52.3	40.4	7.10925e-51	4LnHl
Gapdh	1.64654	97	94.2	1.19767e-168	4LnHl
Nedd9	1.64311	45.5	26.5	6.10614e-73	4LnHl
Rps19	1.63946	97	99.4	2.60366e-218	4LnHl
Cd44	1.63763	95	88	7.96767e-102	4LnHl
Lpar6	1.63759	51.4	35.6	4.13692e-56	4LnHl
Snx18	1.63644	70.3	57.2	1.26804e-70	4LnHl
Adipor1	1.63539	70.5	60.2	1.74046e-74	4LnHl
Nuak2	1.63315	54.1	37	1.81289e-70	4LnHl
Prkcd	1.62684	84.5	81.2	5.3589e-71	4LnHl
Tcf7l2	1.62649	39	23.6	2.64069e-49	4LnHl
Il17ra	1.62376	62.1	51.6	1.80485e-50	4LnHl
Zfyve9	1.62357	37.4	10.6	3.54218e-160	4LnHl
Rassf5	1.62249	47	33.2	2.75053e-48	4LnHl
Bin2	1.62102	50.2	27.3	2.17351e-100	4LnHl
Fbxl5	1.6205	53	41.7	2.44576e-41	4LnHl
Fau	1.61955	99.8	99.9	1.44533e-260	4LnHl
Ifngr1	1.60899	79.1	73.2	1.07084e-71	4LnHl
Cxcr4	1.6039	91.2	84.8	3.73443e-53	4LnHl
Pilra	1.60115	52.2	41	6.04717e-43	4LnHl
Bcl6	1.60112	58.6	49.2	3.70251e-45	4LnHl
Klf3	1.5983	67.2	62.2	1.23052e-40	4LnHl
Cdc42ep3	1.59806	35.2	19	1.88789e-54	4LnHl
Xylt1	1.58902	53.2	36.5	2.4387e-63	4LnHl
Ccdc88c	1.5874	35.8	16.1	4.9174e-82	4LnHl
Klhl2	1.58655	43.1	21.8	2.57921e-89	4LnHl
Ly6i	1.58606	27.2	4.3	4.63877e-188	4LnHl
Cd52	1.58537	97.5	83.8	7.94569e-114	4LnHl
Arg2	1.58269	27.2	10	2.87956e-70	4LnHl
Slc44a2	1.5815	40.9	15.1	1.1024e-127	4LnHl
Il10ra	1.57419	65.1	56.8	1.9132e-48	4LnHl
Prdx1	1.57339	92.6	96.9	1.03742e-25	4LnHl
Limd2	1.5728	47	27.9	9.79248e-72	4LnHl
Eno1	1.5725	81.1	71.7	5.69455e-88	4LnHl
Hck	1.56889	58.5	40.3	6.89795e-77	4LnHl
Grina	1.56847	54.1	57.7	0.0741736	4LnHl
Nadk	1.56759	63.7	58.7	7.05597e-45	4LnHl
Thbd	1.56494	43	22	9.94115e-77	4LnHl
Gpd2	1.5596	46.2	32.5	4.75893e-46	4LnHl
Pgd	1.55855	75	68.4	2.93692e-62	4LnHl
B2m	1.55548	99.7	99.9	3.71487e-141	4LnHl
Cebpz	1.55242	57.4	46.5	3.32598e-50	4LnHl
Rsrp1	1.55222	89.8	86.1	1.53021e-65	4LnHl
Cyth3	1.55209	46.8	39.4	3.07214e-24	4LnHl
Esd	1.55197	70.5	73.6	5.73455e-20	4LnHl
Mxi1	1.55085	52.6	38.5	1.44617e-50	4LnHl
Rps27a	1.54883	99.8	99.9	5.99412e-213	4LnHl
Aprt	1.54825	68.4	64	3.80099e-47	4LnHl
Ptpn6	1.54708	66.6	57.2	1.02097e-62	4LnHl
Fam49a	1.54694	60.5	52.8	1.45189e-43	4LnHl
Ms4a6c	1.54375	77.4	76.6	3.40734e-41	4LnHl
Nupr1	1.54182	59.8	51	4.21655e-35	4LnHl
Rps27	1.53383	99.3	99.7	6.88335e-169	4LnHl
Aldoa	1.53315	86.7	82.7	1.74785e-86	4LnHl
Lyst	1.53169	39.7	28.6	3.13813e-30	4LnHl
Susd3	1.52774	47.5	33.7	2.4051e-46	4LnHl
Atox1	1.52733	93.6	92.1	6.73567e-116	4LnHl
Myo1g	1.52617	61.3	52.4	3.1848e-41	4LnHl
H3f3a	1.52474	99.4	99.7	6.00687e-175	4LnHl
Fyn	1.52467	52	39.2	4.90417e-42	4LnHl
Nxpe4	1.52166	32.8	9	2.70327e-138	4LnHl
Rplp0	1.5196	97.7	98.9	1.49479e-129	4LnHl
Spi1	1.51944	92.5	90.7	2.59172e-92	4LnHl
Stk38	1.51827	52.1	43.5	5.25077e-34	4LnHl
Tnfrsf1a	1.51722	77.3	73.7	7.4893e-57	4LnHl
Mrpl33	1.51589	86.8	83.6	1.25848e-68	4LnHl
Slc11a1	1.51506	69.4	67.2	9.44307e-37	4LnHl
F10	1.51439	42.3	24.3	1.41743e-47	4LnHl
Flna	1.51414	84.1	76.8	1.40503e-58	4LnHl
Tpm4	1.51066	79	75.3	1.79945e-46	4LnHl
Sephs2	1.5064	36.9	22.3	8.93863e-44	4LnHl
Arhgef10l	1.5057	57	43.6	3.43874e-55	4LnHl
Retreg1	1.50431	49.4	36.8	3.49267e-41	4LnHl
Dock5	1.50405	29.5	7.9	5.9049e-128	4LnHl
Dusp6	1.50344	41.1	31.9	2.72187e-21	4LnHl
Sipa1l1	1.50166	41.2	30	3.7495e-34	4LnHl
AB124611	1.50105	59.6	48.7	2.83483e-53	4LnHl
Ldlrad3	1.49978	33	10.5	1.29719e-116	4LnHl
Nfkb1	0.667211	78	89.1	2.49958e-63	4LnHl
Vat1	0.666626	29.9	67.2	2.60282e-109	4LnHl
Myo5a	0.666237	30.6	67	4.92523e-104	4LnHl
Hexa	0.665377	71	93.8	7.83301e-117	4LnHl
Sdcbp	0.665337	89.2	98.2	5.91528e-107	4LnHl
Furin	0.66512	55.7	77.7	1.34119e-61	4LnHl
Mtmr10	0.662759	12.9	46.7	1.55454e-95	4LnHl
Mfsd11	0.662131	20.5	56.7	1.89951e-105	4LnHl
Slamf9	0.662101	18	61.2	2.14905e-130	4LnHl
Cd209b	0.659981	0.6	20.5	7.27912e-60	4LnHl
Tmem106a	0.659598	26.2	64.8	1.88532e-113	4LnHl
Blvrb	0.658381	54.9	79.1	2.30694e-72	4LnHl
Ap2a2	0.657608	44.7	77.5	1.18289e-102	4LnHl
Cd164	0.657388	29	66.4	8.76227e-112	4LnHl
Tuba1b	0.657202	50.1	83	1.20718e-110	4LnHl
Ap1b1	0.656713	16	57.2	4.29826e-132	4LnHl
Cxcl16	0.655392	28.3	73.1	2.02733e-131	4LnHl
Batf	0.65489	22.3	57.5	2.62628e-99	4LnHl
mt-Nd1	0.653226	96	99.9	1.84797e-152	4LnHl
Hbegf	0.652739	4.3	32.1	9.65034e-83	4LnHl
2020-09-11	0.65273	35.8	68.3	2.04123e-99	4LnHl
Man1a	0.652283	46.6	76.8	8.2411e-93	4LnHl
Rab11fip5	0.65224	10	49.6	4.21234e-129	4LnHl
Slamf7	0.651873	25.4	65	1.19228e-106	4LnHl
Dnajb1	0.649673	43.8	68	1.24491e-51	4LnHl
Ifi207	0.649591	74.4	87.5	9.96983e-52	4LnHl
Tfrc	0.647998	12.2	44.9	7.43497e-95	4LnHl
Ccrl2	0.647193	40	60.5	5.09731e-36	4LnHl
Ifrd1	0.645704	81.1	91.6	1.19526e-77	4LnHl
Pcyt1a	0.645296	38.4	71	1.11833e-94	4LnHl
Gatm	0.644753	14.3	55.2	4.88637e-121	4LnHl
Klf2	0.642556	57.4	74.3	4.3615e-34	4LnHl
Zfhx3	0.642336	31	71.6	9.51434e-127	4LnHl
Blnk	0.641421	16.6	63.7	5.89633e-150	4LnHl
Rnf150	0.641058	8.7	50.3	1.4648e-144	4LnHl
Cltc	0.64094	80.3	96.4	1.51083e-128	4LnHl
Bag3	0.639821	37.8	64.2	9.4682e-63	4LnHl
Timd4	0.635522	0.6	30.7	9.82658e-102	4LnHl
Arhgap18	0.635348	20	62.8	1.2001e-147	4LnHl
B4galt6	0.634524	15.6	57.1	1.05245e-134	4LnHl
Itsn1	0.632844	13.3	50.8	1.42109e-120	4LnHl
Nrp1	0.628012	29	65	1.17109e-105	4LnHl
Hspe1	0.626106	70.6	90	6.00609e-71	4LnHl
Lrp6	0.621699	13.8	51.5	4.30165e-121	4LnHl
Sulf2	0.620494	25.9	59.9	3.49772e-101	4LnHl
Qpct	0.619076	14.6	50.5	3.10549e-111	4LnHl
Cd63	0.618857	33.6	79	3.7958e-129	4LnHl
Abca1	0.618722	29.2	70.8	3.82101e-127	4LnHl
Peli1	0.618204	58.5	80.1	1.29096e-70	4LnHl
Ptafr	0.617085	61.6	92.7	1.26264e-142	4LnHl
Prcp	0.616641	62.1	89.1	4.22068e-149	4LnHl
Aplp2	0.615058	59.5	87	2.96255e-126	4LnHl
Rab3il1	0.613923	13.6	60.2	3.42578e-161	4LnHl
Cd83	0.613307	67.6	90.4	1.33707e-98	4LnHl
Stard8	0.611451	12	49.9	8.93335e-125	4LnHl
Tnip3	0.611214	39.2	58.9	4.35703e-46	4LnHl
Csrnp1	0.610857	40.4	69.3	1.79176e-87	4LnHl
P2rx7	0.610532	12.9	47.9	4.66397e-104	4LnHl
Ralgds	0.610507	13.8	55.6	1.23796e-136	4LnHl
Tcf4	0.609582	44.9	77	7.11866e-105	4LnHl
Zfp36	0.608727	91.5	96.1	3.41278e-50	4LnHl
Ehd4	0.608018	54.3	81.4	2.07229e-101	4LnHl
Tbxas1	0.607477	16.8	64.1	1.91115e-174	4LnHl
Serinc3	0.606926	94.7	97.8	1.29871e-69	4LnHl
Pros1	0.603299	18.6	61.2	2.93079e-147	4LnHl
Naaa	0.601837	40.5	72.7	7.40916e-110	4LnHl
Ppp1r15a	0.601134	68.9	88	2.02721e-93	4LnHl
Slc5a3	0.601133	14.7	49.8	8.16887e-103	4LnHl
Kctd12	0.599111	68.9	91.8	3.81886e-130	4LnHl
Nr4a3	0.597339	33.7	54.4	2.51597e-41	4LnHl
Plxnd1	0.596585	18.6	62.3	7.16444e-157	4LnHl
Abca9	0.596243	12.5	58.9	1.32186e-167	4LnHl
Fosb	0.595909	29	66.4	7.46564e-110	4LnHl
Serpinb8	0.594935	20.6	62.3	9.08594e-140	4LnHl
Cxcl2	0.59352	47.5	77	1.31603e-93	4LnHl
Impact	0.592555	46.8	78.7	5.18553e-120	4LnHl
Adam15	0.59134	29.4	71.7	2.04293e-158	4LnHl
Flrt3	0.59127	2.7	27	1.17613e-72	4LnHl
Frmd4b	0.590214	13.7	57.7	4.31471e-147	4LnHl
Tnf	0.59016	27.3	67.7	2.07467e-122	4LnHl
Pea15a	0.587848	23.6	71.2	3.26542e-175	4LnHl
Tgfbi	0.58749	74.1	96.1	1.94722e-135	4LnHl
Gm42418	0.586447	99.8	100	2.865e-33	4LnHl
Tnfaip3	0.584987	37.1	68.6	6.96309e-95	4LnHl
Ccl12	0.582944	7.6	27	4.90214e-43	4LnHl
Snx5	0.577567	51.1	87.7	2.61103e-160	4LnHl
Grn	0.574076	75.6	95.7	1.52595e-161	4LnHl
Ighm	0.573328	35.3	66.8	1.13341e-88	4LnHl
Phlda1	0.572337	26.1	57.3	1.16604e-84	4LnHl
Lifr	0.571062	16.9	61.6	2.08515e-155	4LnHl
Rab7b	0.570451	34.6	78.6	9.41877e-148	4LnHl
Dhrs3	0.56907	22.3	75.5	1.41321e-192	4LnHl
Igf1	0.563961	14.3	55.9	6.70547e-132	4LnHl
Ccr5	0.56319	34.3	65.6	9.02381e-91	4LnHl
Kitl	0.561391	4.9	49.8	2.00525e-168	4LnHl
Pdxk	0.552829	27.8	65.3	9.10593e-122	4LnHl
Snx2	0.551217	40.8	75	1.83519e-128	4LnHl
Psd3	0.550983	8.8	57.9	4.64179e-188	4LnHl
Tspan3	0.550344	14.4	59	2.02129e-165	4LnHl
Sdc3	0.542104	32.6	77.9	2.82666e-192	4LnHl
Junb	0.541228	93.9	97.3	6.84231e-99	4LnHl
Ctsc	0.54038	79.6	97.3	1.48602e-160	4LnHl
Il1rn	0.539468	24.4	48.3	4.28608e-57	4LnHl
Serpinb6a	0.539033	24.8	65.4	7.66142e-131	4LnHl
Irf2bp2	0.538576	59.8	88.6	7.47819e-156	4LnHl
Rnase4	0.5374	25.2	63.2	7.17642e-127	4LnHl
Gas7	0.537331	31.1	77.6	7.53903e-198	4LnHl
Fn1	0.537316	43.4	53.1	8.74475e-15	4LnHl
Mmp19	0.537092	17.1	39.9	1.04947e-46	4LnHl
Pepd	0.533225	36.8	79.5	3.77055e-188	4LnHl
Irf4	0.526397	3.7	44.9	1.99711e-152	4LnHl
Stab1	0.523379	21.2	61.5	9.8984e-128	4LnHl
Ifih1	0.522321	13.3	43.1	2.37942e-83	4LnHl
Dok2	0.522268	10.4	64.1	4.72373e-225	4LnHl
Ccl6	0.521615	80.6	93.4	4.10094e-117	4LnHl
Nrp2	0.515791	19.5	70.4	2.26885e-203	4LnHl
Cd209g	0.5155	1	31.3	5.78946e-102	4LnHl
Lmna	0.513409	29	84.5	1.76397e-210	4LnHl
Ccl4	0.512043	34.9	66.3	9.35995e-96	4LnHl
Ifi203	0.510636	23.5	67.2	1.91354e-154	4LnHl
Trf	0.508361	53.5	84.3	1.75439e-147	4LnHl
Gas2l3	0.508059	26.9	72.7	3.87323e-178	4LnHl
Raph1	0.506816	25.8	72.6	1.5409e-187	4LnHl
Glul	0.499006	42.2	77	8.15086e-147	4LnHl
Marcksl1	0.492473	51.1	84.2	1.39181e-157	4LnHl
Klf6	0.490512	92.6	98.5	4.39135e-180	4LnHl
Hsp90aa1	0.490024	93.6	98.4	1.14109e-114	4LnHl
Tns1	0.486881	9.7	57.8	5.23017e-188	4LnHl
Atf3	0.481914	68.1	91.3	8.14982e-149	4LnHl
Isg15	0.480926	22.2	49	5.7212e-65	4LnHl
Hspd1	0.479887	44.3	76.7	4.90799e-114	4LnHl
Crip1	0.476827	87.7	99.4	1.3628e-189	4LnHl
S100a10	0.472872	62.9	94.5	5.05241e-167	4LnHl
Fcgr2b	0.469717	45.5	87.8	8.01725e-243	4LnHl
Jund	0.469532	93.2	98.5	7.00302e-173	4LnHl
C3ar1	0.46737	24.8	80	1.78163e-206	4LnHl
Emp1	0.463676	27.4	77.2	8.4749e-182	4LnHl
Rhob	0.458593	35	73.7	1.3859e-146	4LnHl
Clic4	0.45281	51.2	87.4	2.18265e-199	4LnHl
Fcgrt	0.452557	32.8	70.6	7.37701e-155	4LnHl
Rbpj	0.450024	50.4	92.7	5.32749e-285	4LnHl
Ahnak	0.447148	74.3	97.9	2.06172e-262	4LnHl
Clec4b1	0.446377	10.4	59.6	6.96108e-203	4LnHl
Wwp1	0.442108	18.9	62.9	6.26824e-177	4LnHl
Fgfr1	0.440323	2.2	61.8	2.67402e-274	4LnHl
Mtss1	0.434634	24	72.1	1.48597e-211	4LnHl
Pmp22	0.430536	21.9	77.4	1.13065e-221	4LnHl
Ccl9	0.416399	62.3	93.9	5.57148e-247	4LnHl
Rsad2	0.414066	7.3	30.5	8.19459e-61	4LnHl
Cd81	0.413143	30	85.9	1.49088e-260	4LnHl
Oasl1	0.412706	4.2	39.5	3.74646e-120	4LnHl
Egr1	0.408678	15.5	58	1.10699e-149	4LnHl
Etv3	0.408054	49.4	84	1.23621e-203	4LnHl
C1qb	0.406101	25.8	86.8	2.08925e-228	4LnHl
Tmem176b	0.406068	41.5	94.3	0	4LnHl
Mafb	0.405801	60.8	88.3	1.04306e-170	4LnHl
Lpl	0.404273	23.8	63.8	1.74811e-137	4LnHl
Mt2	0.400903	6.8	47.9	7.92676e-148	4LnHl
Cfh	0.399696	35.2	67.3	5.69314e-131	4LnHl
Hsph1	0.398982	36.7	65.9	1.58298e-93	4LnHl
Ltc4s	0.397317	8.7	55	6.28087e-179	4LnHl
Fcna	0.382277	3.2	43.5	2.89398e-150	4LnHl
C4b	0.379661	4.8	46.6	2.64264e-155	4LnHl
Tmem176a	0.373122	33.4	91	0	4LnHl
Eps8	0.370982	42.4	88.3	2.86765e-288	4LnHl
C1qc	0.369793	25.6	83.2	1.60765e-224	4LnHl
Cbr2	0.365793	11.4	60.1	1.95269e-195	4LnHl
Timp2	0.364911	38.2	88.1	1.40491e-267	4LnHl
Sdc4	0.361345	19.5	74.7	3.60922e-225	4LnHl
C1qa	0.360965	25.3	83.3	2.24651e-225	4LnHl
Cd209d	0.355424	1.9	45.9	1.08509e-170	4LnHl
Jun	0.353999	58.3	76.1	7.08728e-85	4LnHl
Fcrls	0.352952	12.4	71.3	7.02958e-261	4LnHl
Igfbp4	0.351275	12.9	63.2	2.04752e-212	4LnHl
Ifit1	0.346428	2.8	28.9	6.51203e-80	4LnHl
Cfp	0.335112	33.5	83.2	0	4LnHl
Ednrb	0.334681	8.6	53.4	1.22705e-173	4LnHl
H2-DMa	0.333629	47.7	87.9	0	4LnHl
Cxcl10	0.332875	11.2	47.1	5.03825e-114	4LnHl
Gas6	0.332388	12.5	63.2	1.15284e-215	4LnHl
Cd209f	0.317145	1.9	36.1	1.21584e-118	4LnHl
Maf	0.313411	27.2	74.4	1.90008e-231	4LnHl
Cd209a	0.312215	2.2	48.2	4.13757e-183	4LnHl
Hspa1a	0.311187	56	86.2	2.02219e-177	4LnHl
Cd163	0.305937	5.6	58.8	4.56848e-224	4LnHl
Ecm1	0.303588	18.3	78	0	4LnHl
Hspa1b	0.302051	57	86	4.39636e-170	4LnHl
H2-DMb1	0.297685	27.8	82	0	4LnHl
Fxyd2	0.289643	9.5	62	1.31656e-228	4LnHl
Dab2	0.283474	21.2	84	0	4LnHl
Rgl1	0.282498	17.8	79	0	4LnHl
Clec10a	0.280671	9.5	65.5	4.31805e-260	4LnHl
Ccl7	0.274792	16.4	59.9	4.60035e-160	4LnHl
Ccl2	0.272885	30.1	78.4	3.96904e-222	4LnHl
Pltp	0.271486	44.7	92.3	0	4LnHl
Ccl24	0.267456	6.1	65.1	4.56464e-270	4LnHl
F13a1	0.249314	40	85.7	2.68902e-286	4LnHl
Pf4	0.242576	28.4	80	2.14933e-245	4LnHl
Ccl8	0.236086	4	31	1.07336e-81	4LnHl
Mgl2	0.232322	6.7	76.5	0	4LnHl
Selenop	0.23229	67.4	92.4	1.33022e-241	4LnHl
Folr2	0.231861	10.7	59.7	3.20076e-210	4LnHl
Mrc1	0.217537	21.1	90.3	0	4LnHl
Lyve1	0.202737	0	53.6	7.1954e-235	4LnHl
Mt1	0.181067	37.4	92.5	0	4LnHl
Lyz1	0.11595	9.8	51.5	1.86041e-159	4LnHl
Cd74	0.0906279	82.1	96.6	0	4LnHl
H2-Aa	0.0432937	36.9	94.1	0	4LnHl
H2-Ab1	0.0381155	39.7	94.5	0	4LnHl
H2-Eb1	0.0363375	28.1	93	0	4LnHl
Retnla	0.0227429	20.8	72.6	1.64455e-290	4LnHl
					FoldChange>1.5; positive % in the subgroup>25
