# Supplementary material for: Single-cell analysis of skeletal muscle macrophages reveals age-associated functional subpopulations
Source: eLife. 2022 Oct 19;11:e77974. doi: 10.7554/eLife.77974 (PMC9629833; doi:10.7554/eLife.77974)
Supplement: Supplementary file 4. [file elife-77974-supp4.xlsx]

## Sheet: O-Y_All_Sig
Table S4. Differentially expressed genes in macrophages from young and old mouse skeletal muscle
All O/Y
Gene	Fold-Change (O/Y)	% of positive cells in O	% of positive cells in Y	p_val_adj
S100a9	4.1952	16.3	5.5	6.2098e-57
S100a8	4.03913	14.8	4.5	1.60865e-57
Spp1	3.40826	21.2	14.2	6.05026e-18
Fabp5	3.25325	41.7	29.7	1.27825e-47
Gpnmb	2.24921	13.2	2.5	3.22183e-75
Thbs1	2.00317	41	24.7	6.5124e-66
Slpi	1.81685	22.3	9.4	1.32137e-59
Plac8	1.80734	35.5	21.1	1.35116e-55
Ccl8	1.67761	30.4	24.6	7.80603e-11
Chil3	1.67075	21.2	8.8	7.09162e-58
Mpeg1	1.59629	87.6	74.6	1.62921e-175
Clec4d	1.57392	54	38.4	1.7196e-69
Lgals3	1.5647	93.7	91.1	1.09376e-46
Msrb1	1.55634	63.6	51.4	5.54711e-67
Gsr	1.54213	50.3	38	1.36782e-48
Gngt2	1.53861	45.8	27	2.10922e-83
Prdx5	1.5261	84.6	77.5	6.94922e-92
Fabp4	1.51992	28.6	21	1.2542e-19
Clec4e	1.47839	56.2	40.2	5.48949e-60
Mgst1	1.46048	52	30.6	2.45382e-117
Ctss	1.44062	98.7	99.3	2.39276e-124
Hp	1.43587	25.6	11.2	9.87764e-68
Slc7a11	1.42234	54.6	44.1	2.24789e-27
Hdc	1.40827	11	5.2	1.14727e-20
Prdx6	1.39514	62.3	52.6	1.30396e-47
Taldo1	1.3919	84.1	80	2.60012e-62
Sirpb1c	1.38919	40	18.4	4.07881e-116
Sgk1	1.38303	44.7	33.7	7.63099e-34
Prdx1	1.37779	96.4	96.7	1.03333e-22
Smpdl3a	1.36781	72.9	62.7	6.34067e-63
Emb	1.35767	73.6	59.8	2.31483e-72
Slc16a3	1.35673	55.3	45.5	1.19566e-28
Rbm3	1.35191	94.2	91.3	6.2165e-144
Lyz2	1.34497	99.7	99.7	9.09044e-113
Il1b	1.33099	62.1	51.4	2.31067e-26
Esd	1.32606	75.5	70.9	8.31382e-35
Apoe	1.32512	89.6	85.7	2.65905e-17
Itgal	1.31855	37.2	25.4	1.0188e-34
Btg1	1.31731	95.7	92.7	4.10805e-60
Trem2	1.31332	56.8	52.7	3.97926e-08
Psap	1.30208	99.5	99.8	5.08979e-41
Irf2bp2	0.769286	82.2	88.9	1.37445e-62
Ppp1r15a	0.7682	83.7	89	6.60145e-43
Ltc4s	0.767185	44.3	54.8	1.17615e-32
Cfh	0.764059	60.3	67.4	1.06766e-28
Mgl2	0.763748	60.7	75.7	8.68972e-61
Crip1	0.763719	97.2	98.7	1.65692e-69
Ccl24	0.758938	51.2	65.2	2.25336e-44
Jund	0.75846	97.2	98.7	6.34522e-50
Mid1	0.758084	24	45.5	6.72868e-124
Rgl1	0.754715	66.4	77.7	5.57997e-46
Kdm6b	0.749977	90.2	93.1	3.52263e-87
Emp1	0.744305	66.1	77	5.44308e-48
Pepd	0.743791	68.7	81.4	3.30287e-96
Atf3	0.74344	86.2	91.3	7.77018e-55
Pltp	0.740831	82.7	90.4	5.8187e-79
Aqp1	0.74052	9.7	18.1	1.88594e-30
Snx2	0.739845	66.5	76.7	1.85038e-68
AY036118	0.737877	70.6	80.1	3.09939e-35
Serpinb6a	0.735275	54.3	68.2	1.41474e-60
Tppp3	0.733257	54.3	66.6	1.99326e-45
Pmp22	0.727546	64.6	77.7	1.16318e-70
Fcgrt	0.726682	61	72.1	2.03135e-58
Cxcl10	0.723474	38.6	47.5	2.85372e-16
Gas6	0.722372	51.1	63.7	2.62179e-50
Mt2	0.716104	38	49.6	3.93281e-32
Mrc1	0.708973	75.7	88.4	1.64291e-88
Etv3	0.707555	76.4	83.8	7.39011e-75
Tnf	0.705987	57.3	69.4	3.18693e-44
Ccl2	0.703608	67.1	79.1	3.66953e-40
mt-Nd3	0.69958	95.4	98.6	1.49501e-176
Ccl4	0.698687	59.5	67.5	5.18448e-17
F13a1	0.695772	76.2	84.1	1.64815e-68
Gm47283	0.693174	46.8	64.3	3.30117e-108
Fcrls	0.689201	56.3	72.6	4.37744e-91
Zfp36	0.678764	94.7	96.9	5.46793e-69
Junb	0.674953	96.2	98	7.33211e-81
Cbr2	0.673354	47.8	61.7	8.26286e-70
Ccl7	0.666593	48.3	62.8	1.2188e-40
Mt1	0.664759	81.4	90.8	6.29024e-73
Ednrb	0.658421	42.9	53.9	5.01156e-42
Cd83	0.642092	83.7	92.7	8.56037e-140
Cxcl2	0.63411	69.5	78.7	1.76611e-45
Lyve1	0.6319	40	54.9	5.1795e-61
Retnla	0.624874	59.2	76.2	1.94598e-67
Cxcl1	0.620713	19	30.5	3.35615e-37
Gm42418	0.61749	99.9	99.9	1.51016e-67
Folr2	0.607458	46.8	62.2	3.53341e-81
				p value<0.01; FC>1.3; Positive cell % in Y or O>10
